# Supplementary material for: Ultrasound-promoted synthesis of novel N-arylamino-3,5′-biquinoline derivatives: their applications in live-cell imaging and in vitro anticancer activity evaluation
Source: Royal Society of Chemistry journal article supplement (doi:10.1039/d2nj04444g), 2023-01-01
Supplement: d2nj04444g1.pdf [file d2nj04444g1.pdf]

## Supporting Information

### Ultrasound-Promoted Synthesis of Novel *N*-Arylamino-3,5'- biquinoline Derivatives: Their Applications in Live-Cell Imaging and in Vitro Anticancer Activity Evaluation

Abdolali Alizadeh,<sup>\*a</sup> Azar Rostampoor,<sup>a</sup> Mozhgan Alipour,<sup>b</sup> Behnam Hajipour-Verdom,<sup>b</sup> Parviz  
Abdolmaleki<sup>b</sup>

<sup>a</sup>Department of Chemistry, Tarbiat Modares University, P.O. Box 14115-175, Tehran, Iran

<sup>b</sup>Department of Biophysics, Tarbiat Modares University, P.O. Box 14115-154, Tehran, Iran

[aalizadeh@modares.ac.ir](mailto:aalizadeh@modares.ac.ir)

#### The Table of Contents

|                                                                             |         |
|-----------------------------------------------------------------------------|---------|
| Title, author's name, address and Table of contents                         | S1      |
| Experimental and general procedure for the synthesis of <b>5a-i</b>         | S1-S2   |
| Characteristic data for compounds <b>5a-i</b>                               | S2-S10  |
| ORTEP diagram of <b>3a</b>                                                  | S3      |
| <sup>1</sup> H NMR, <sup>13</sup> C NMR, IR and Mass spectra of <b>5a-i</b> | S11-S61 |

#### Experimental Section

##### General remarks:

All Starting materials were synthesized according to the procedures reported in the literature [32, 33].

A single crystal of compounds **3a** was formed in DCM and MeOH mixture. Elemental analyses for C, H and N were performed using a Heraeus CHN–O–Rapid analyzer. Mass spectra were recorded on a Finnigan-MATT 8430 mass spectrometer operating at an ionization potential of 70 eV. <sup>1</sup>H NMR (300 MHz) and <sup>13</sup>C NMR (75 MHz) spectra were obtained using Bruker DRX-300 AVANCE and

---

\*Corresponding author, Tel.: +98 21 8800663; fax: +98 21 88006544; e-mail: [aalizadeh@modares.ac.ir](mailto:aalizadeh@modares.ac.ir)

Bruker DRX-500 AVANCE spectrometers. The fluorescence spectra were recorded on PerkinElmer LS 45 fluorescence spectrometer. The absorption spectra were taken via the Rayleigh UV-2601 spectrophotometer. Chemical shifts are reported in parts per million ( $\delta$ ) downfield from an internal tetramethylsilane reference. Coupling constants ( $J$  values) are reported in hertz (Hz). IR spectra were recorded as KBr pellets on a NICOLET FT-IR 100 spectrometer; absorbances are reported in  $\text{cm}^{-1}$ . Melting points were measured on an Electrothermal 9100. All reactions were conducted by the QSONICA Q700 sonicator at an amplitude of 60% and a frequency of 20 kHz. The temperature of the reaction under US irradiation was checked using a mercury laboratory thermometer.

### General Procedure for Preparation of Compounds 3a-j.

To a mixture of 2-chloro-3-formyl quinoline derivatives (1.0 mmol), and  $\alpha,\alpha$ -dicyanoolefines (2.0 mmol) in EtOH (10 mL),  $\text{Et}_3\text{N}$  (15 mmol %) were added. Then, the mixture was subjected to US irradiation (20 kHz) at 60 °C temperature. The amplitude of the US waves was fixed at 60%. After 30-40 min continuous irradiation, the reaction was completed and a light-yellow solid was isolated by simple filtration [derivatives (3a, 3g, 3h, 3i, 3j) were purified by washing with EtOH twice] and other derivatives (3b, 3c, 3d, 3e, 3f) were purified by recrystallization in DMF.

### Characteristic data for compounds (3a-3j).

#### 2'-Amino-2-chloro-4',7'-diphenyl-[3,5'-biquinoline]-3',8'-dicarbonitrile (3a).

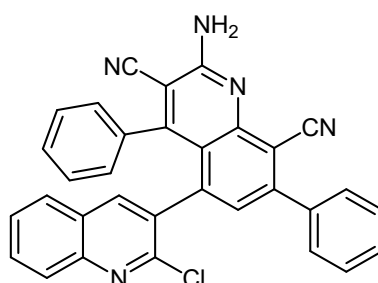

Light yellow solid, m.p = 268-270 °C (dec.), 0.46 g, yield: 91%. IR (KBr) ( $\nu_{\text{max}}$ ,  $\text{cm}^{-1}$ ): 3469, 3381, 2223, 1606, 1560, 1546, 1420  $\text{cm}^{-1}$ .  $^1\text{H}$  NMR (300.13 MHz,  $\text{DMSO}-d_6$ ): 6.60 (1H, t,  $^3J_{\text{HH}} = 7.3$  Hz, CH of Ph), 6.63 (1H, t,  $^3J_{\text{HH}} = 7.3$  Hz, CH of Ph), 6.96 (1H, t,  $^3J_{\text{HH}} = 7.3$  Hz, CH of Ph), 7.03 (1H, d,

$^3J_{\text{HH}} = 7.3$  Hz, CH of Ph), 7.23 (1H, d,  $^3J_{\text{HH}} = 7.6$  Hz, CH of Ph), 7.34 (1H, s, CH<sup>6</sup> of quinoline), 7.56 (1H, t,  $^3J_{\text{HH}} = 7.1$  Hz, CH of Ph), 7.57- 7.62 (3H, m, CH<sup>6</sup> of quinoline and 2CH of Ph), 7.68 (2H, bs, NH<sub>2</sub>), 7.75- 7.79 (4H, m, 2CH of Ph, CH<sup>5</sup> and CH<sup>8</sup> of quinoline), 7.76 (1H, t,  $^3J_{\text{HH}} = 7.6$  Hz, CH<sup>7</sup> of quinoline), 8.09 (1H, s, CH<sup>4</sup> of quinoline). <sup>13</sup>C NMR (75.46 MHz, DMSO-*d*<sub>6</sub>): 98.70, 107.13, 114.98, 117.03, 118.48, 125.91, 127.06, 127.21, 127.28, 127.40, 127.79, 127.81, 128.76, 128.97, 129.09, 129.59, 130.83, 132.14, 135.56, 136.98, 140.26, 140.90, 146.09, 147.71, 149.17, 151.23, 156.61, 156.71. MS (EI, 70 eV) *m/z* (%): 509 (M<sup>+</sup><sub>2</sub>, 47), 508 (M<sup>+</sup><sub>1</sub>, 52), 507 (M<sup>+</sup>, 100), 473 (17), 472 (37), 469 (6), 446 (6), 427 (5), 393 (5), 235 (32), 213 (9), 194 (9), 76 (9), 51 (14). Anal. calcd. for C<sub>32</sub>H<sub>18</sub>ClN<sub>5</sub> (507.98): C, 75.66; H, 3.57; N, 13.79. Found: C, 75.68; H, 3.56; N, 13.78%. Crystal data for **3a** C<sub>32</sub>H<sub>18</sub>ClN<sub>5</sub> (CCDC 2092629): M<sub>w</sub> = 507.96, monoclinic, C 1 2/c 1, a = 27.234(5) Å, b = 8.3608(17) Å, c = 23.028(5) Å, α = 90.0, β = 109.84(3), γ = 90.0, V = 4932.2(19) Å<sup>3</sup>, Z = 8, D<sub>c</sub> = 1.368 mg/m<sup>3</sup>, F(000) = 2096, crystal dimension 0.20 × 0.15 × 0.10 mm, radiation, Mo Kα (λ = 0.71073 Å), 1.9 ≤ 2θ ≤ 25.0, intensity data were collected at 290 K with a Bruker APEX area-detector diffractometer, and employing ω/2θ scanning technique, in the range of -32 ≤ h ≤ 32, -9 ≤ k ≤ 9, -26 ≤ l ≤ 24; the structure was solved by a direct method, all non-hydrogen atoms were positioned and anisotropic thermal parameters refined from 4153 observed reflections with R (into) = 0.0499 by a full-matrix least-squares technique converged to R1 = 0.0668, and wR2 = 0.1571 [I > 2σ(I)].

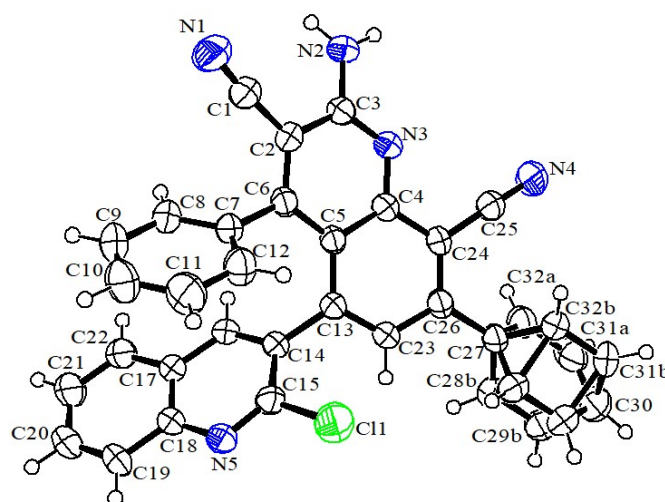

ORTEP diagram of **3a**

**2'-Amino-4',7'-bis(4-bromophenyl)-2-chloro-[3,5'-biquinoline]-3',8'-dicarbonitrile (3b).**

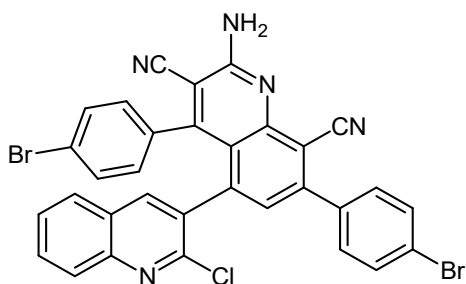

Light yellow solid, m.p = 280-282 °C (dec.), 0.51 g, yield: 82%. IR (KBr) ( $\nu_{\max}$ ,  $\text{cm}^{-1}$ ): 3380, 3319, 3229, 2223, 1642, 1590, 1569, 1486, 1426, 1052, 1005, 749  $\text{cm}^{-1}$ .  $^1\text{H}$  NMR (300.13 MHz,  $\text{DMSO-}d_6$ ): 6.80 (1H, dd,  $^3J_{\text{HH}} = 8.5$  Hz,  $^4J_{\text{HH}} = 1.7$  Hz, CH of Ar), 6.96 (1H, dd,  $^3J_{\text{HH}} = 8.3$  Hz,  $^4J_{\text{HH}} = 1.9$  Hz, CH of Ar), 7.15 (1H, dd,  $^3J_{\text{HH}} = 7.7$  Hz,  $^4J_{\text{HH}} = 1.7$  Hz, CH of Ar), 7.19 (1H, dd,  $^3J_{\text{HH}} = 7.7$  Hz,  $^4J_{\text{HH}} = 1.9$  Hz, CH of Ar), 7.37 (1H, s,  $\text{CH}^6$ ), 7.66 (1H, t,  $^3J_{\text{HH}} = 7.8$  Hz,  $\text{CH}^6$  of quinoline), 7.71 (2CH, d,  $^3J_{\text{HH}} = 7.2$  Hz, CH of Ar), 7.72 (2H, bs,  $\text{NH}_2$ ), 7.77 (2H, d,  $^3J_{\text{HH}} = 7.8$  Hz, CH of Ar), 7.79 (1H, d,  $^3J_{\text{HH}} = 8.0$  Hz,  $\text{CH}^8$  of quinoline), 7.82 (1H, d,  $^3J_{\text{HH}} = 7.9$  Hz,  $\text{CH}^5$  of quinoline), 7.84 (1H, t,  $^3J_{\text{HH}} = 8.7$  Hz,  $\text{CH}^7$  of quinoline), 8.10 (1H, s,  $\text{CH}^4$  of quinoline).  $^{13}\text{C}$  NMR (75.46 MHz,  $\text{DMSO-}d_6$ ): 98.73, 107.20, 114.80, 116.82, 118.37, 122.43, 123.39, 125.82, 127.23, 127.53, 127.61, 128.22, 129.29, 130.85, 131.18, 131.67, 131.80, 131.95, 134.47, 136.03, 140.19, 140.77, 146.13, 147.63, 148.01, 151.09, 155.43, 156.50. MS (EI, 70 eV)  $m/z$  (%): 667 ( $\text{M}^{+2}$ , 28), 666 ( $\text{M}^{+1}$ , 76), 665 ( $\text{M}^+$ , 100), 664 (45), 630 (23), 586 (4), 550 (15), 469 (4), 442 (13), 274 (4), 234 (25), 221 (14), 207 (17), 83 (12), 56 (13). Anal. calcd. for  $\text{C}_{32}\text{H}_{16}\text{Br}_2\text{ClN}_5$  (665.77): C, 57.73; H, 2.42; N, 10.52. Found: C, 57.75; H, 2.41; N, 10.51%.

**2'-Amino-4',7'-bis(4-bromophenyl)-2-chloro-6-methyl-[3,5'-biquinoline]-3',8'-dicyanitrile (3c).**

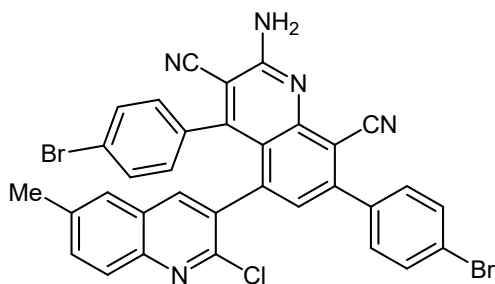

Light yellow solid, m.p = 286-288 °C (dec.), 0.55 g, yield: 82%. IR (KBr) ( $\nu_{\max}$ ,  $\text{cm}^{-1}$ ): 3440, 3336, 3225, 2220, 1642, 1566, 1490, 1420, 1073, 1004, 837, 824, 803  $\text{cm}^{-1}$ .  $^1\text{H}$  NMR (300.13 MHz,  $\text{DMSO-}d_6$ ): 2.51 (3H, s,  $\text{CH}_3$ ), 6.85 (1H, dd,  $^3J_{\text{HH}} = 8.3$  Hz,  $^4J_{\text{HH}} = 1.8$  Hz, CH of Ar), 6.94 (1H, dd,  $^3J_{\text{HH}} = 8.2$  Hz,  $^4J_{\text{HH}} = 1.8$  Hz, CH of Ar), 7.11 (1H, dd,  $^3J_{\text{HH}} = 7.4$  Hz,  $^4J_{\text{HH}} = 1.7$  Hz, CH of Ar), 7.14 (1H, dd,  $^3J_{\text{HH}} = 7.4$  Hz,  $^4J_{\text{HH}} = 1.9$  Hz, CH of Ar), 7.34 (1H, s,  $\text{CH}^6$ ), 7.56 (1H, s,  $\text{CH}^5$  of quinoline), 7.61 (1H, dd,  $^3J_{\text{HH}} = 8.6$  Hz,  $^4J_{\text{HH}} = 1.9$  Hz,  $\text{CH}^7$  of quinoline), 7.70 (2H, d,  $^3J_{\text{HH}} = 8.6$  Hz, 2CH of Ar), 7.72 (1H, d,  $^3J_{\text{HH}} = 8.6$  Hz,  $\text{CH}^8$  of quinoline), 7.74 (2H, bs,  $\text{NH}_2$ ), 7.76 (2H, d,  $^3J_{\text{HH}} = 8.8$  Hz, 2CH of Ar), 7.96 (1H, s,  $\text{CH}^4$  of quinoline).  $^{13}\text{C}$  NMR (75.46 MHz,  $\text{DMSO-}d_6$ ): 21.23, 98.77, 107.20, 114.82, 116.85, 118.45, 122.49, 123.41, 125.85, 126.18, 126.35, 127.54, 129.16, 129.20, 131.04, 131.36, 131.60, 131.86, 134.54, 136.08, 137.28, 139.70, 140.96, 144.80, 146.74, 148.03, 151.11, 155.51, 156.51. MS (EI, 70 eV)  $m/z$  (%): 683 ( $\text{M}^{+4}$ , 19), 682 ( $\text{M}^{+3}$ , 21), 681 ( $\text{M}^{+2}$ , 88), 680 ( $\text{M}^{+1}$ , 80), 679 ( $\text{M}^+$ , 100), 677 (25), 676 (50), 645 (18), 644 (33), 600 (4), 563 (14), 522 (6), 482 (5), 281 (5), 260 (13), 228 (17), 207 (6), 148 (51), 83 (15), 56 (61), 55 (51), 50 (8). Anal. calcd. for  $\text{C}_{33}\text{H}_{18}\text{Br}_2\text{ClN}_5$  (679.80): C, 58.31; H, 2.67; N, 10.30. Found: C, 58.33; H, 2.66; N, 10.29%.

**2'-Amino-4',7'-bis(4-bromophenyl)-2-chloro-6-methoxy-[3,5'-biquinoline]-3',8'-dicarbonitrile (3d).**

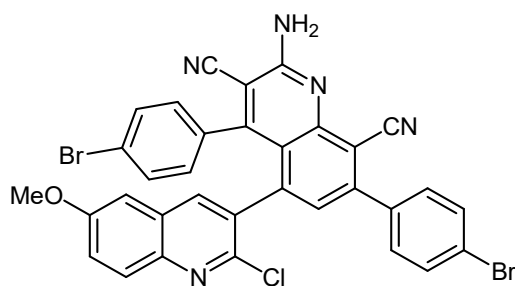

Light yellow solid, m.p = 315-317 °C (dec.), 0.57 g, yield: 82%. IR (KBr) ( $\nu_{\max}$ ,  $\text{cm}^{-1}$ ):  $\text{cm}^{-1}$ . 3392, 2217, 1621, 1590, 1568, 1492, 1457, 1383, 1227, 1073, 1040, 1011, 803  $\text{cm}^{-1}$ .  $^1\text{H}$  NMR (300.13 MHz,  $\text{DMSO-}d_6$ ): 3.91 (3H, s,  $\text{OCH}_3$ ), 6.75 (1H, dd,  $^3J_{\text{HH}} = 7.9$  Hz,  $^4J_{\text{HH}} = 1.8$  Hz, CH of Ar), 6.94 (1H, dd,  $^3J_{\text{HH}} = 7.7$  Hz,  $^4J_{\text{HH}} = 1.1$  Hz, CH of Ar), 7.10-7.12 (2H, m, 2CH of Ar), 7.14 (1H, d,  $^4J_{\text{HH}} = 2.8$  Hz,  $\text{CH}^5$  of quinoline), 7.34 (1H, s,  $\text{CH}^6$ ), 7.41 (1H, dd,  $^3J_{\text{HH}} = 9.1$  Hz,  $^4J_{\text{HH}} = 2.7$  Hz,  $\text{CH}^7$  of quinoline),

7.70 (1H, d,  $^3J_{\text{HH}} = 8.7$  Hz, CH<sup>8</sup> of quinoline), 7.72 (2H, bs, NH<sub>2</sub>), 7.75 (2H, d,  $^3J_{\text{HH}} = 8.5$  Hz, 2CH of Ar), 7.77 (2H, dd,  $^3J_{\text{HH}} = 8.5$  Hz,  $^4J_{\text{HH}} = 1.8$  Hz, 2CH of Ar), 7.92 (1H, s, CH<sup>4</sup> of quinoline). <sup>13</sup>C NMR (75.46 MHz, DMSO-*d*<sub>6</sub>): 55.71, 98.73, 105.43, 107.17, 114.83, 116.86, 118.39, 122.53, 123.41, 127.08, 127.43, 128.85, 129.07, 130.17, 130.82, 131.21, 131.59, 131.78, 132.00, 134.53, 136.05, 138.99, 142.15, 144.99, 148.02, 151.11, 155.52, 156.50, 158.08. MS (EI, 70 eV) *m/z* (%): 700 (M<sup>+</sup>, 9), 699 (M<sup>+</sup>, 23), 698 (M<sup>+</sup>, 60), 697 (M<sup>+</sup>, 100), 696 (M<sup>+</sup>, 100), 694 (14), 692 (35), 660 (24), 617 (6), 580 (8), 558 (9), 536 (8), 522 (14), 506 (13), 486 (3), 455 (3), 424 (4), 343 (4), 313 (5), 289 (3), 260 (5), 228 (14), 193 (14), 156 (9), 127(5), 102 (14), 72 (38), 52 (4). Anal. calcd. for C<sub>33</sub>H<sub>18</sub>Br<sub>2</sub>ClN<sub>5</sub>O (695.80): C, 56.97; H, 2.61; N, 10.07. Found: C, 56.99; H, 2.60; N, 10.06%.

**2'-Amino-2-chloro-4',7'-bis(4-chlorophenyl)-[3,5'-biquinoline]-3',8'-dicarbonitrile (3e).**

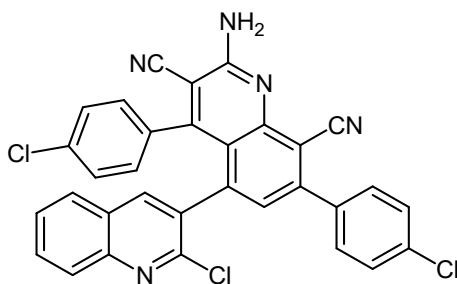

Light yellow solid, m.p = 275-276 °C (dec.), 0.43 g, yield: 75%. IR (KBr) ( $\nu_{\text{max}}$ , cm<sup>-1</sup>): 3467, 2222, 1674, 1625, 1594, 1560, 1543, 1491, 1384, 1092, 1016, 831, 771 cm<sup>-1</sup>. <sup>1</sup>H NMR (300.13 MHz, DMSO-*d*<sub>6</sub>): 6.66 (1H, dd,  $^3J_{\text{HH}} = 8.2$  Hz,  $^4J_{\text{HH}} = 2.2$  Hz, 2CH of Ph), 7.02 (2H, dd,  $^3J_{\text{HH}} = 8.4$  Hz,  $^4J_{\text{HH}} = 1.8$  Hz, 2CH of Ph), 7.25 (1H, dd,  $^3J_{\text{HH}} = 8.2$  Hz,  $^4J_{\text{HH}} = 2.2$  Hz, 2CH of Ph), 7.38 (1H, s, CH<sup>6</sup>), 7.63 (2H, d,  $^3J_{\text{HH}} = 8.6$  Hz, 2CH of Ph), 7.65 (1H, t,  $^3J_{\text{HH}} = 7.6$  Hz, CH<sup>6</sup> of quinoline), 7.73 (2H, bs, NH<sub>2</sub>), 7.75 (1H, t,  $^3J_{\text{HH}} = 7.6$  Hz, CH<sup>7</sup> of quinoline), 7.79 (1H, d,  $^3J_{\text{HH}} = 7.3$  Hz, CH<sup>8</sup> of quinoline), 7.81 (2H, d,  $^3J_{\text{HH}} = 8.6$  Hz, 2CH of Ph), 7.84 (1H, d,  $^3J_{\text{HH}} = 7.3$  Hz, CH<sup>5</sup> of quinoline), 8.10 (1H, s, CH<sup>4</sup> of quinoline). <sup>13</sup>C NMR (75.46 MHz, DMSO-*d*<sub>6</sub>): 99.12, 109.27, 114.70, 116.57, 119.17, 125.75, 126.86, 127.64, 128.01, 128.30, 128.93, 129.26, 130.29, 131.31, 132.24, 133.39, 135.25, 135.65, 136.29, 138.56, 138.91, 140.75, 146.85, 148.23, 148.98, 151.18, 155.42, 155.78. MS (EI, 70 eV) *m/z* (%): 582 (M<sup>+</sup>, 16), 580 (M<sup>+</sup>, 33), 579 (M<sup>+</sup>, 66), 578 (M<sup>+</sup>, 88), 577 (M<sup>+</sup>, 100), 575(61), 558 (11),

557 (19), 541 (23), 540 (27), 522 (5), 504 (9), 478 (5), 415 (10), 295 (5), 270 (5), 252 (9), 234 (6), 207 (7), 162 (5), 126 (9), 100 (10), 74 (28), 72 (81), 50 (19). Anal. calcd. for C<sub>32</sub>H<sub>16</sub>Cl<sub>3</sub>N<sub>5</sub> (576.87): C, 66.63; H, 2.80; N, 12.14. Found: C, 66.65; H, 2.79; N, 12.13%.

**2'-Amino-2-chloro-4',7'-bis(4-chlorophenyl)-6-methyl-[3,5'-biquinoline]-3',8'-dicarbonitrile (3f).**

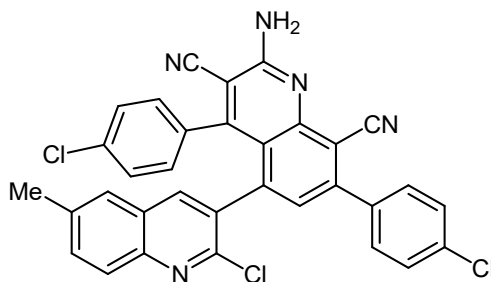

Light yellow solid, m.p = 320-321 °C (dec.), 0.47 g, yield: 80%. IR (KBr) ( $\nu_{\max}$ , cm<sup>-1</sup>): 3440, 3335, 3219, 2219, 1643, 1562, 1496, 1413, 821, 697 cm<sup>-1</sup>. <sup>1</sup>H NMR (300.13 MHz, DMSO-*d*<sub>6</sub>): 2.47 (3H, s, CH<sub>3</sub>), 6.65 (1H, dd, <sup>3</sup>J<sub>HH</sub> = 8.2 Hz, <sup>4</sup>J<sub>HH</sub> = 2.1 Hz, CH of Ph), 6.76 (1H, dd, <sup>3</sup>J<sub>HH</sub> = 8.2 Hz, <sup>4</sup>J<sub>HH</sub> = 2.2 Hz, CH of Ph), 6.98 (1H, dd, <sup>3</sup>J<sub>HH</sub> = 8.2 Hz, <sup>4</sup>J<sub>HH</sub> = 2.1 Hz, CH of Ph), 7.25 (1H, dd, <sup>3</sup>J<sub>HH</sub> = 8.4 Hz, <sup>4</sup>J<sub>HH</sub> = 2.2 Hz, 1CH of Ph), 7.26 (1H, s, CH<sup>6</sup>), 7.51 (2H, <sup>3</sup>J<sub>HH</sub> = 8.4 Hz, 2CH of Ar), 7.58 (1H, d, <sup>4</sup>J<sub>HH</sub> = 1.1 Hz, CH<sup>5</sup> of quinoline), 7.62 (2H, bs, NH<sub>2</sub>), 7.64 (2H, d, <sup>3</sup>J<sub>HH</sub> = 8.6 Hz, 2CH of Ar), 7.68 (1H, dd, <sup>3</sup>J<sub>HH</sub> = 8.6 Hz, <sup>4</sup>J<sub>HH</sub> = 1.9 Hz, CH<sup>7</sup> of quinoline), 7.96 (1H, d, <sup>3</sup>J<sub>HH</sub> = 8.4 Hz, CH<sup>8</sup> of quinoline), 8.03 (1H, s, CH<sup>4</sup> of quinoline). <sup>13</sup>C NMR (75.46 MHz, DMSO-*d*<sub>6</sub>): 21.16, 98.84, 107.22, 114.78, 116.83, 118.48, 125.81, 127.60, 127.90, 128.97, 129.04, 130.79, 131.05, 131.32, 131.88, 133.06, 133.65, 134.13, 134.61, 135.67, 137.19, 139.37, 140.89, 144.74, 146.71, 147.92, 151.08, 155.46, 156.48. MS (EI, 70 eV) *m/z* (%): 590 (M<sup>+</sup>, 2), 572 (12), 571 (38), 570 (16), 569 (33), 560 (38), 522 (14), 389 (3), 368 (3), 295 (4), 260 (14), 148 (9), 121 (9), 94 (28), 83 (57), 68 (100), 51 (14). Anal. calcd. for C<sub>33</sub>H<sub>18</sub>Cl<sub>3</sub>N<sub>5</sub> (590.89): C, 67.08; H, 3.07; N, 11.85. Found: C, 67.10; H, 3.08; N, 11.86%.

**2'-Amino-2,6-dichloro-4',7'-diphenyl-[3,5'-biquinoline]-3',8'-dicarbonitrile (3g).**

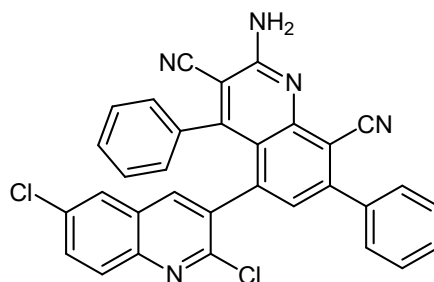

Light yellow solid, m.p = 268-270 °C (dec.), 0.46 g, yield: 85%. IR (KBr) ( $\nu_{\max}$ ,  $\text{cm}^{-1}$ ): 3382, 2223, 1648, 1561, 1481, 1420, 1050, 1027, 754, 701  $\text{cm}^{-1}$ .  $^1\text{H}$  NMR (500.13 MHz,  $\text{DMSO-}d_6$ ): 6.67 (1H, t,  $^3J_{\text{HH}} = 7.0$  Hz, CH of Ph), 6.73 (1H, t,  $^3J_{\text{HH}} = 7.3$  Hz, CH of Ph), 6.97 (1H, t,  $^3J_{\text{HH}} = 7.5$  Hz, CH of Ph), 7.04 (1H, d,  $^3J_{\text{HH}} = 8.3$  Hz, CH of Ph), 7.23 (1H, d,  $^3J_{\text{HH}} = 8.3$  Hz, CH of Ph), 7.35 (1H, s,  $\text{CH}^6$ ), 7.50-7.59 (3H, m, 3CH of Ph), 7.69 (2H, bs,  $\text{NH}_2$ ), 7.73-7.75 (2H, m,  $\text{CH}^7$  and  $\text{CH}^8$  of quinoline), 7.77-7.79 (2H, m, 2CH of Ph), 7.91 (1H, s,  $\text{CH}^5$  of quinoline), 8.01 (1H, s,  $\text{CH}^4$  of quinoline).  $^{13}\text{C}$  NMR (75.46 MHz,  $\text{DMSO-}d_6$ ): 98.76, 107.32, 114.93, 116.98, 118.35, 126.23, 126.73, 127.49, 127.96, 128.73, 128.81, 128.90, 129.21, 129.58, 129.76, 131.51, 133.19, 135.52, 136.93, 139.39, 139.60, 140.40, 144.53, 148.40, 149.18, 151.21, 156.54, 156.62. MS (EI, 70 eV)  $m/z$  (%): 545 ( $\text{M}^{+4}$ , 19), 544 ( $\text{M}^{+3}$ , 40), 543 ( $\text{M}^{+1}$ , 95), 542 ( $\text{M}^+$ , 100), 508 (10), 507 (15), 506 (33), 470 (9), 453 (3), 427 (5), 401 (2), 343 (5), 252 (4), 77 (9), 51 (5). Anal. calcd. for  $\text{C}_{32}\text{H}_{17}\text{Cl}_2\text{N}_5$  (542.42): C, 70.86; H, 3.16; N, 12.91. Found: C, 70.88; H, 3.15; N, 12.90%.

**2'-Amino-2-chloro-6-methyl-4',7'-diphenyl-[3,5'-biquinoline]-3',8'-dicarbonitrile (3h).**

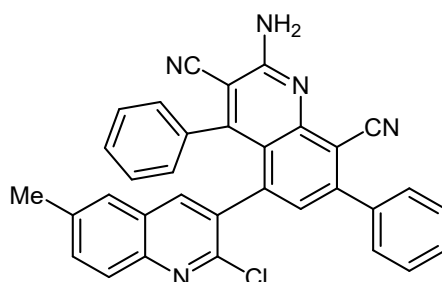

Light yellow solid, m.p = 265-267 °C (dec.), 0.46 g, yield: 88%. IR (KBr) ( $\nu_{\max}$ ,  $\text{cm}^{-1}$ ): 3450, 2217, 1638, 1561, 1494, 1418, 1050, 1026, 1001, 703  $\text{cm}^{-1}$ .  $^1\text{H}$  NMR (300.13 MHz,  $\text{DMSO-}d_6$ ): 2.46 (3H, s,  $\text{CH}_3$ ), 6.62 (1H, t,  $^3J_{\text{HH}} = 7.3$  Hz, CH of Ph), 6.67 (1H, t,  $^3J_{\text{HH}} = 7.6$  Hz, CH of Ph), 6.96 (1H, t,  $^3J_{\text{HH}} = 7.5$  Hz, CH of Ph), 7.01 (1H, d,  $^3J_{\text{HH}} = 7.3$  Hz, CH of Ph), 7.23 (1H, d,  $^3J_{\text{HH}} = 7.5$  Hz, CH of



Ph), 7.29 (1H, s, CH<sup>6</sup>), 7.50-7.57 (3H, m, 3CH of Ph), 7.53 (2H, bs, NH<sub>2</sub>), 7.59 (1H, s, CH<sup>5</sup> of quinolone), 7.63 (1H, d, <sup>3</sup>J<sub>HH</sub> = 8.3 Hz, CH<sup>7</sup> of quinoline), 7.65 (1H, d, <sup>3</sup>J<sub>HH</sub> = 8.3 Hz, CH<sup>8</sup> of quinoline), 7.74 (2H, dd, <sup>3</sup>J<sub>HH</sub> = 7.5 Hz, <sup>4</sup>J<sub>HH</sub> = 2.4 Hz, 2CH of Ph), 7.96 (1H, s, CH<sup>4</sup> of quinoline). <sup>13</sup>C NMR (75.46 MHz, DMSO-d<sub>6</sub>): 21.10, 98.68, 107.08, 114.94, 116.98, 118.43, 125.89, 126.23, 126.40, 127.41, 126.75, 127.05, 127.98, 128.70, 128.83, 129.16, 129.46, 129.59, 132.08, 135.46, 136.78, 136.94, 141.00, 144.69, 146.75, 149.08, 151.18, 156.56, 156.69. MS (EI, 70 eV) m/z (%): 523 (M<sup>+2</sup>, 40), 522 (M<sup>+1</sup>, 43), 521 (M<sup>+</sup>, 100), 487 (10), 486 (36), 460 (3), 442 (4), 242 (19), 221 (5), 187 (2), 161 (2), 111 (3), 83 (8), 56 (7). Anal. calcd. for C<sub>33</sub>H<sub>20</sub>ClN<sub>5</sub> (521.14): C, 75.93; H, 3.86; N, 13.42. Found: C, 75.95; H, 3.85; N, 13.41%.

**2'-Amino-2-chloro-6-methoxy-4',7'-diphenyl-[3,5'-biquinoline]-3',8'-dicyanitrile (3i).**

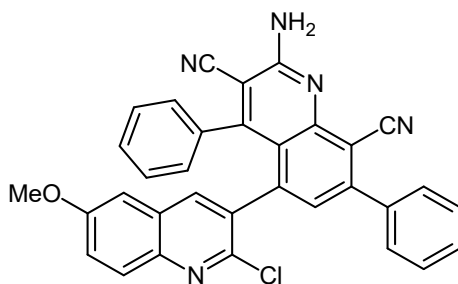

Light yellow solid, m.p = 295-297 °C (dec.), 0.48 g, yield: 90%. IR (KBr) (ν<sub>max</sub>, cm<sup>-1</sup>): 3438, 3332, 3213, 2219, 1644, 1620, 1546, 1495, 1415, 1329, 1224, 1024, 839, 699 cm<sup>-1</sup>. <sup>1</sup>H NMR (300.13 MHz, DMSO-d<sub>6</sub>): 3.87 (3H, s, OCH<sub>3</sub>), 6.64 (1H, t, <sup>3</sup>J<sub>HH</sub> = 7.5 Hz, CH of Ph), 6.75 (1H, t, <sup>3</sup>J<sub>HH</sub> = 7.5 Hz, CH of Ph), 6.95 (1H, t, <sup>3</sup>J<sub>HH</sub> = 7.5 Hz, CH of Ph), 7.03 (1H, d, <sup>3</sup>J<sub>HH</sub> = 7.7 Hz, CH of Ph), 7.13 (1H, d, <sup>4</sup>J<sub>HH</sub> = 2.8 Hz, CH<sup>5</sup> of quinoline), 7.21 (1H, d, <sup>3</sup>J<sub>HH</sub> = 8.0 Hz, CH of Ph), 7.30 (1H, s, CH<sup>6</sup>), 7.37 (1H, dd, <sup>3</sup>J<sub>HH</sub> = 9.0 Hz, <sup>4</sup>J<sub>HH</sub> = 2.7 Hz, CH<sup>7</sup> of quinoline), 7.50-7.57 (3H, m, 3CH of Ph), 7.65 (2H, bs, NH<sub>2</sub>), 7.66 (1H, d, <sup>3</sup>J<sub>HH</sub> = 9.0 Hz, CH<sup>8</sup> of quinoline), 7.75 (2H, dd, <sup>3</sup>J<sub>HH</sub> = 7.3 Hz, <sup>4</sup>J<sub>HH</sub> = 2.4 Hz, 2CH of Ph), 7.93 (1H, s, CH<sup>4</sup> of quinoline). <sup>13</sup>C NMR (75.46 MHz, DMSO-d<sub>6</sub>): 55.39, 98.66, 105.62, 107.09, 114.94, 116.98, 118.40, 122.95, 127.10, 128.72, 127.88, 127.90, 128.06, 128.71, 128.82, 129.14, 129.45, 129.61, 132.23, 135.45, 136.95, 141.05, 142.07, 145.03, 149.10, 151.18, 156.56, 156.69, 157.64. MS (EI, 70 eV) m/z (%): 539 (M<sup>+2</sup>, 44), 538 (M<sup>+1</sup>, 52), 537 (M<sup>+</sup>, 100), 518 (9), 502

(14), 503 (38), 459 (18), 430 (9), 250 (2), 229 (19), 188 (4), 83 (4), 66 (3), 50 (2). Anal. calcd. for  $C_{33}H_{20}ClN_5O$  (537.14): C, 73.67; H, 3.75; N, 13.02. Found: C, 73.69; H, 3.74; N, 13.01%.

**2-Amino-5-(2-chlorobenzo[*h*]quinolin-3-yl)-4,7-diphenylquinoline-3,8-dicarbonitrile (3j).**

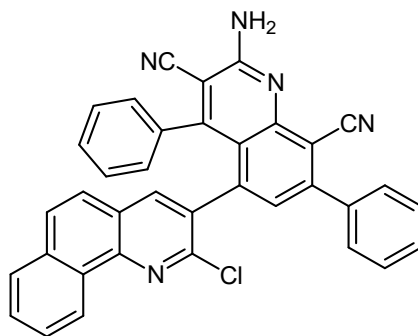

Light yellow solid, m.p = 350 °C (dec.), 0.47 g, yield: 85%. IR (KBr) ( $\nu_{\max}$ ,  $\text{cm}^{-1}$ ): 3405, 3340, 3229, 2225, 1636, 1562, 1481, 1419, 1368, 750, 701  $\text{cm}^{-1}$ .  $^1\text{H}$  NMR (300.13 MHz,  $\text{DMSO-}d_6$ ): 6.45 (1H, t,  $^3J_{\text{HH}} = 7.5$  Hz, CH of Ph), 6.66 (1H, t,  $^3J_{\text{HH}} = 7.7$  Hz, CH of Ph), 6.88 (1H, t,  $^3J_{\text{HH}} = 7.6$  Hz, CH of Ph), 7.05 (1H, d,  $^3J_{\text{HH}} = 7.7$  Hz, CH of Ph), 7.25 (1H, d,  $^3J_{\text{HH}} = 7.8$  Hz, CH of Ph), 7.37 (1H, s,  $\text{CH}^6$ ), 7.52-7.60 (3H, m, 3CH of Ph), 7.65 (1H, d,  $^3J_{\text{HH}} = 8.8$  Hz,  $\text{CH}^6$  of quinoline), 7.69 (2H, bs,  $\text{NH}_2$ ), 7.71-7.80 (4H, m, 2CH of Ph,  $\text{CH}^8$  and  $\text{CH}^9$  of quinoline), 7.93 (1H, d,  $^3J_{\text{HH}} = 8.8$  Hz,  $\text{CH}^5$  of quinoline), 8.03 (1H, dd,  $^3J_{\text{HH}} = 7.7$  Hz,  $^4J_{\text{HH}} = 2.5$  Hz,  $\text{CH}^7$  of quinoline), 8.12 (1H, s,  $\text{CH}^4$  of quinoline), 8.84 (1H, dd,  $^3J_{\text{HH}} = 7.9$  Hz,  $^4J_{\text{HH}} = 2.7$  Hz,  $\text{CH}^{10}$  of quinoline).  $^{13}\text{C}$  NMR (75.46 MHz,  $\text{DMSO-}d_6$ ): 98.71, 107.15, 114.99, 117.06, 118.39, 123.73, 124.12, 124.65, 127.04, 127.39, 127.44, 127.77, 127.93, 128.00, 128.10, 128.79, 128.89, 129.09, 129.21, 129.61, 132.89, 133.46, 135.57, 136.98, 140.24, 140.92, 144.37, 146.85, 149.19, 151.28, 156.63, 156.68. MS (EI, 70 eV)  $m/z$  (%): 559 ( $\text{M}^{+2}$ , 13), 558 ( $\text{M}^{+1}$ , 9), 557 ( $\text{M}^+$ , 41), 522 (15), 294 (9), 260 (19), 238 (5), 218 (5), 184 (5), 166 (5), 148 (25), 120 (9), 96 (23), 83 (60), 68 (100), 50 (9). Anal. calcd. for  $C_{36}H_{20}ClN_5$  (557.14): C, 77.48; H, 3.61; N, 12.55. Found: C, 77.50; H, 3.60; N, 12.54%.

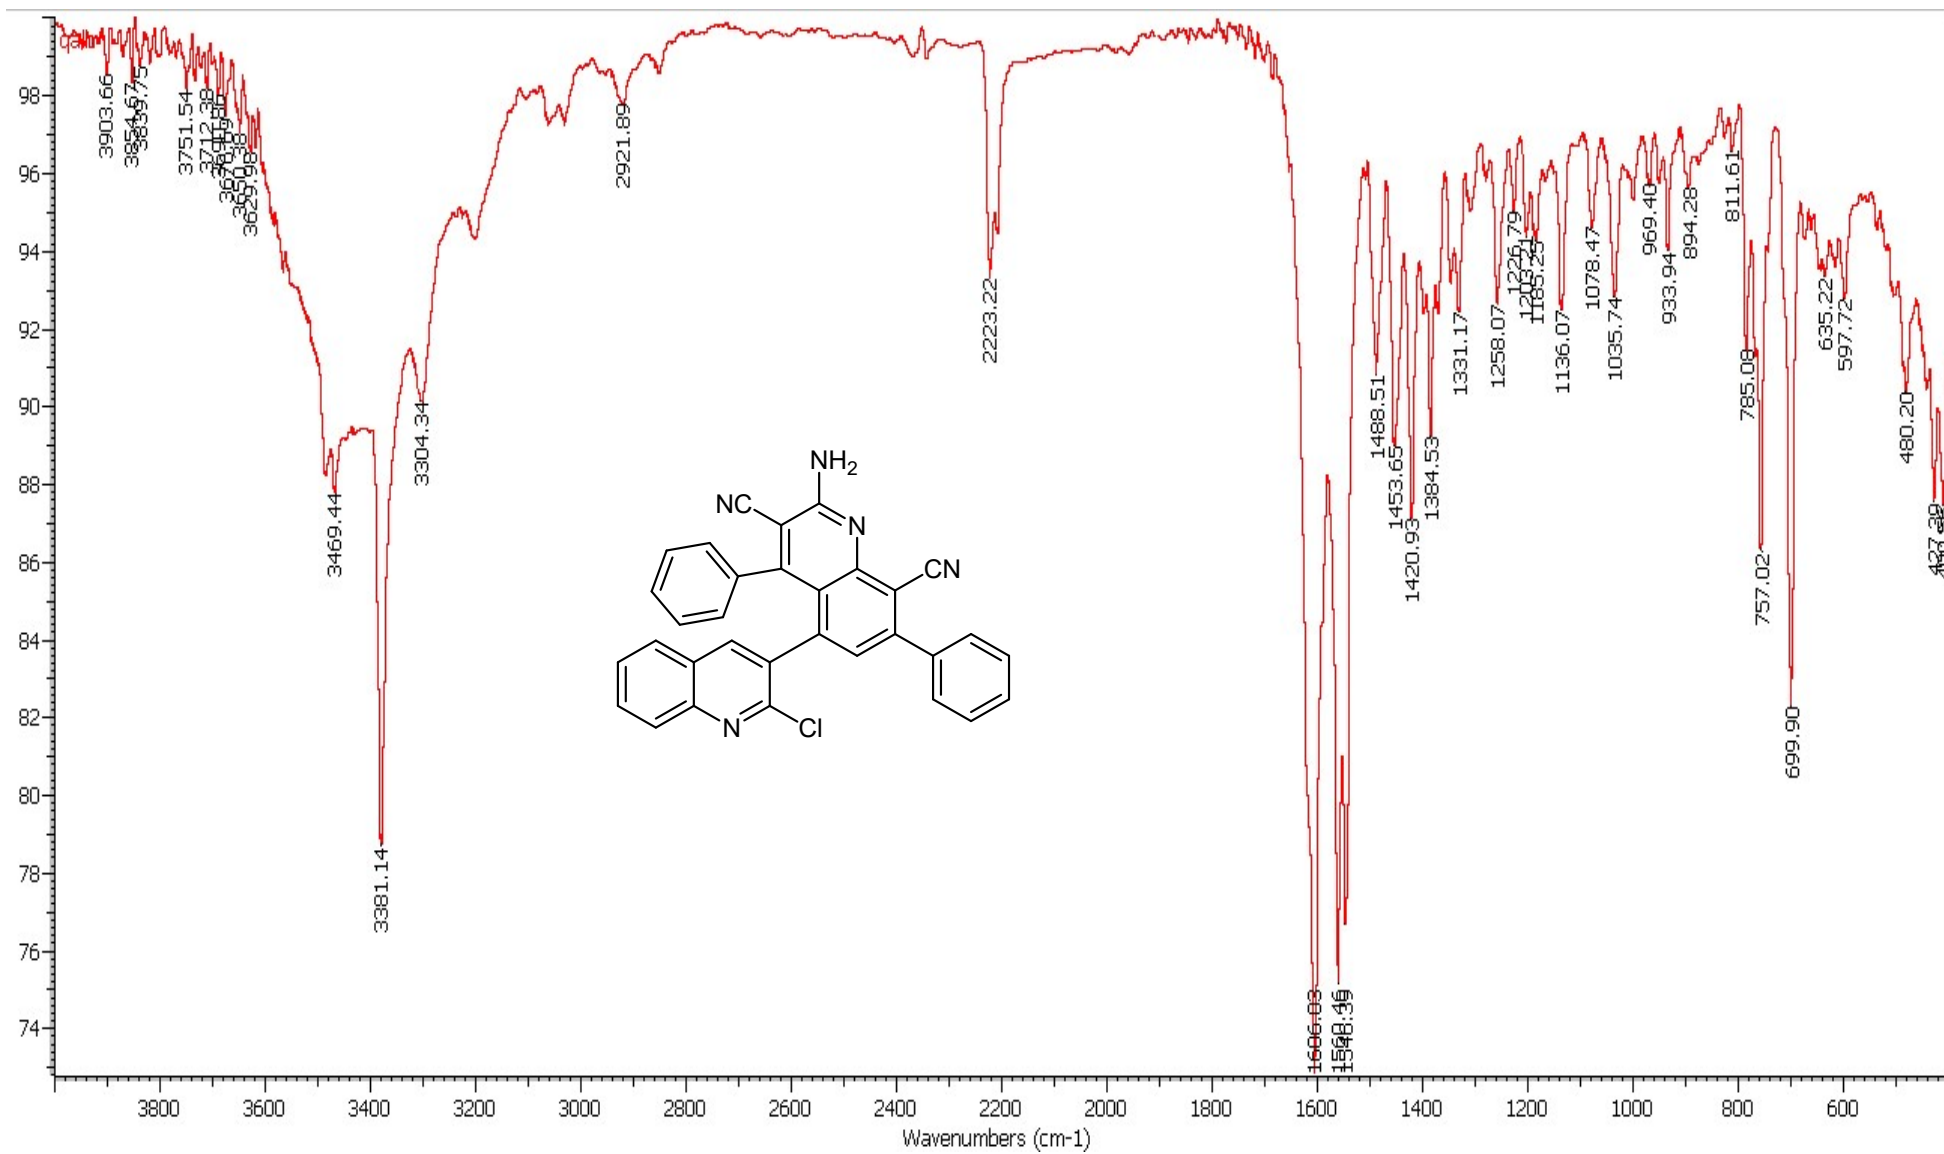

IR Spectrum of 3a

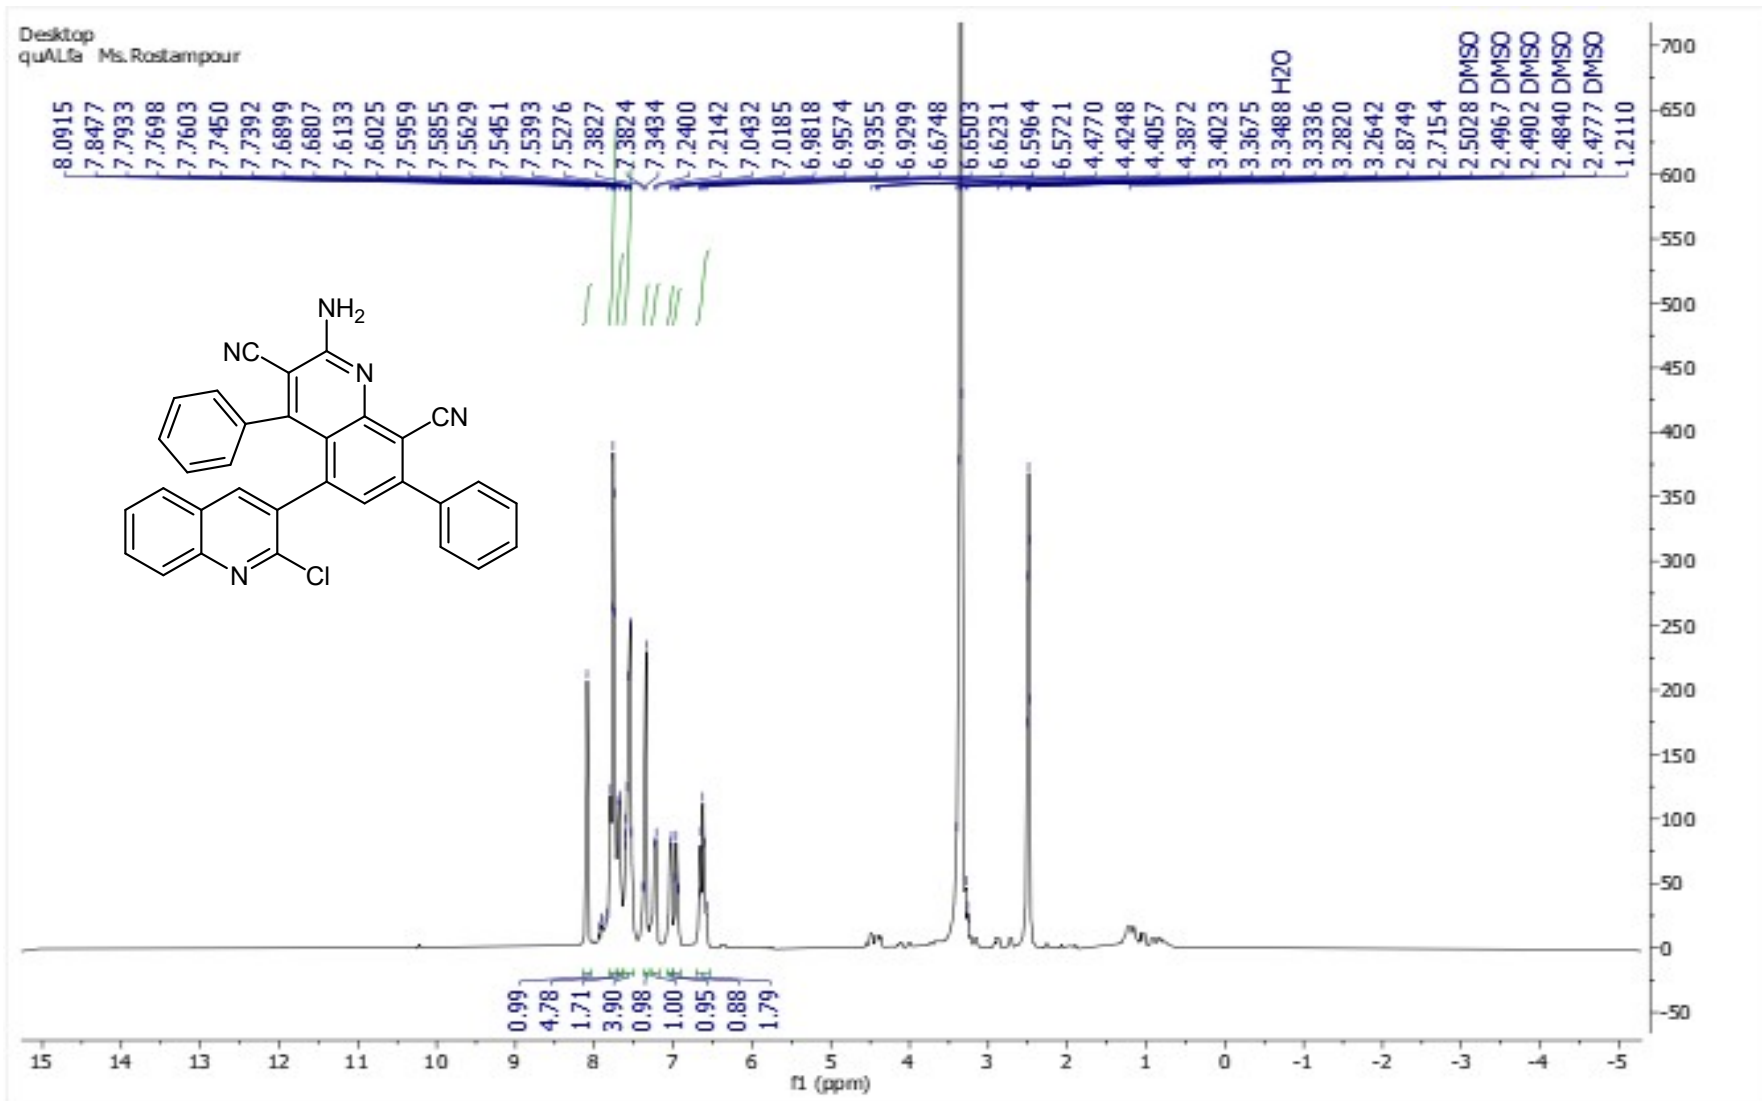

$^1\text{H}$  NMR Spectrum of **3a**

Desktop  
quALfa Ms.Rostandour

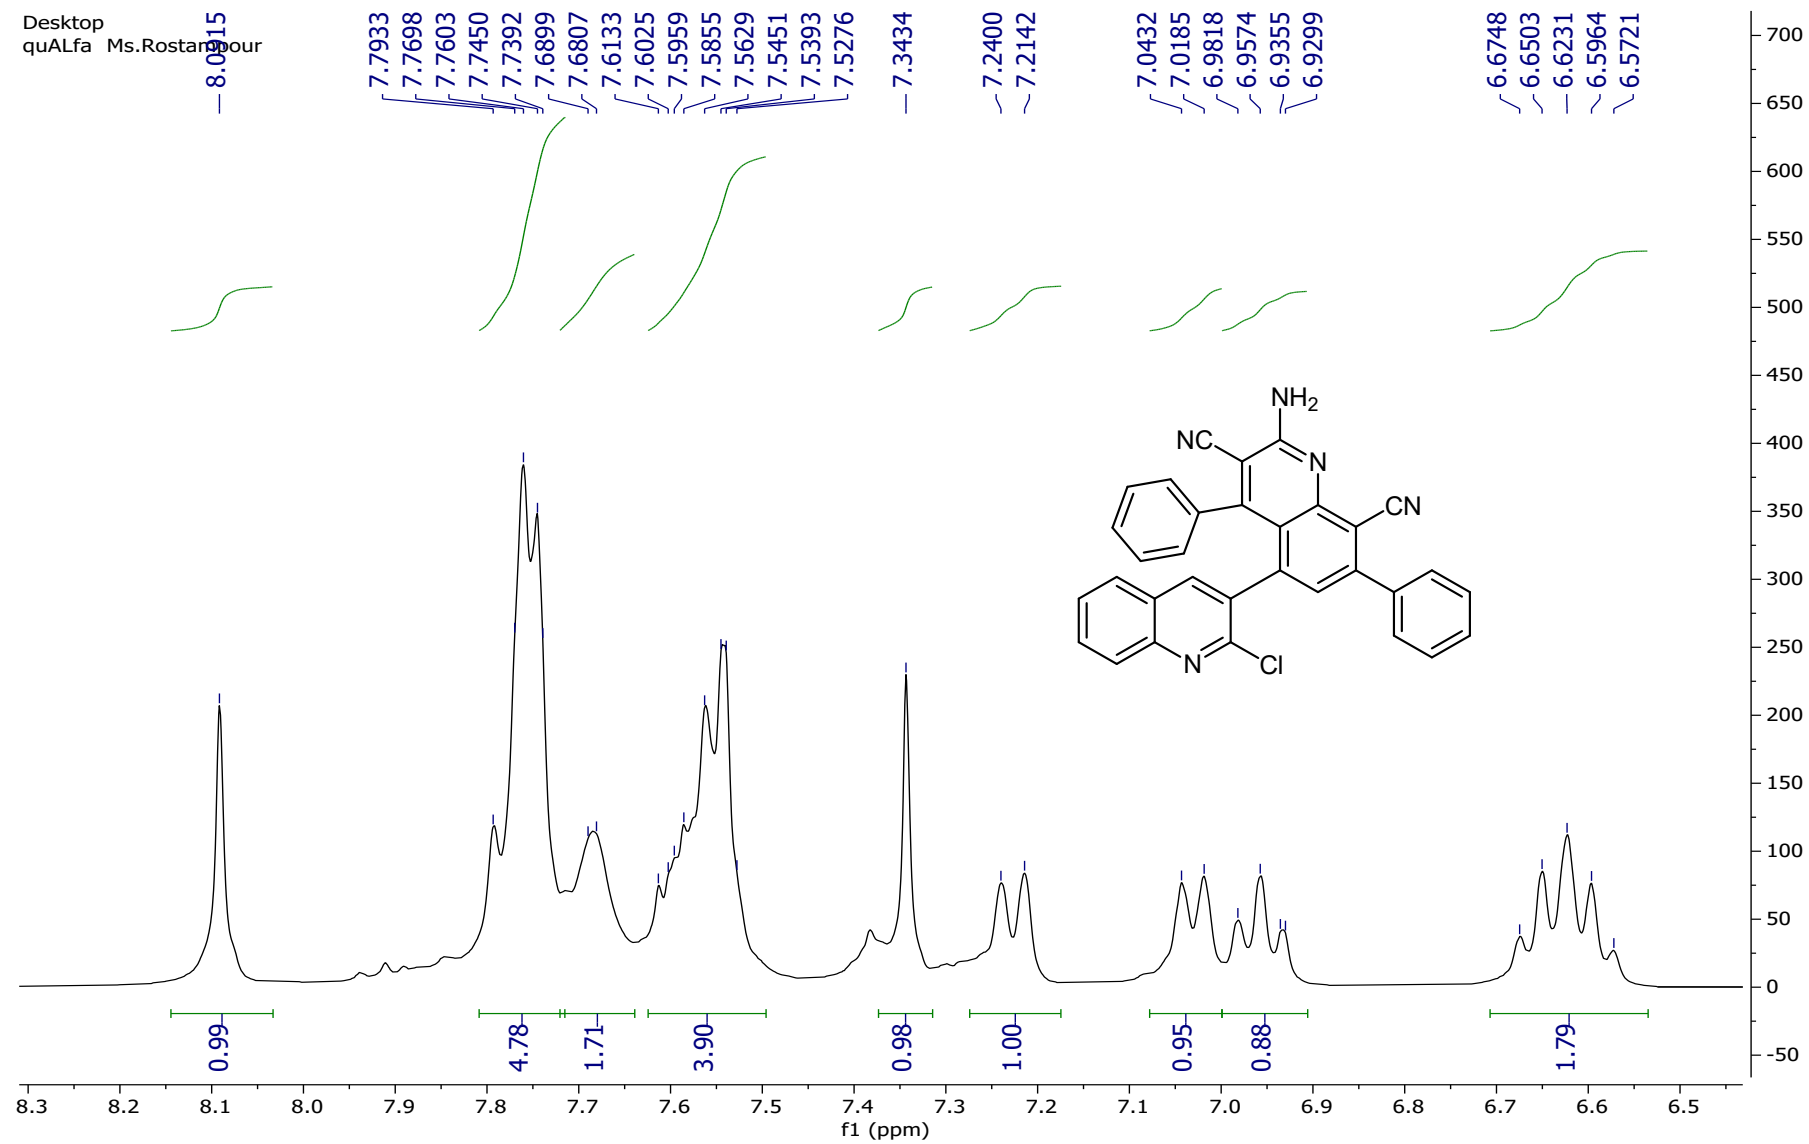

<sup>1</sup>H NMR Spectrum of **3a**

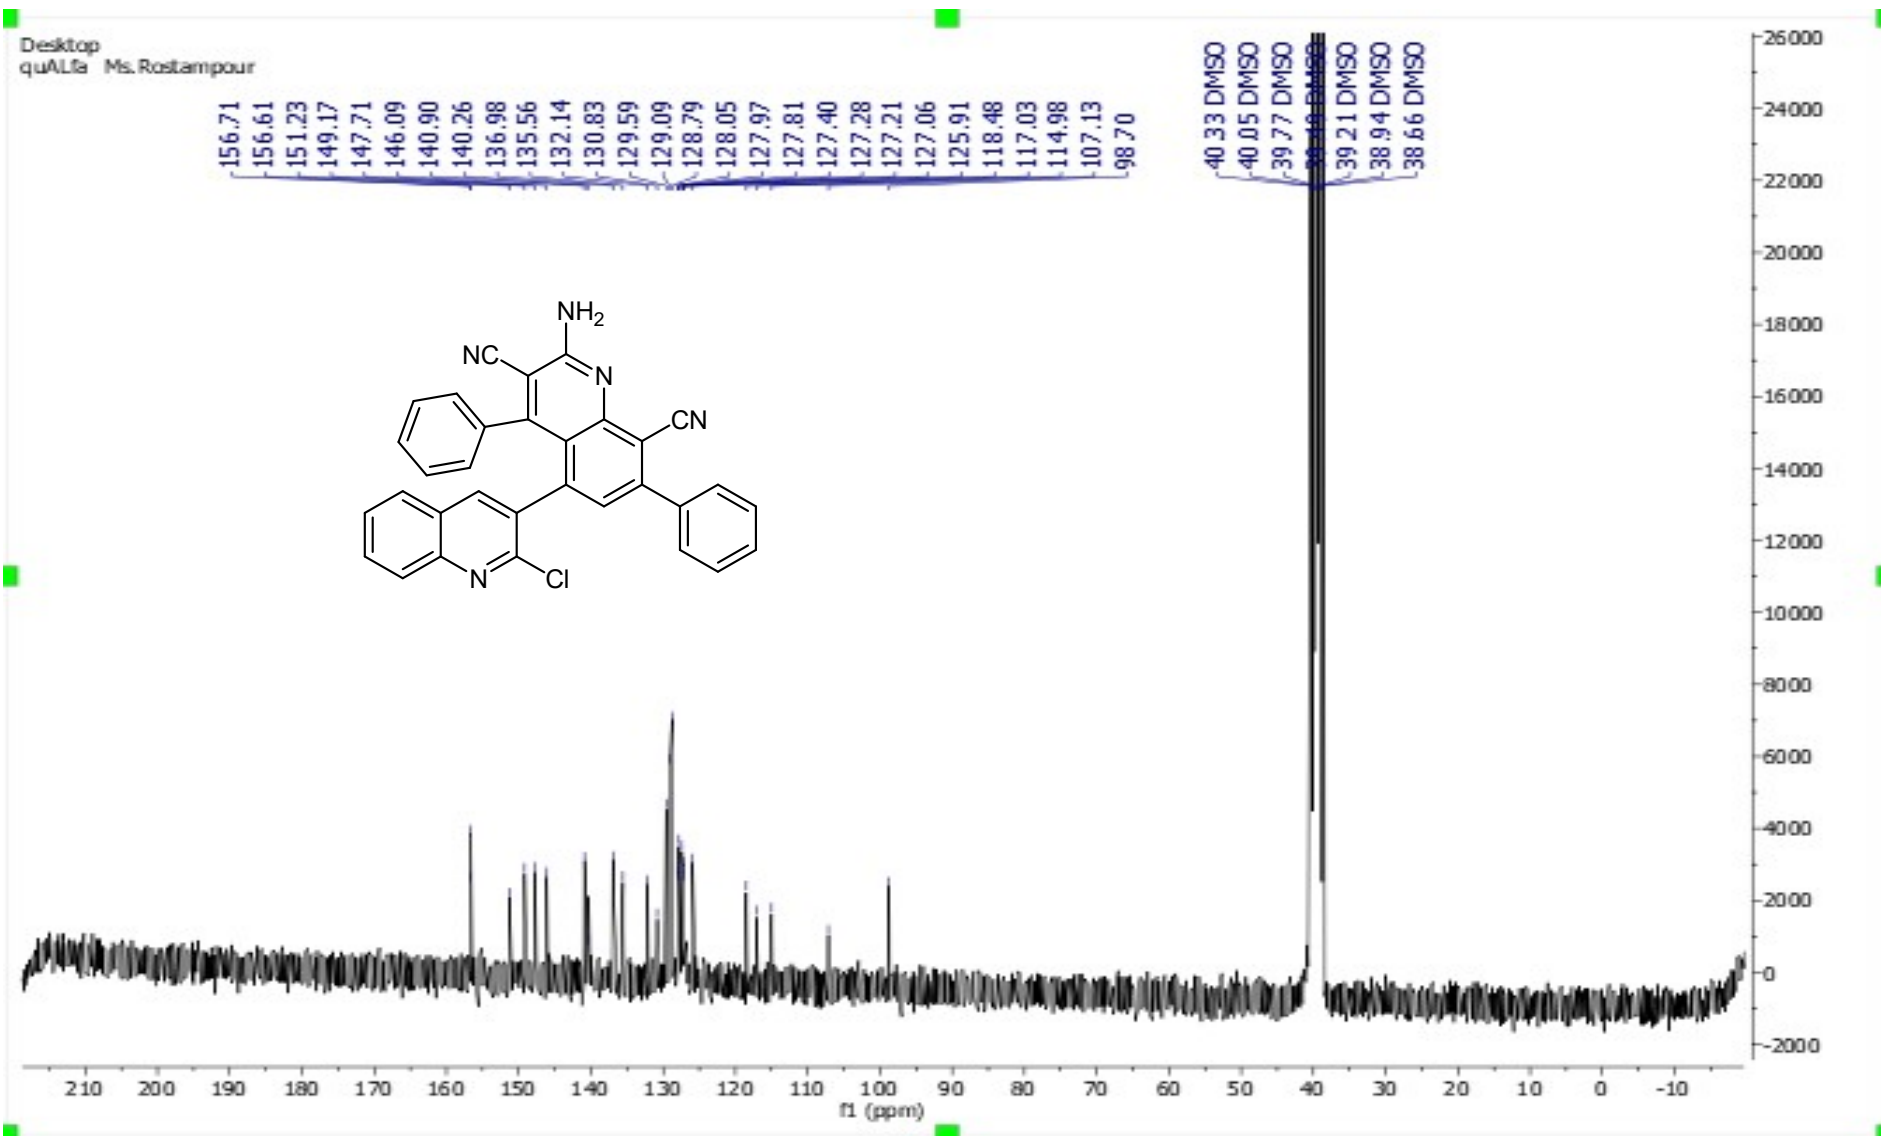

$^{13}\text{C}$  NMR spectrum of **3a**

Desktop  
quALfa Ms Rostampour

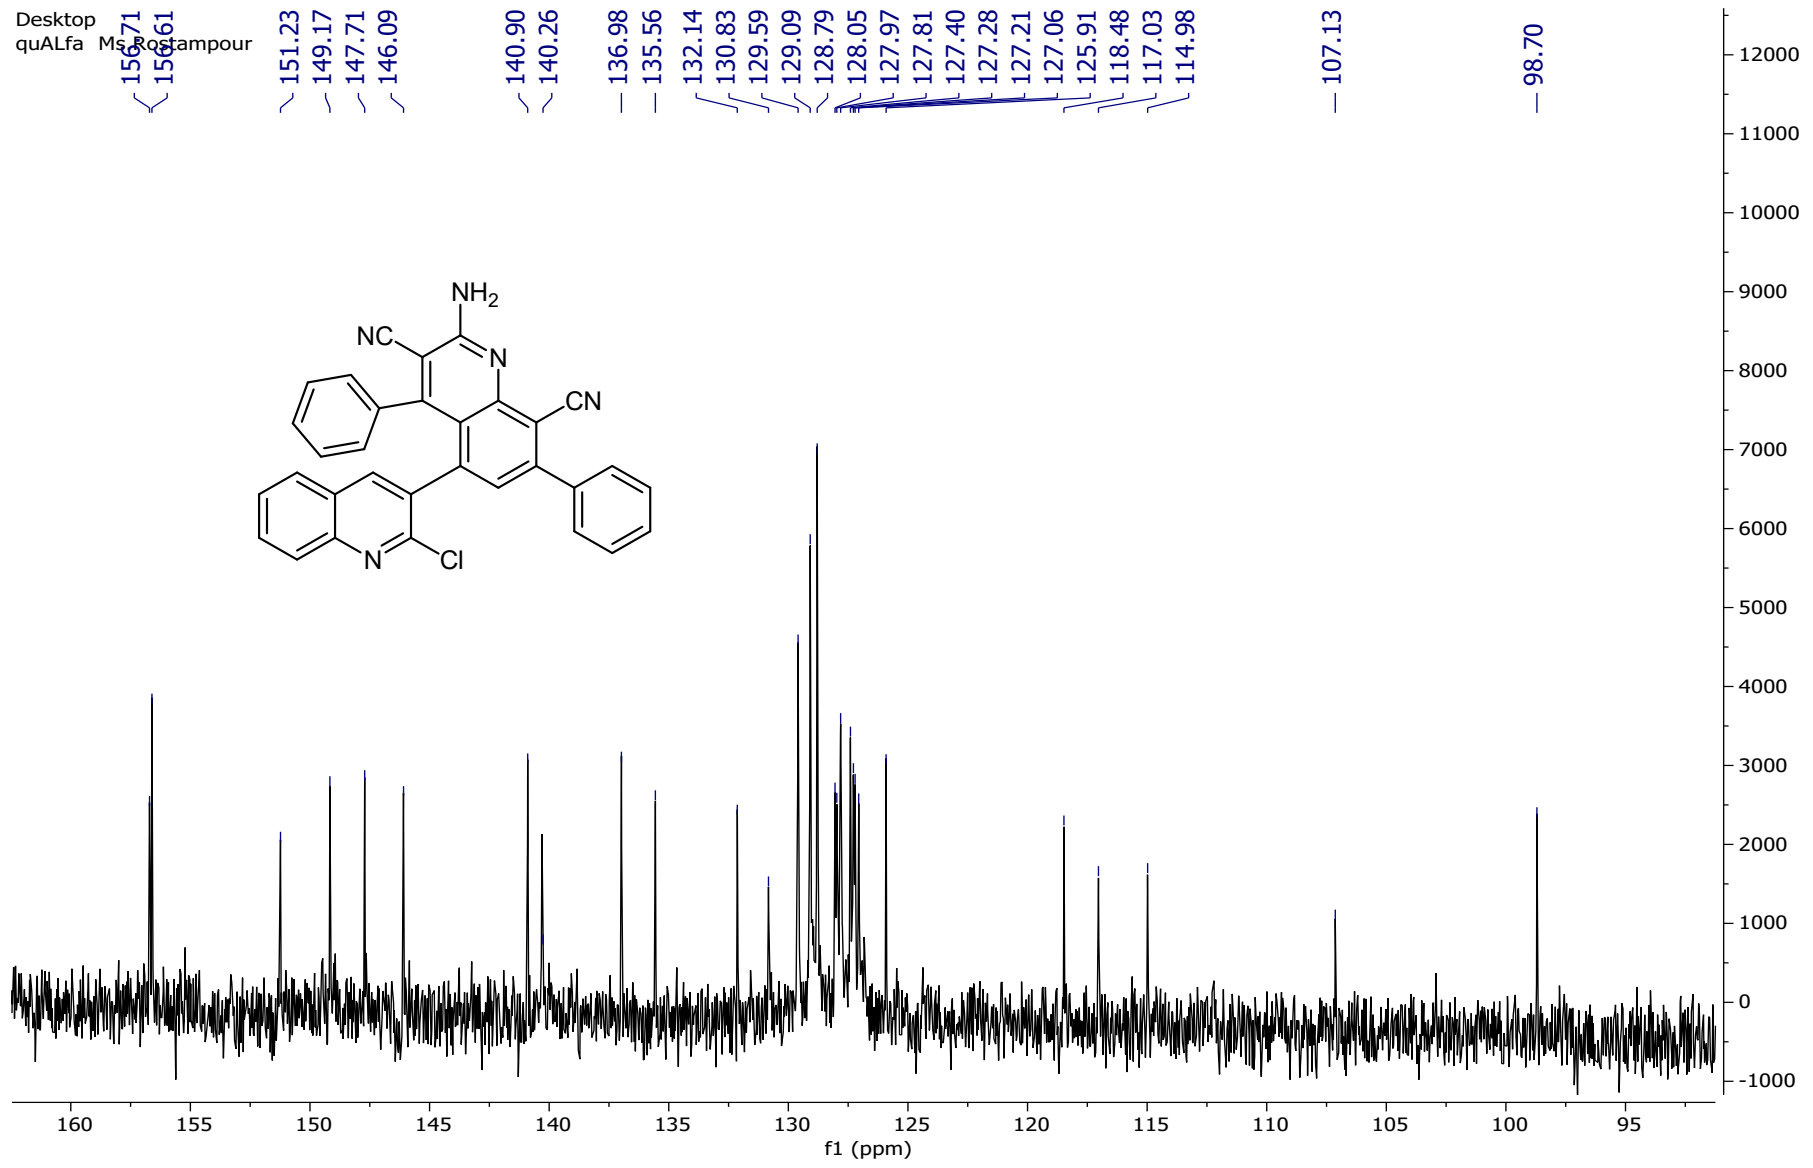

$^{13}\text{C}$  NMR spectrum of **3a**

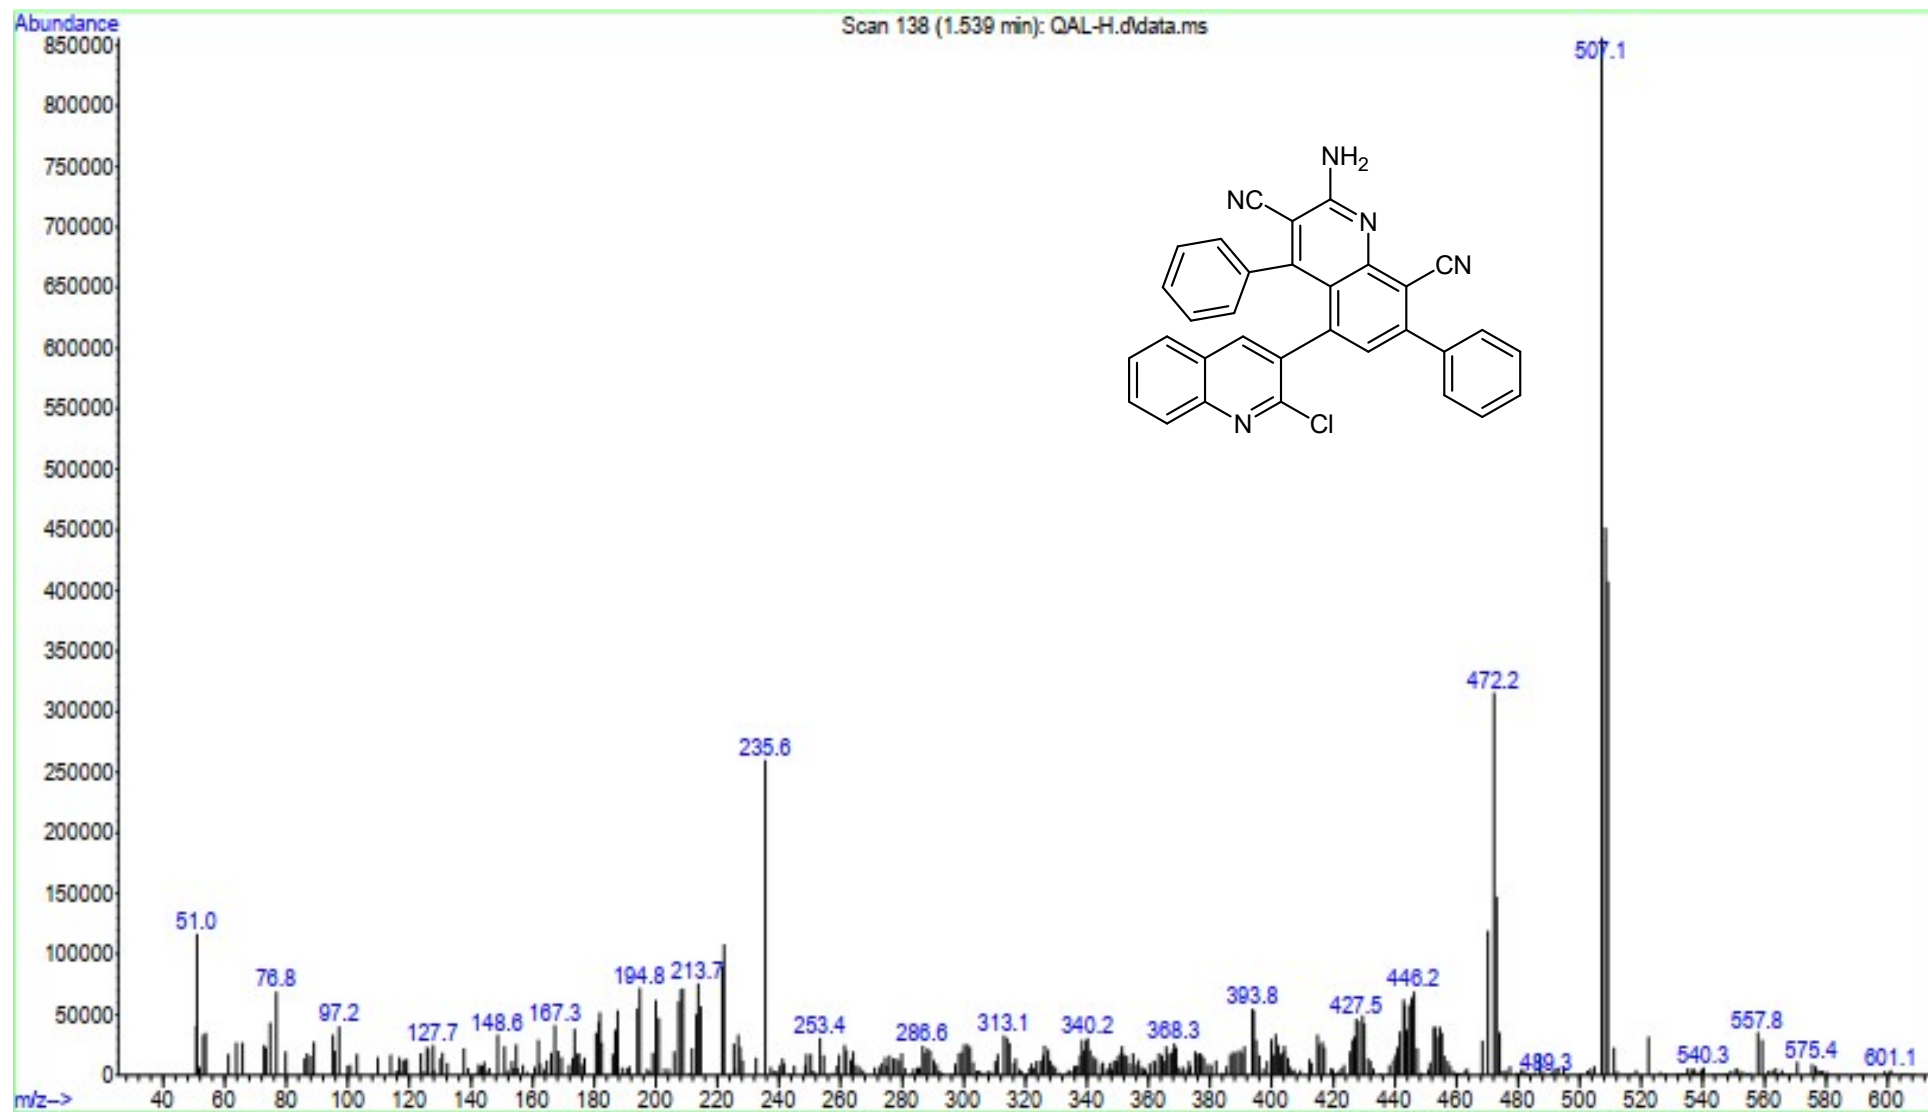

Mass Spectrum of 3a



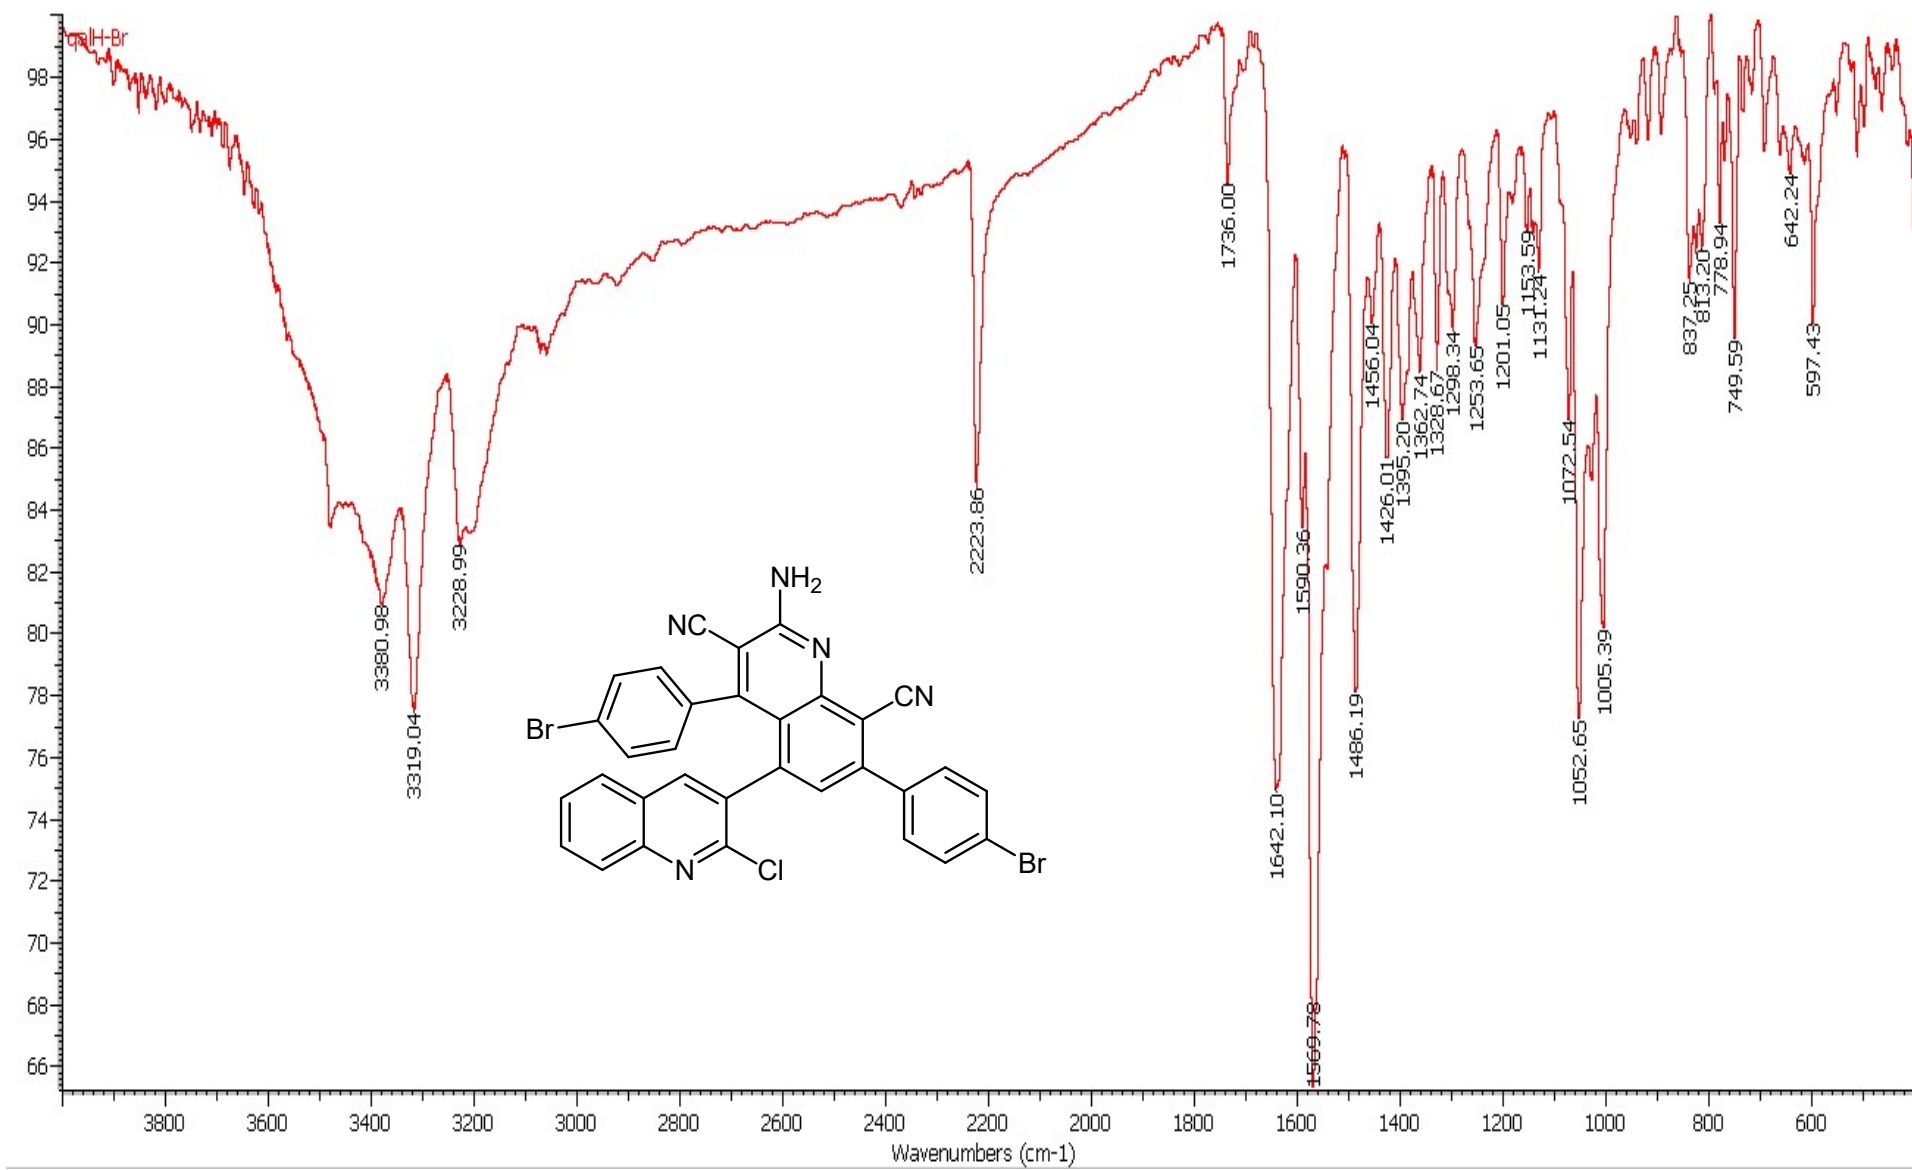

IR Spectrum of **3b**

Desktop/4338  
QAI 4-Br Ms.Rostampour

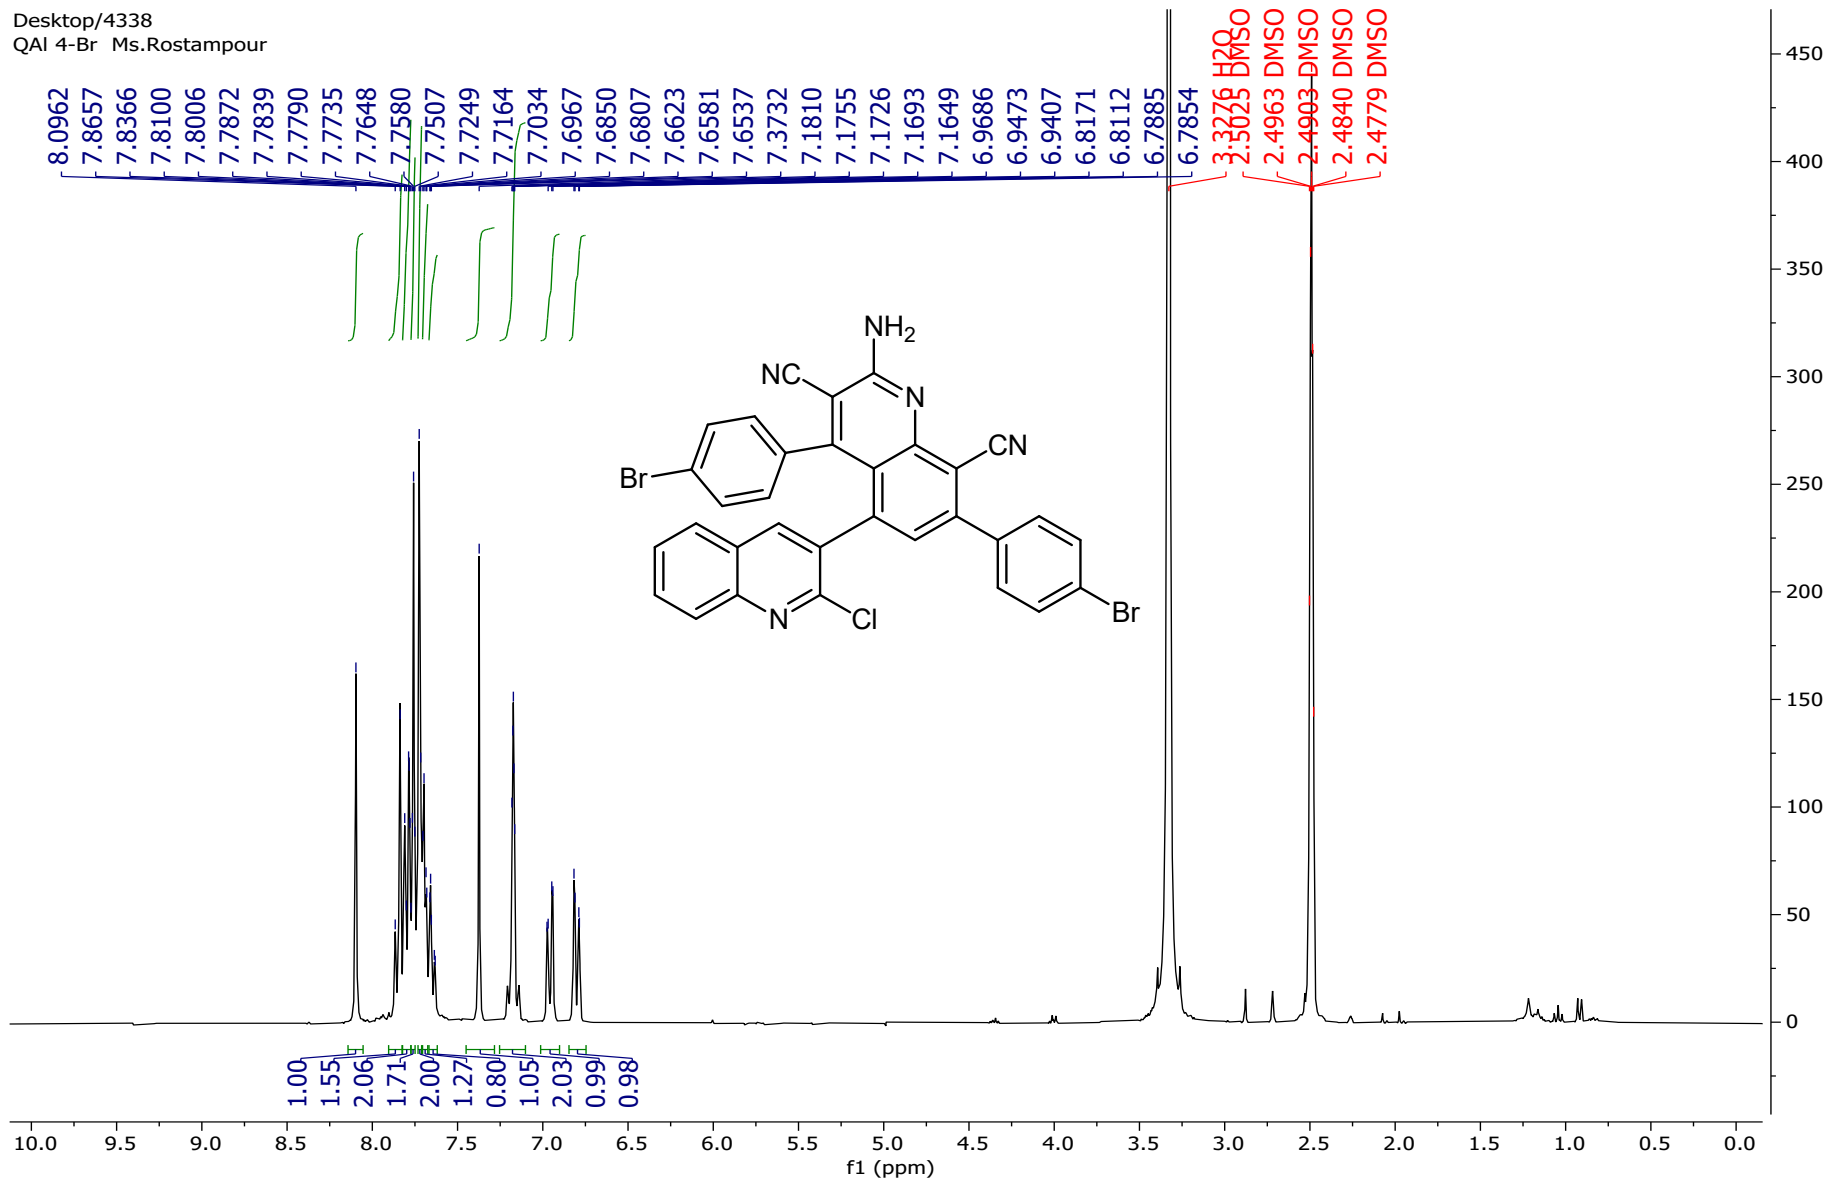

<sup>1</sup>H NMR Spectrum of **3b**

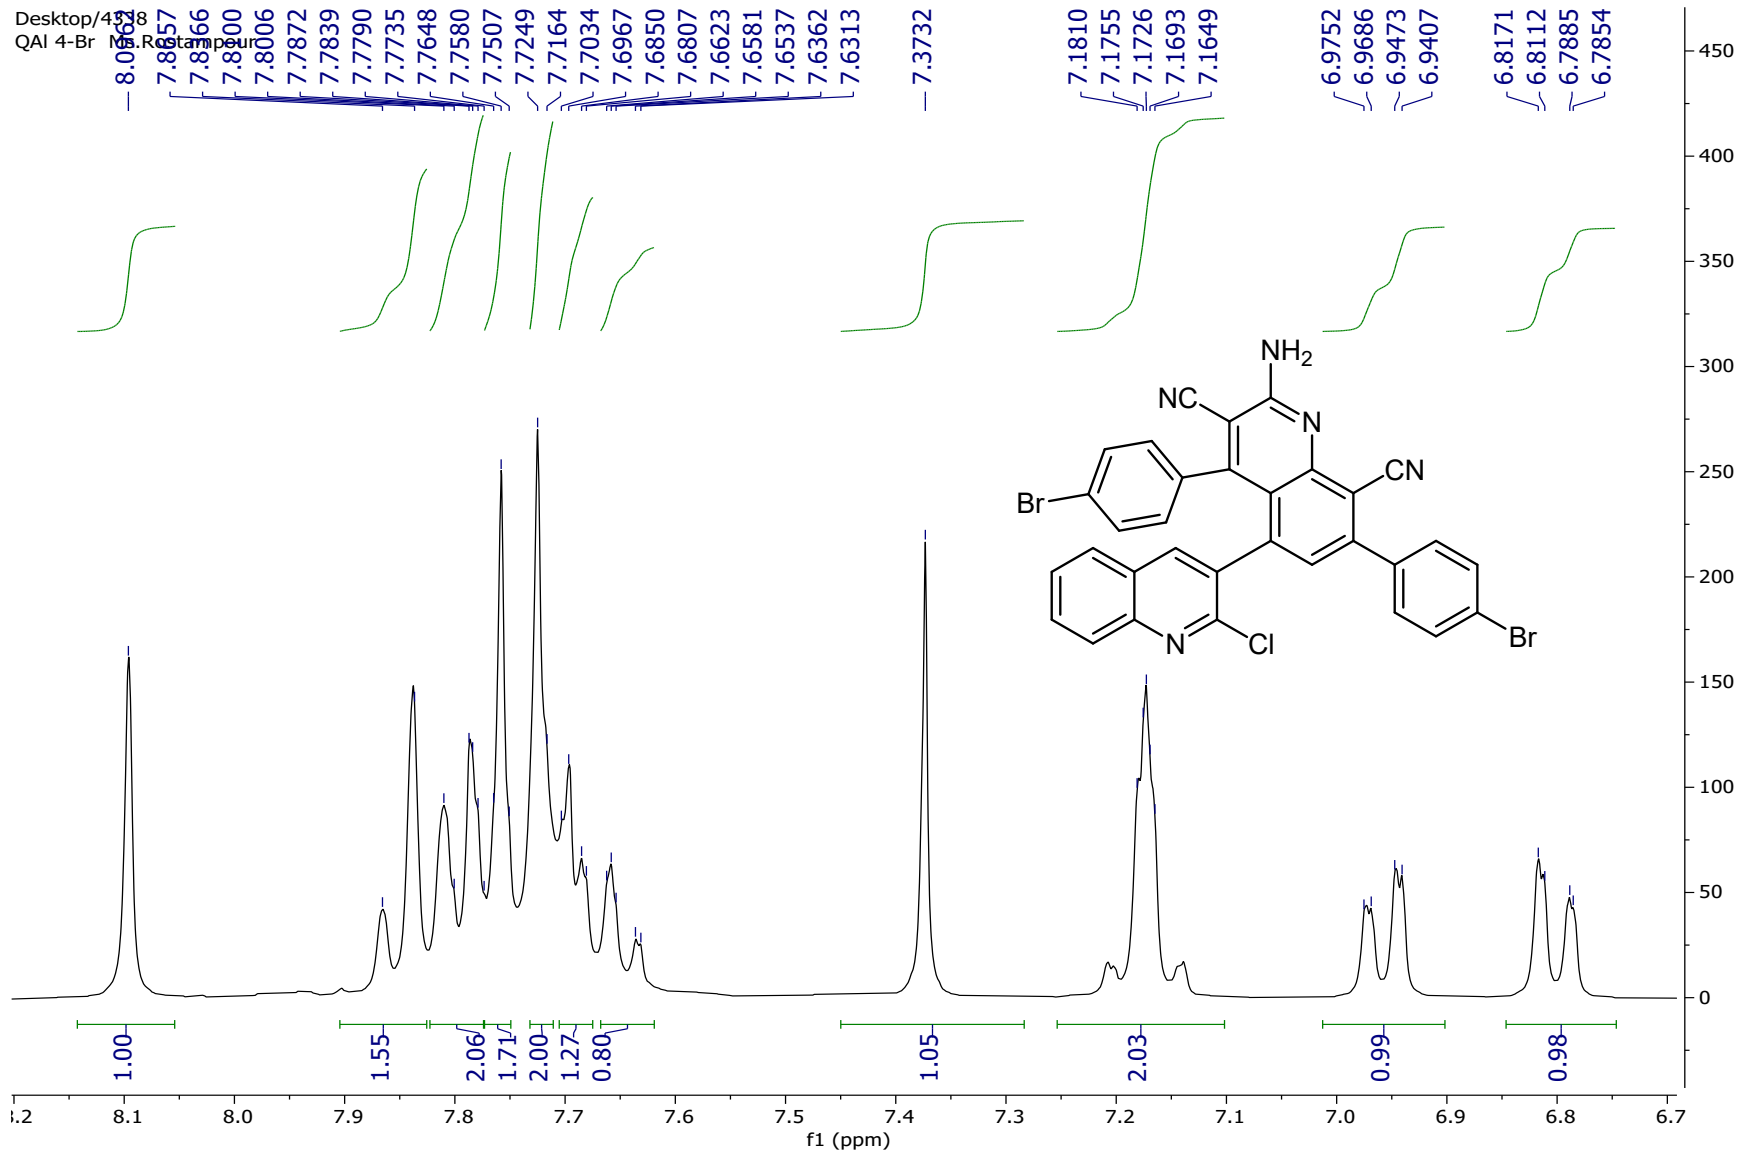

<sup>1</sup>H NMR Spectrum of **3b**

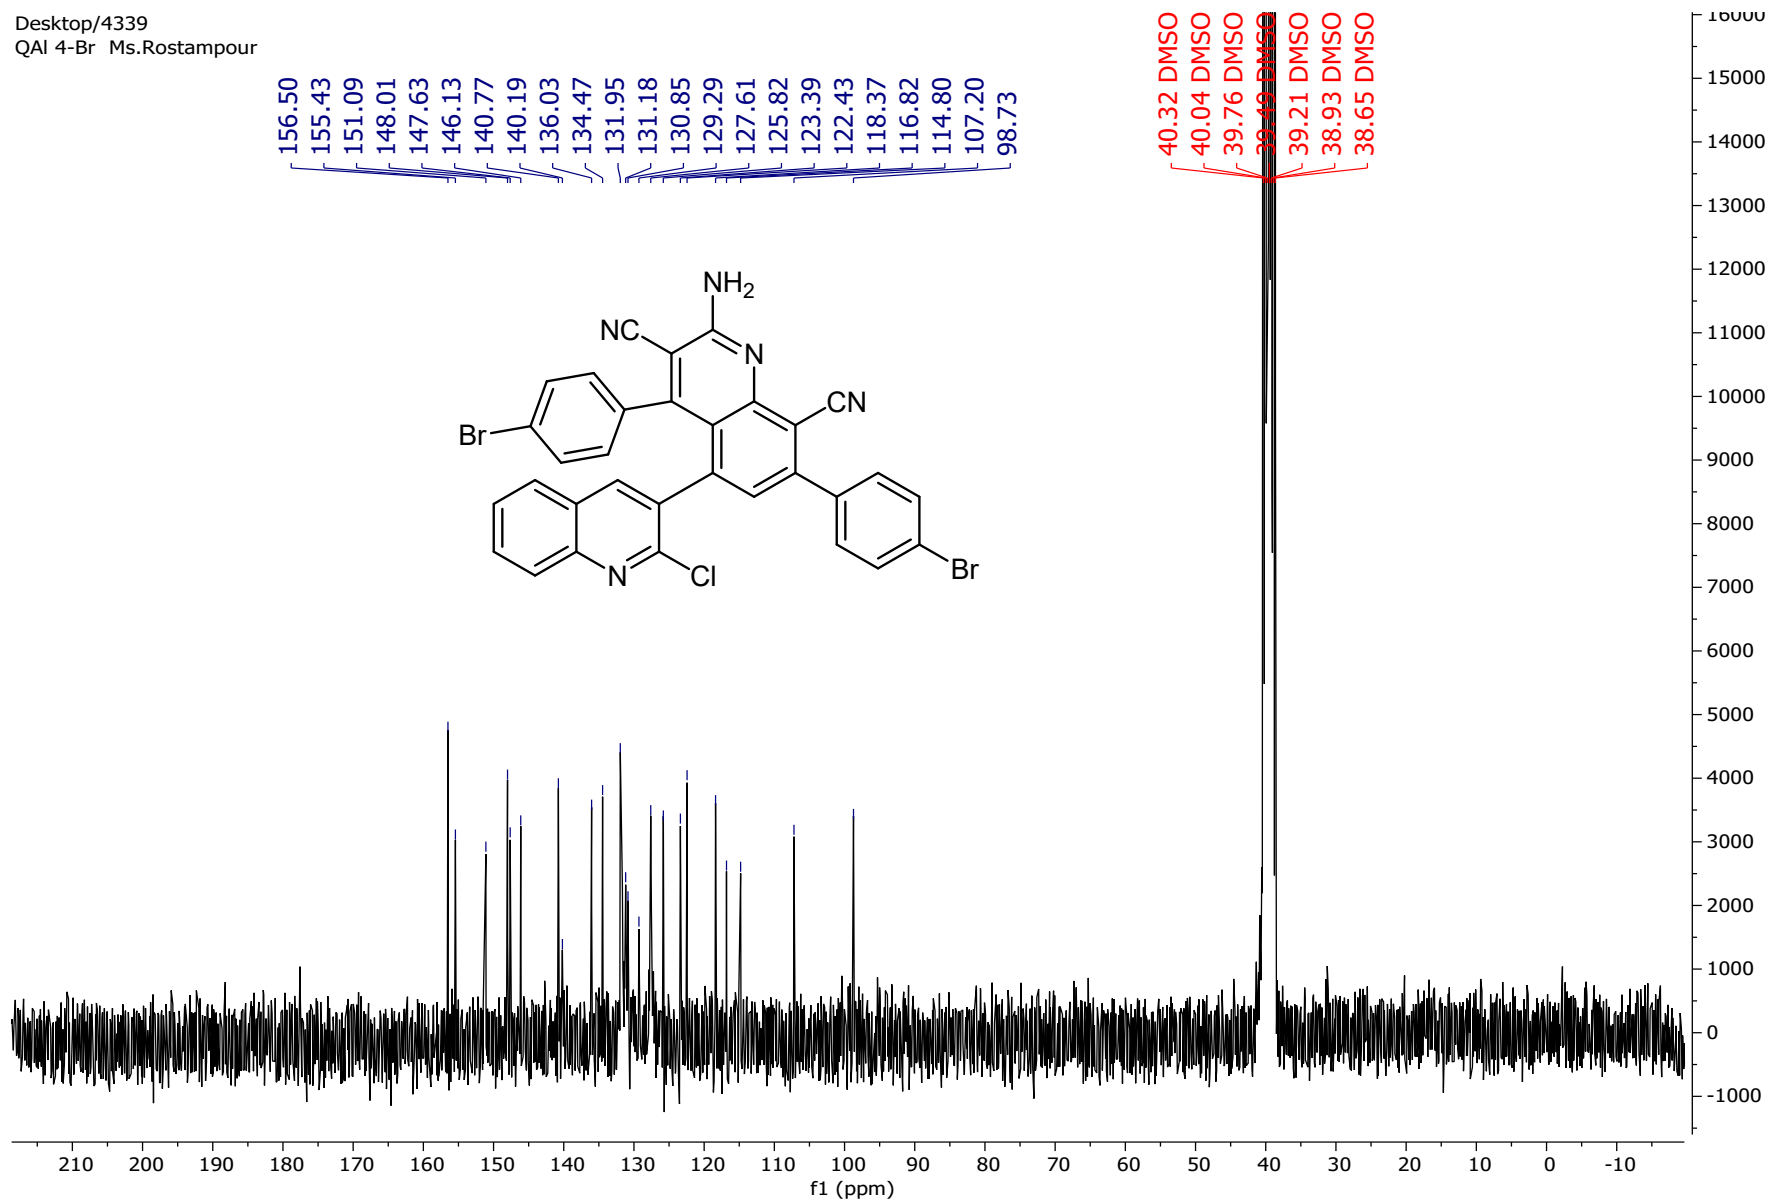

$^{13}\text{C}$  NMR Spectrum of **3b**

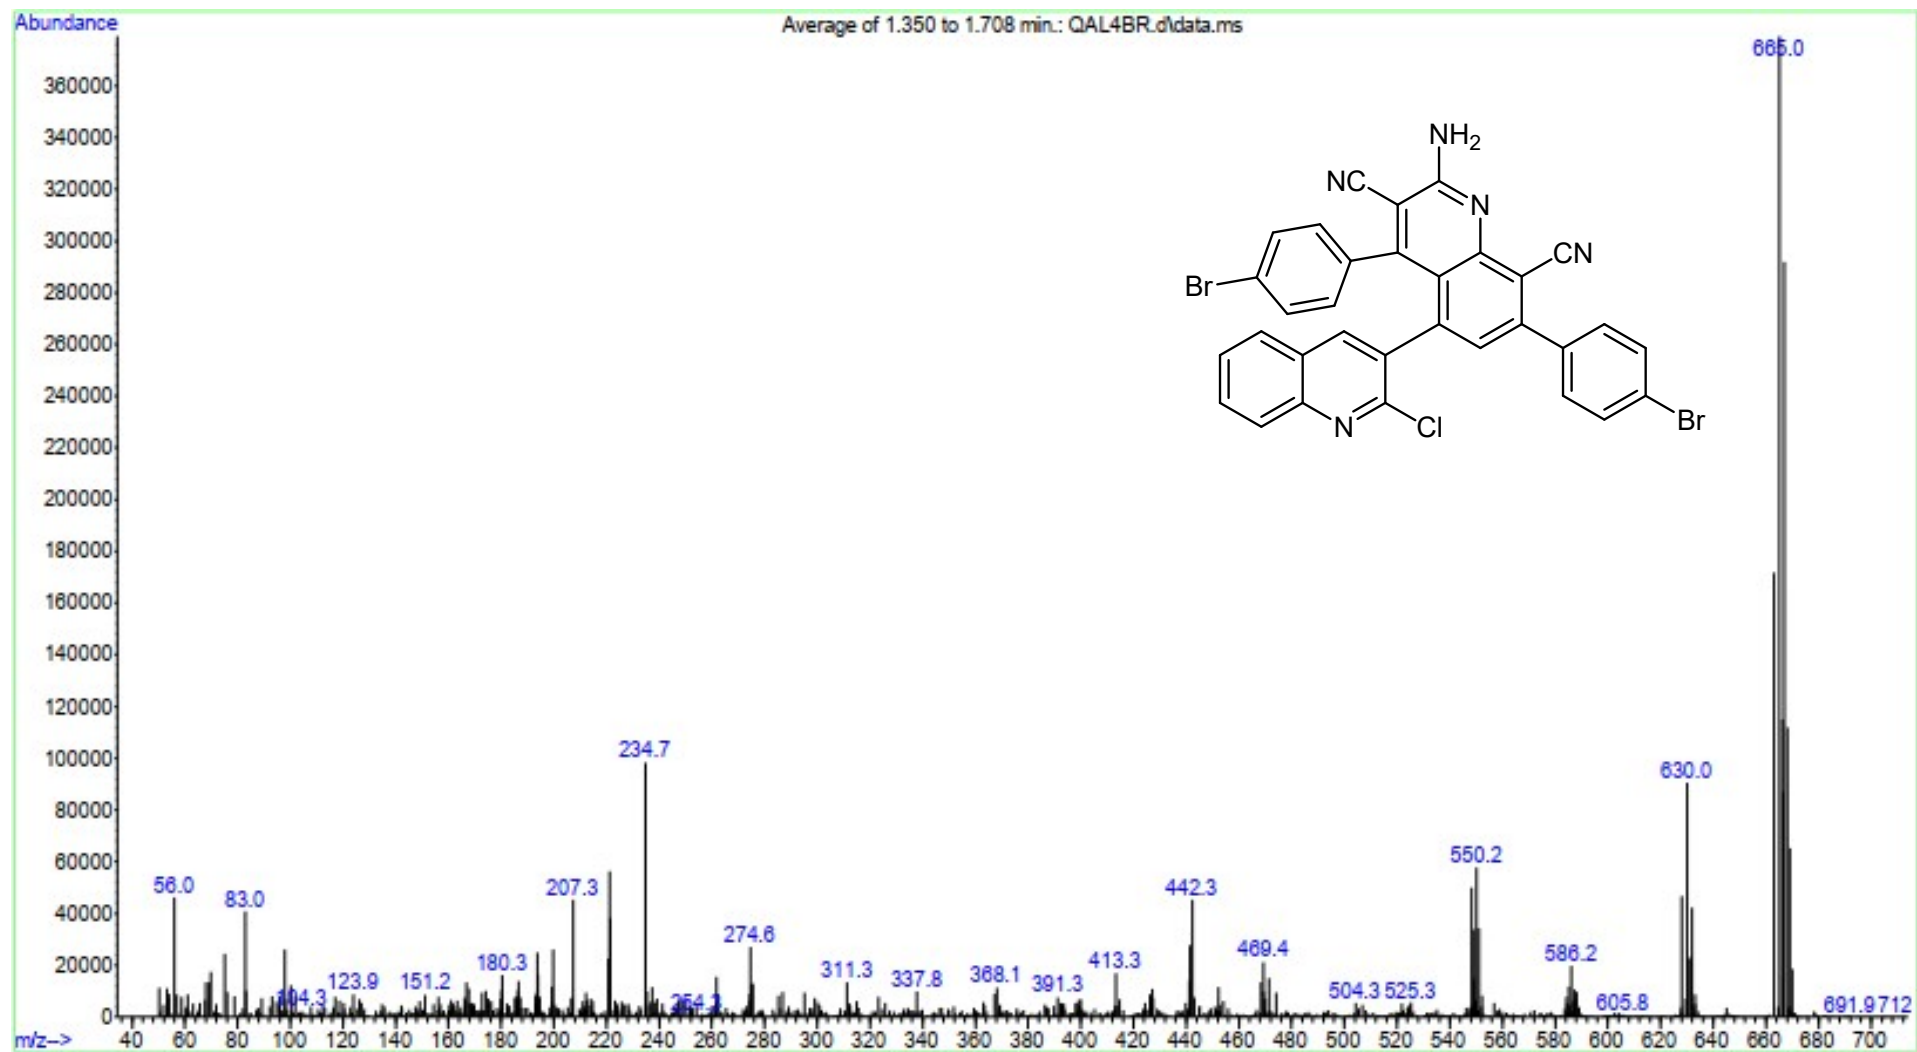

Mass Spectrum of **3b**

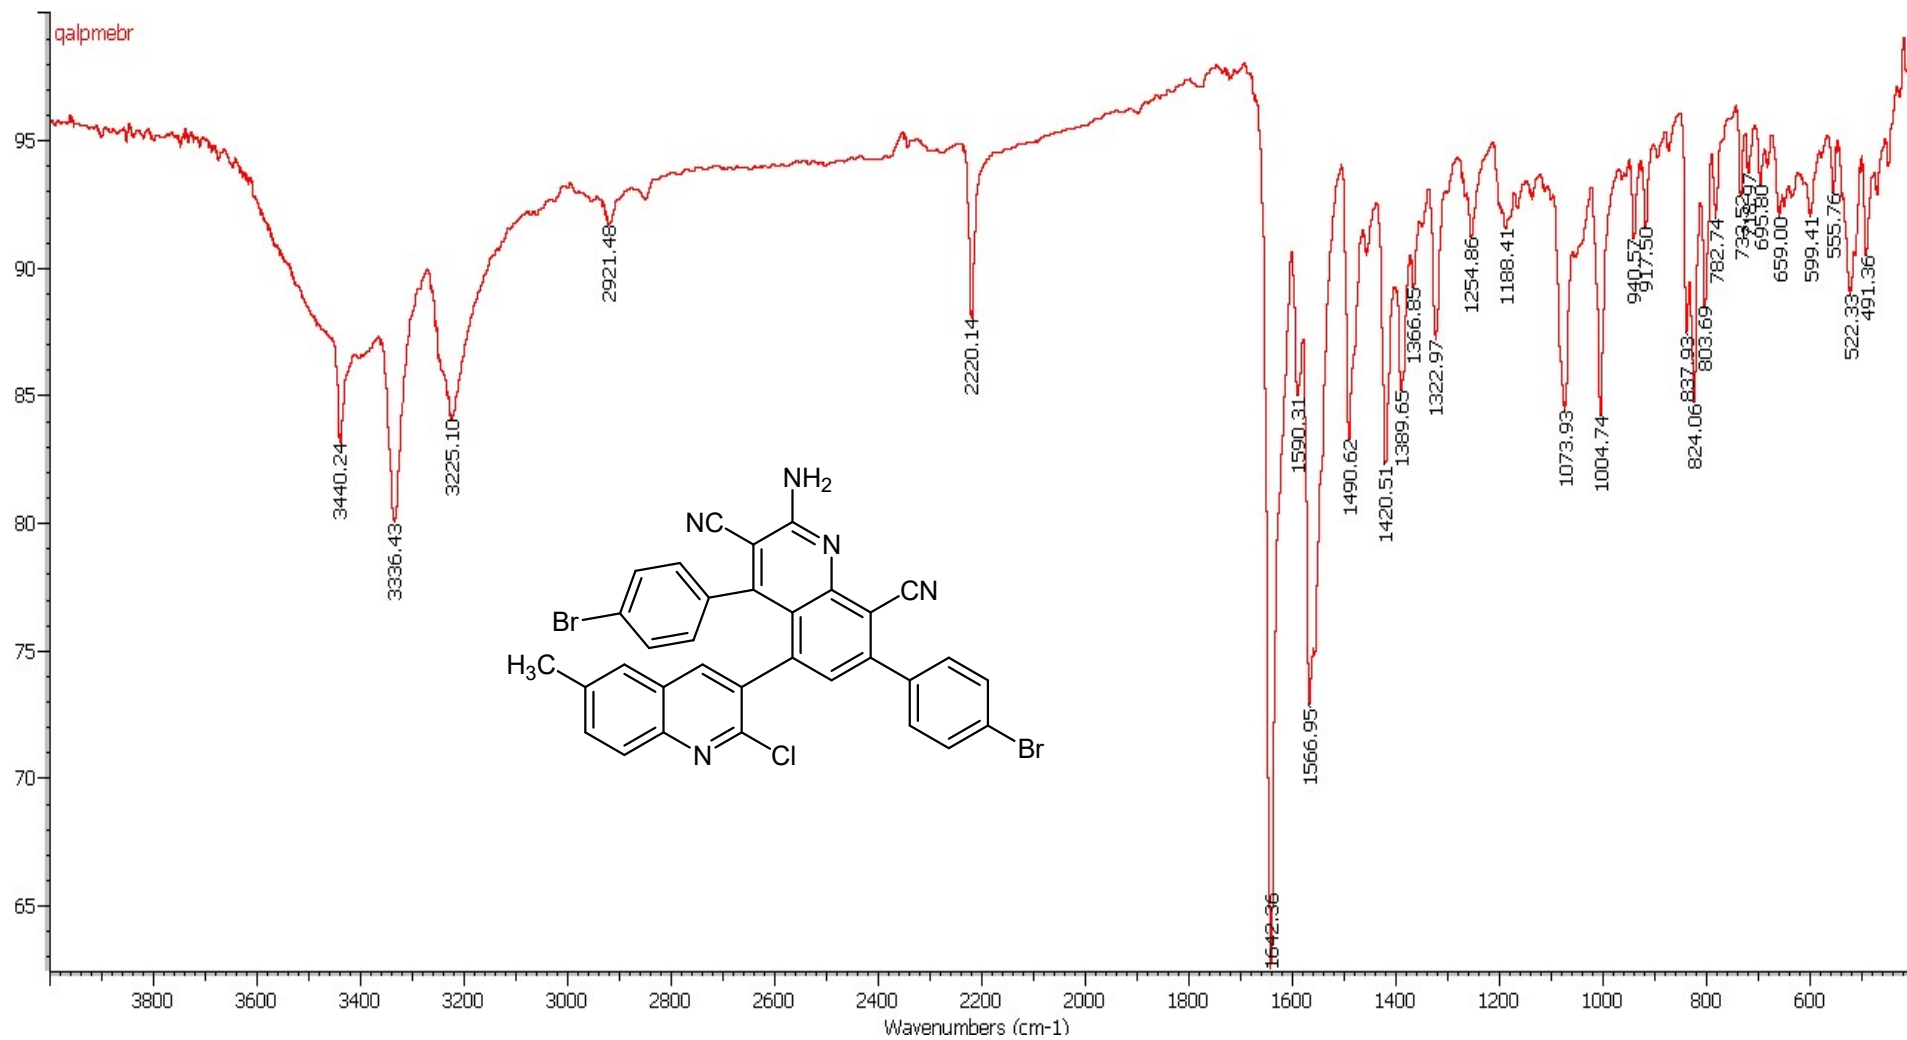

IR Spectrum of 3c

Desktop/4389  
QAIPbm Ms.Rostampour

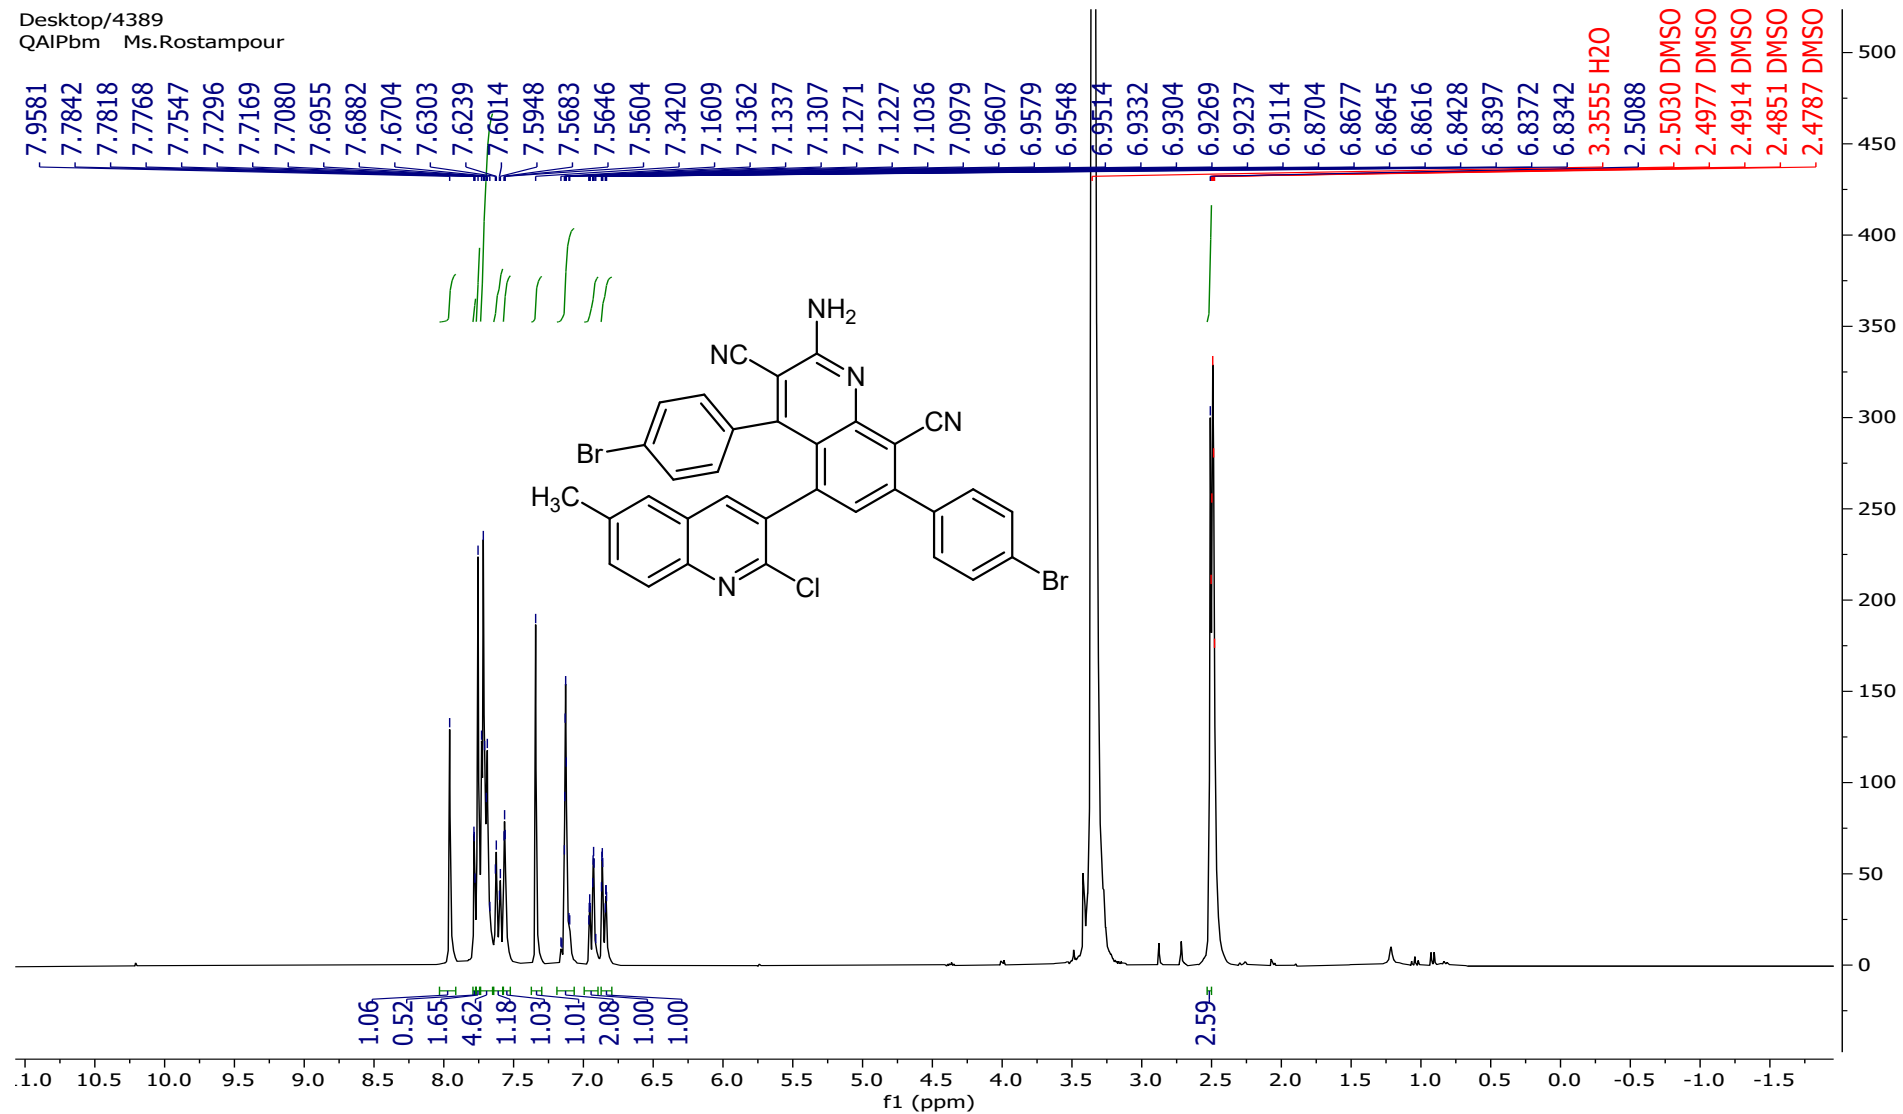

<sup>1</sup>H NMR Spectrum **3c**

Desktop/1389  
QAIPbm Ms.Rostanpur

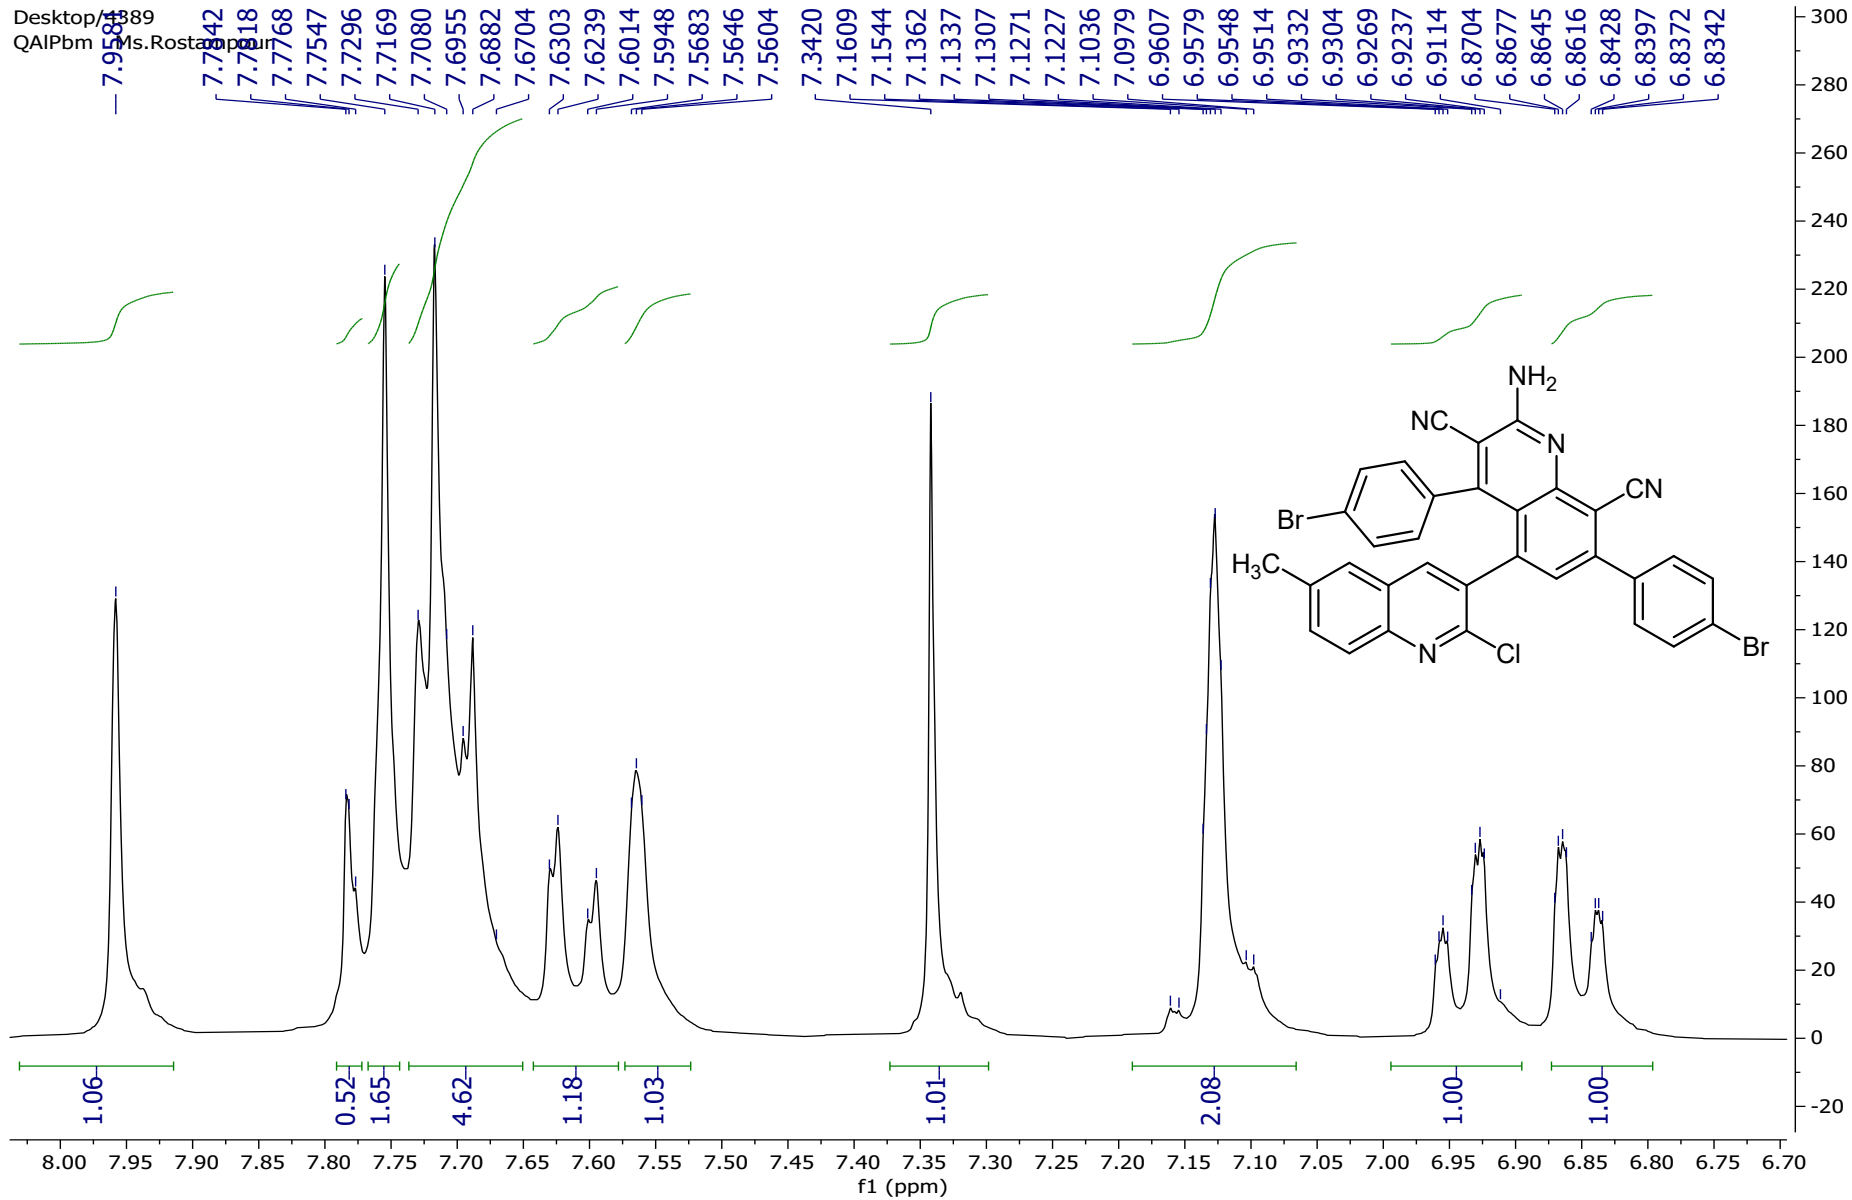

$^1\text{H}$  NMR Spectrum **3c**



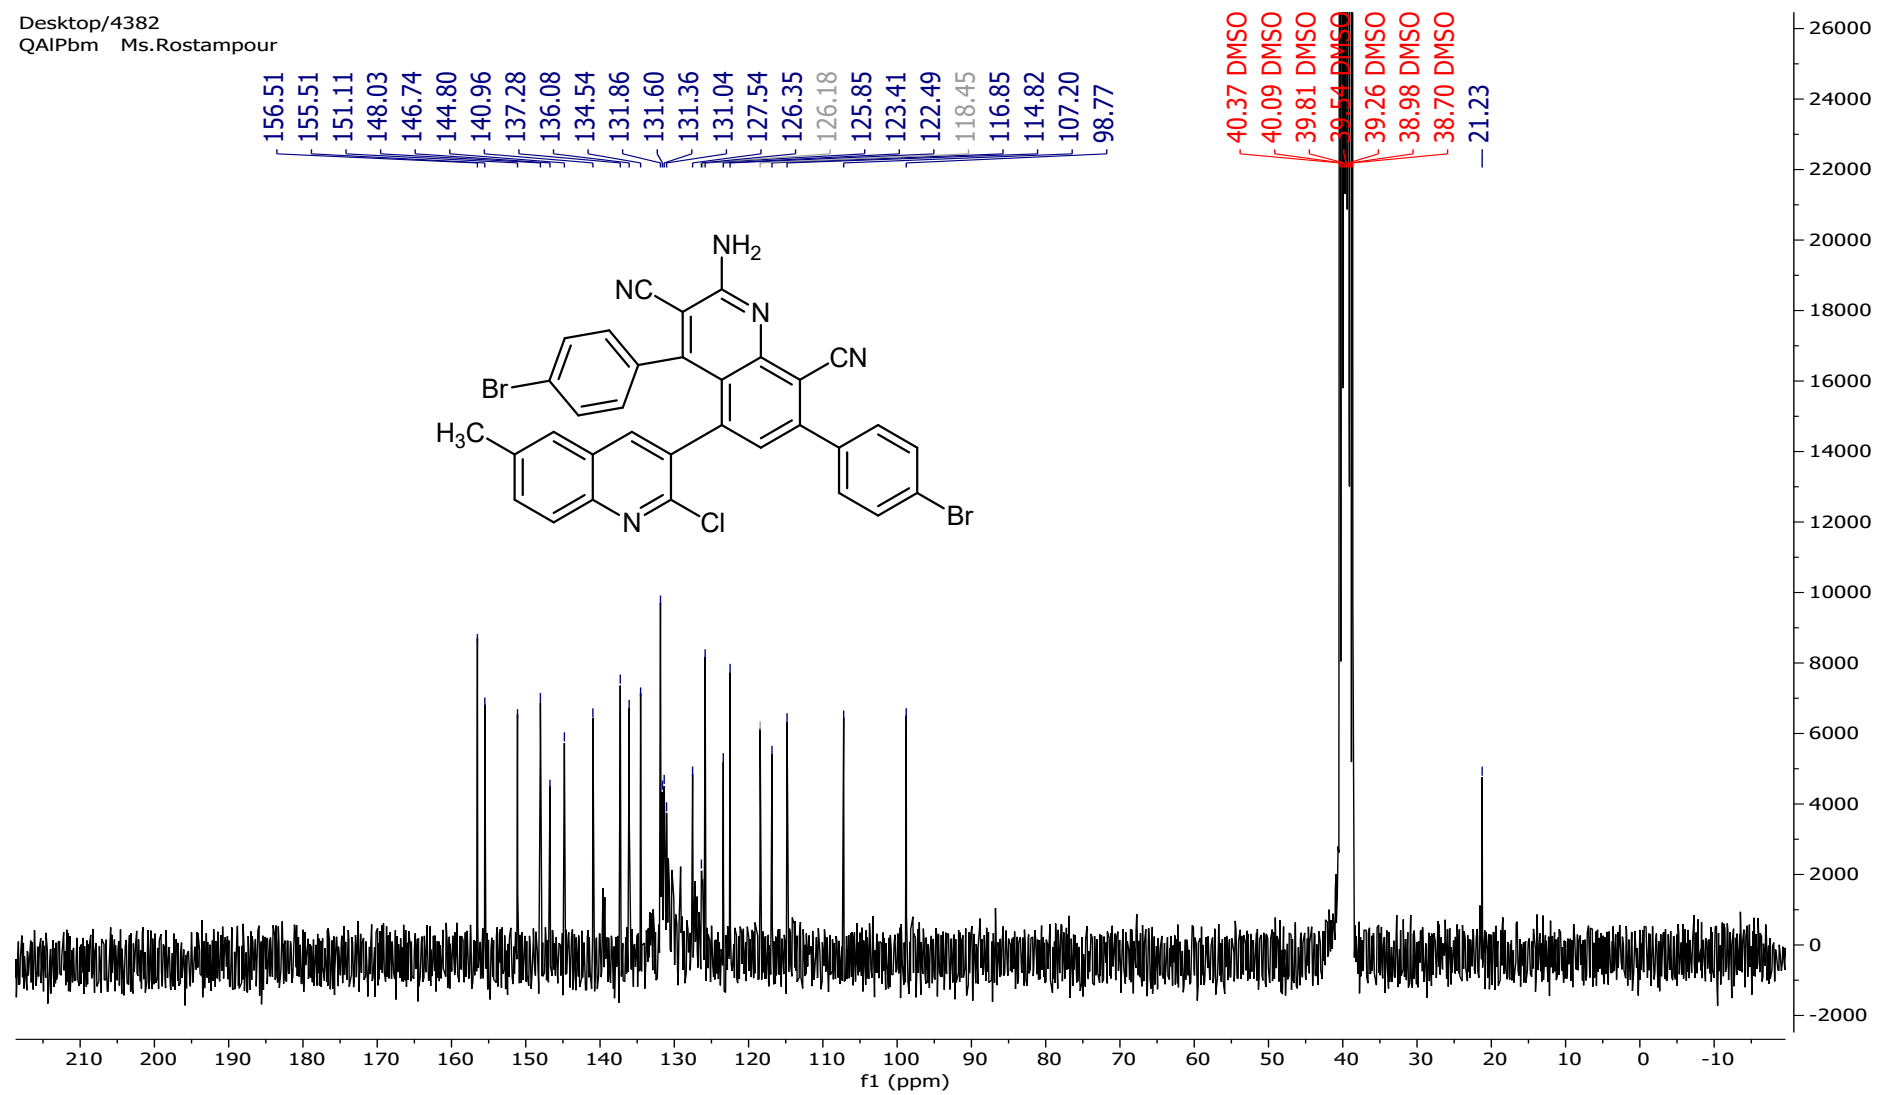

<sup>13</sup>C NMR Spectrum 3c

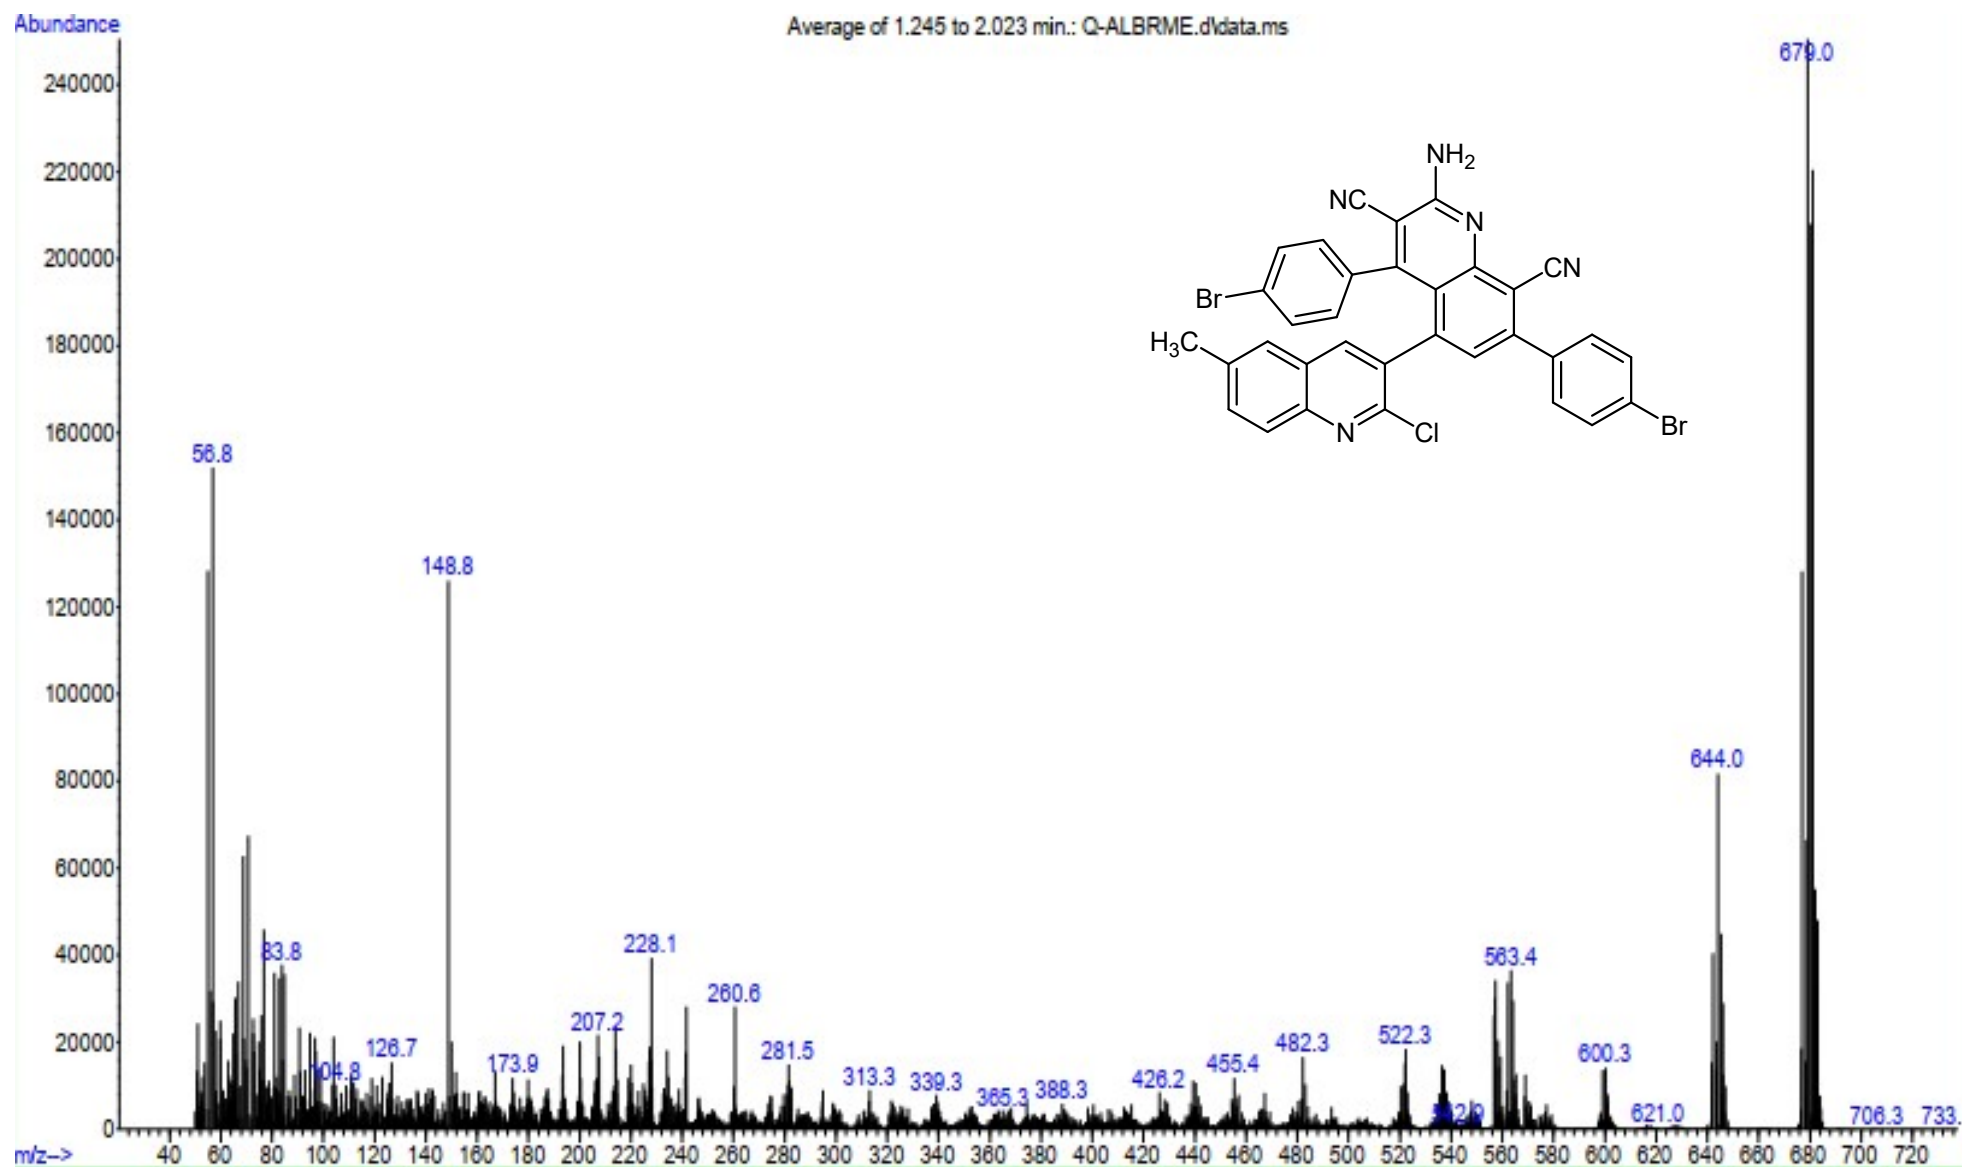

Mass Spectrum of 3c

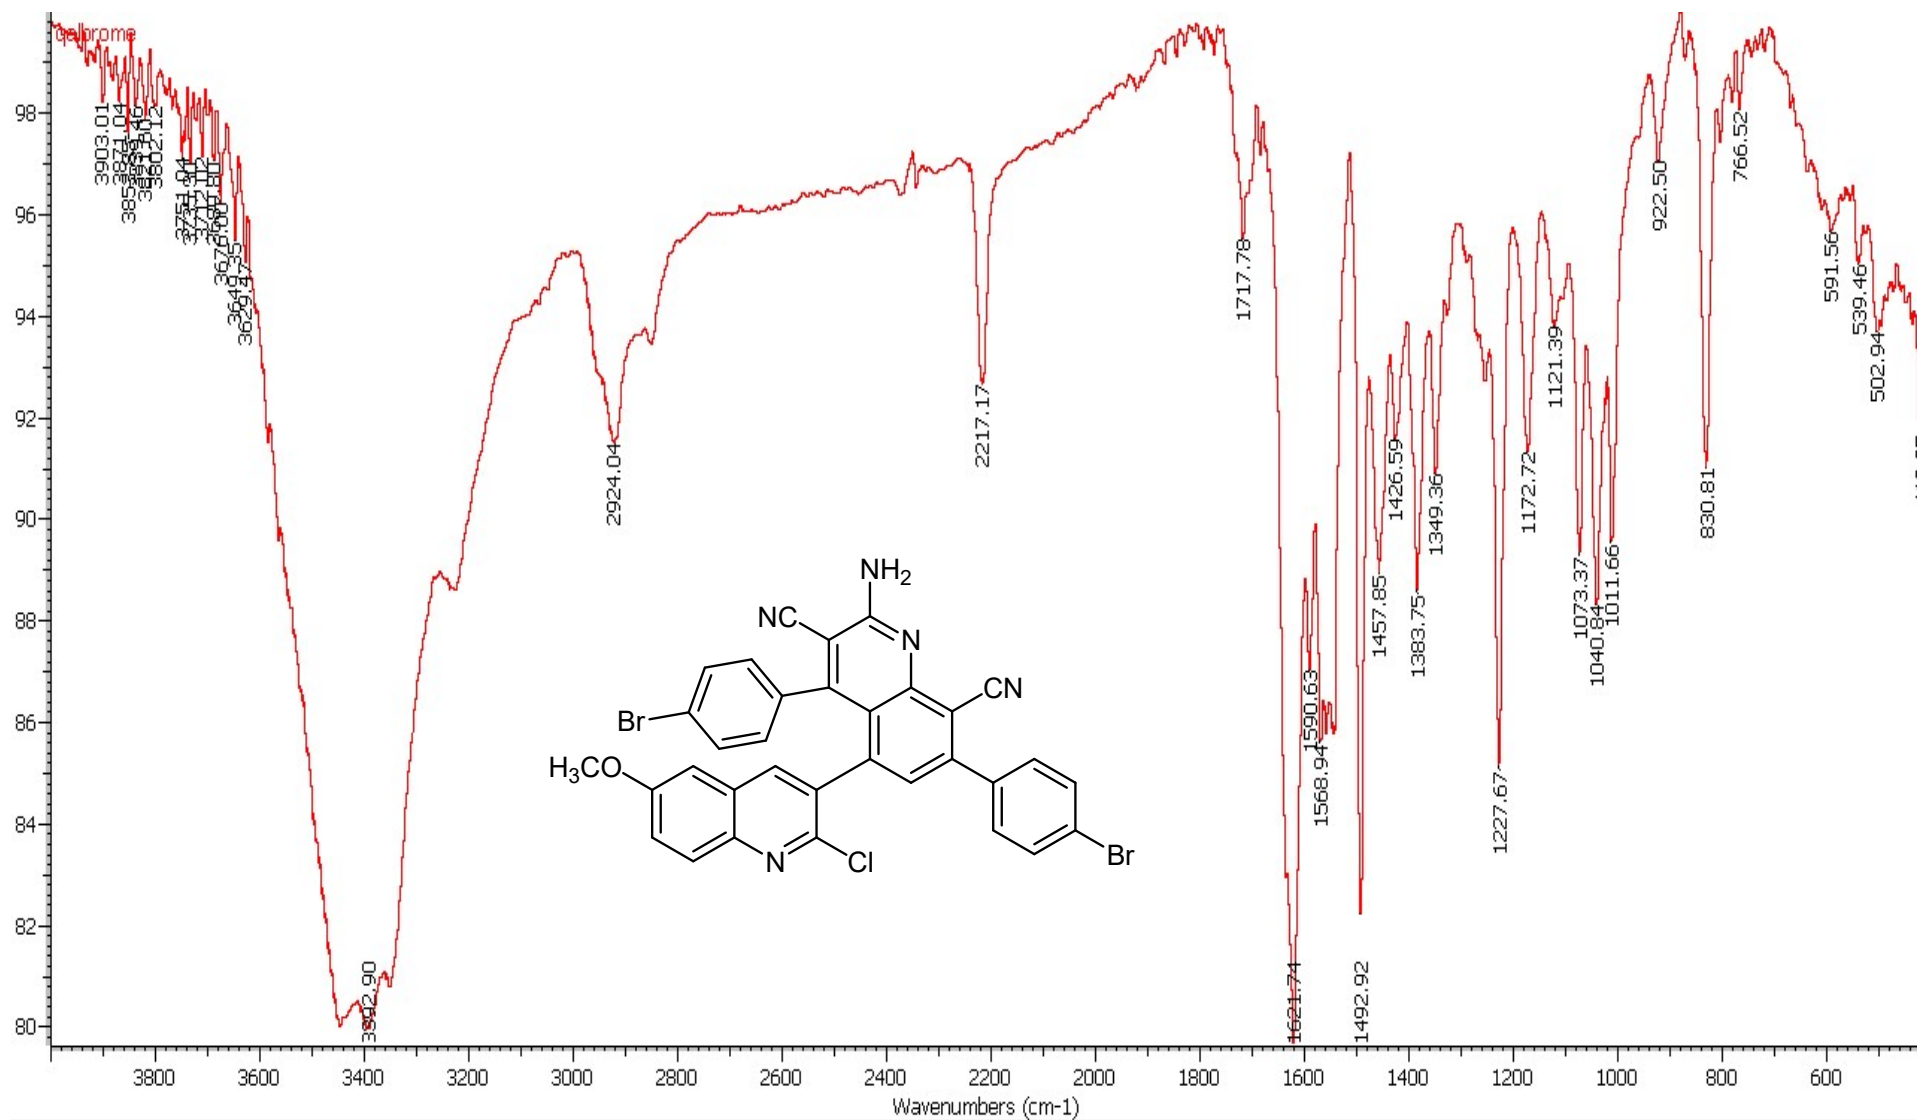

IR Spectrum of 3d

New folder (2)/4433  
QAIOMeBr Ms.Rostampour

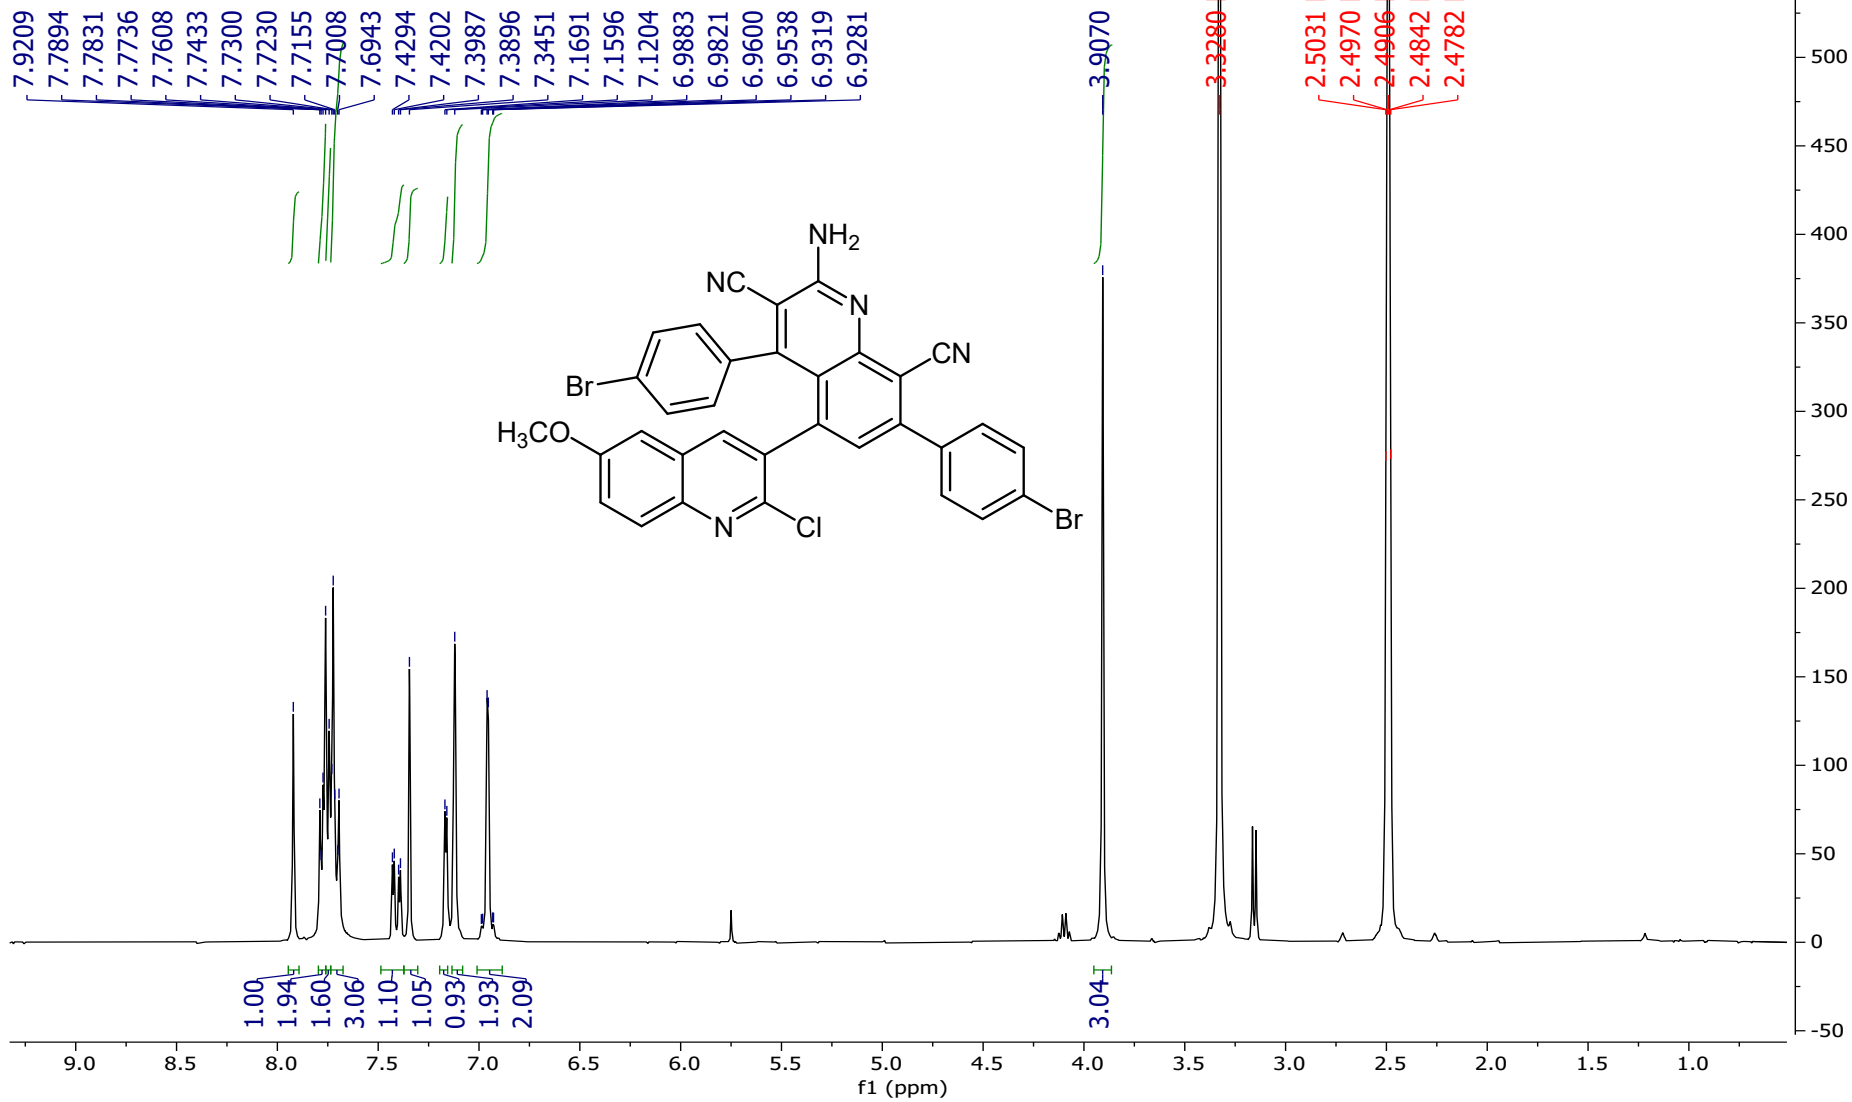

<sup>1</sup>H NMR Spectrum **3d**

New folder (2)/433  
QAIOMeBr Ms. Postamp

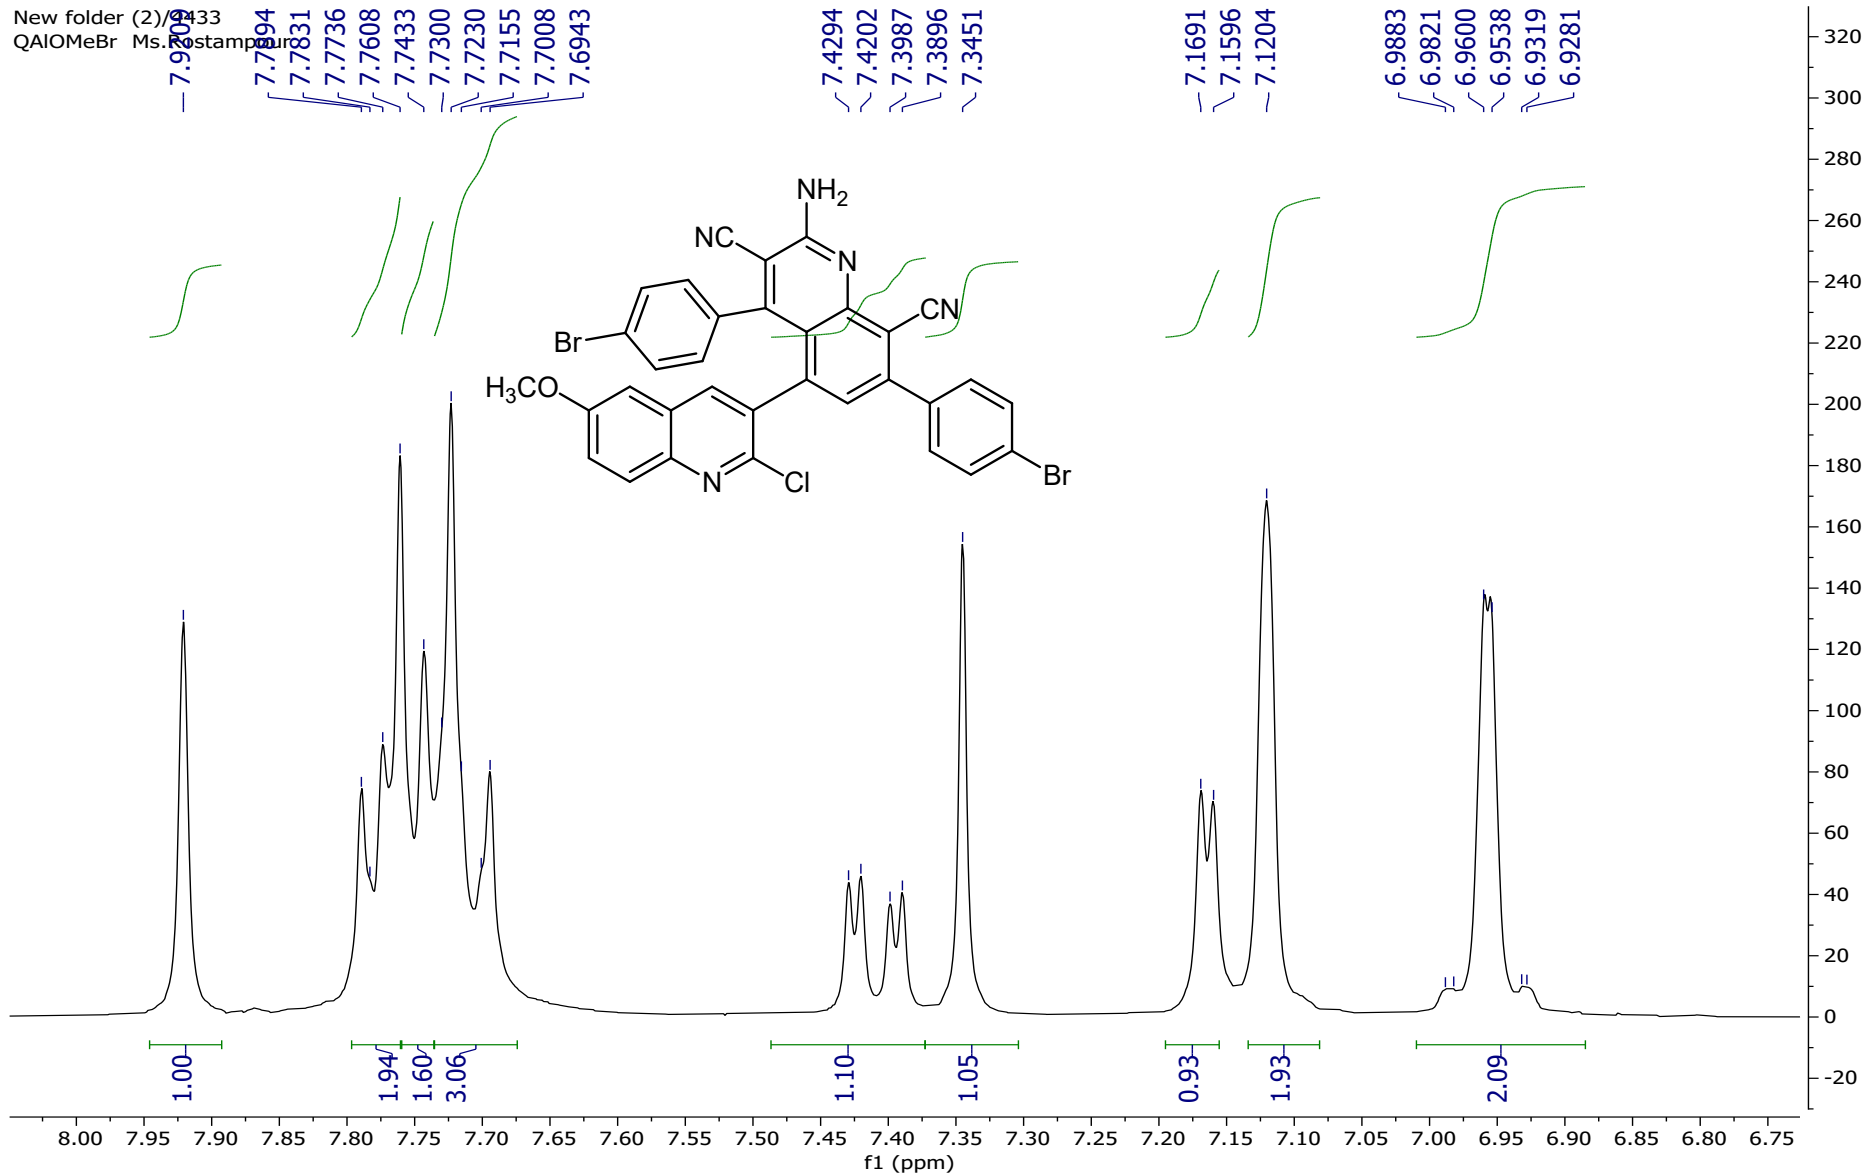

$^1\text{H}$  NMR Spectrum **3d**

New folder (2)/4434  
QAIOMeBr Ms.Rostampour

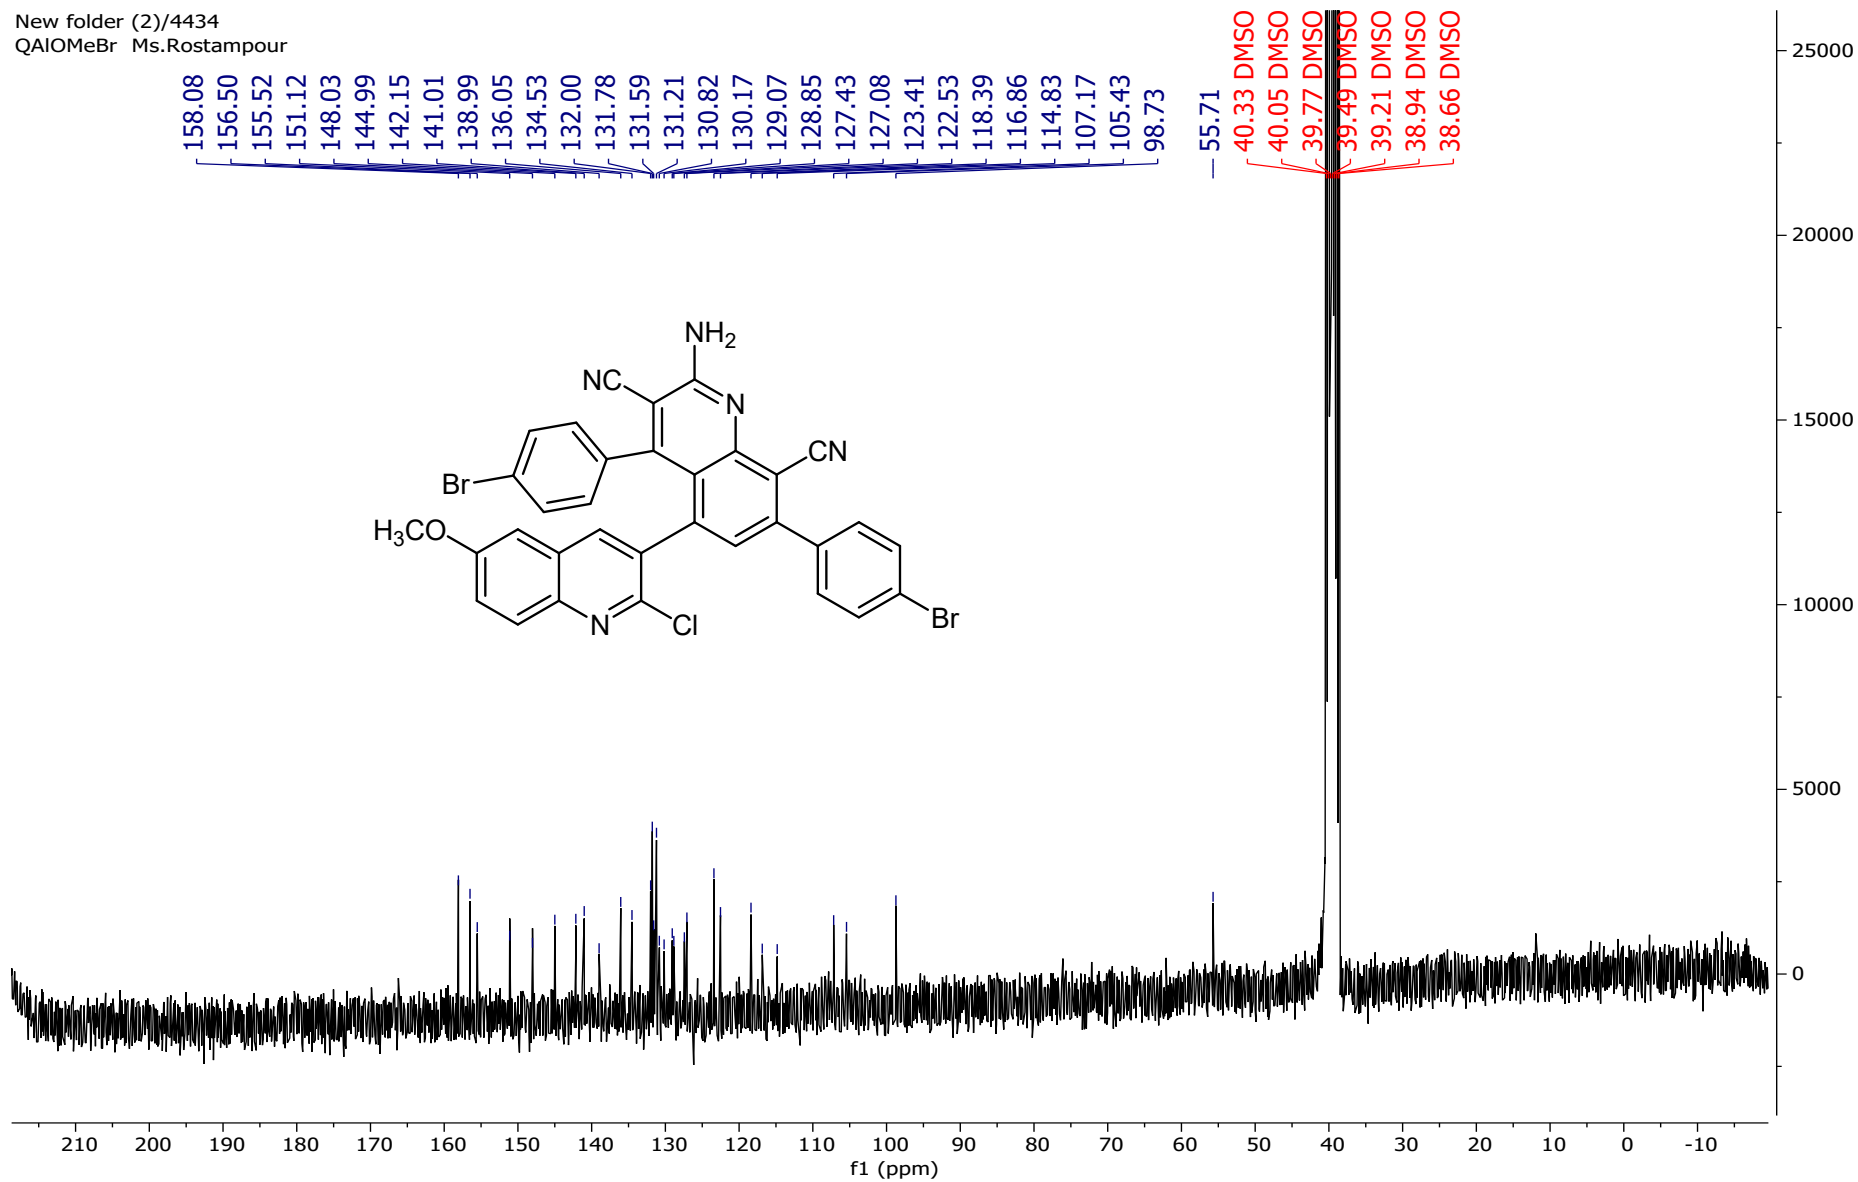

New folder (2)/443  
QAIOMeBr Ms.Rostambo

158.08  
156.50  
155.52

151.12

148.03

144.99

142.15

141.01

138.99

136.05

134.53

132.00

131.78

131.59

131.21

130.82

130.17

129.07

128.85

127.43

127.08

123.41

122.53

118.39

116.86

114.83

107.17

105.43

98.73

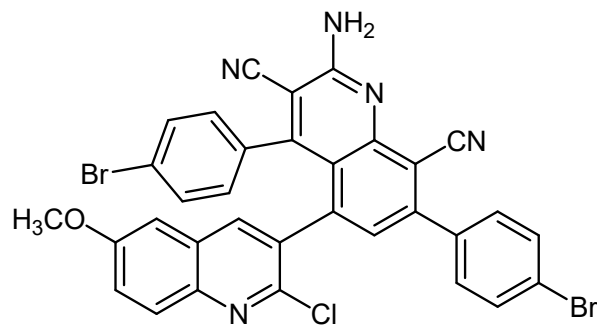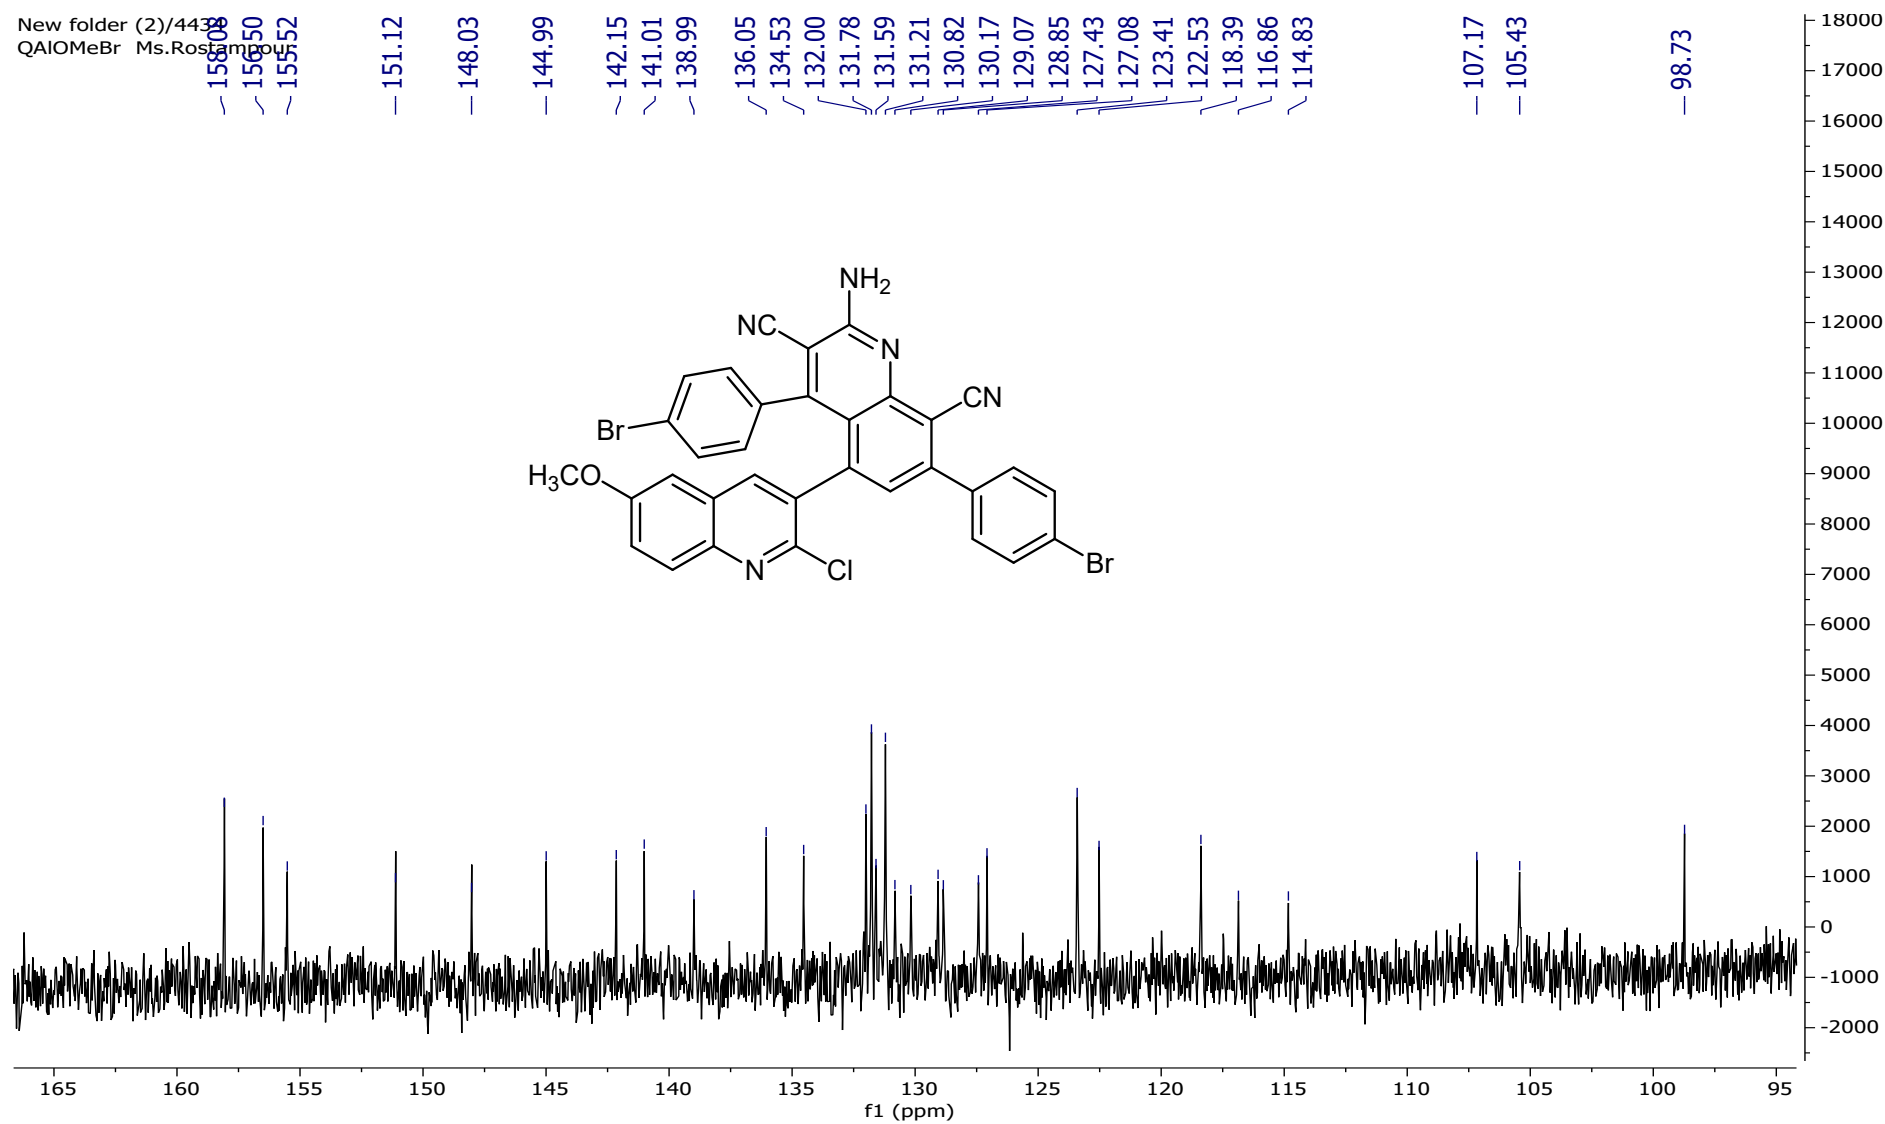

<sup>13</sup>C NMR Spectrum **3d**

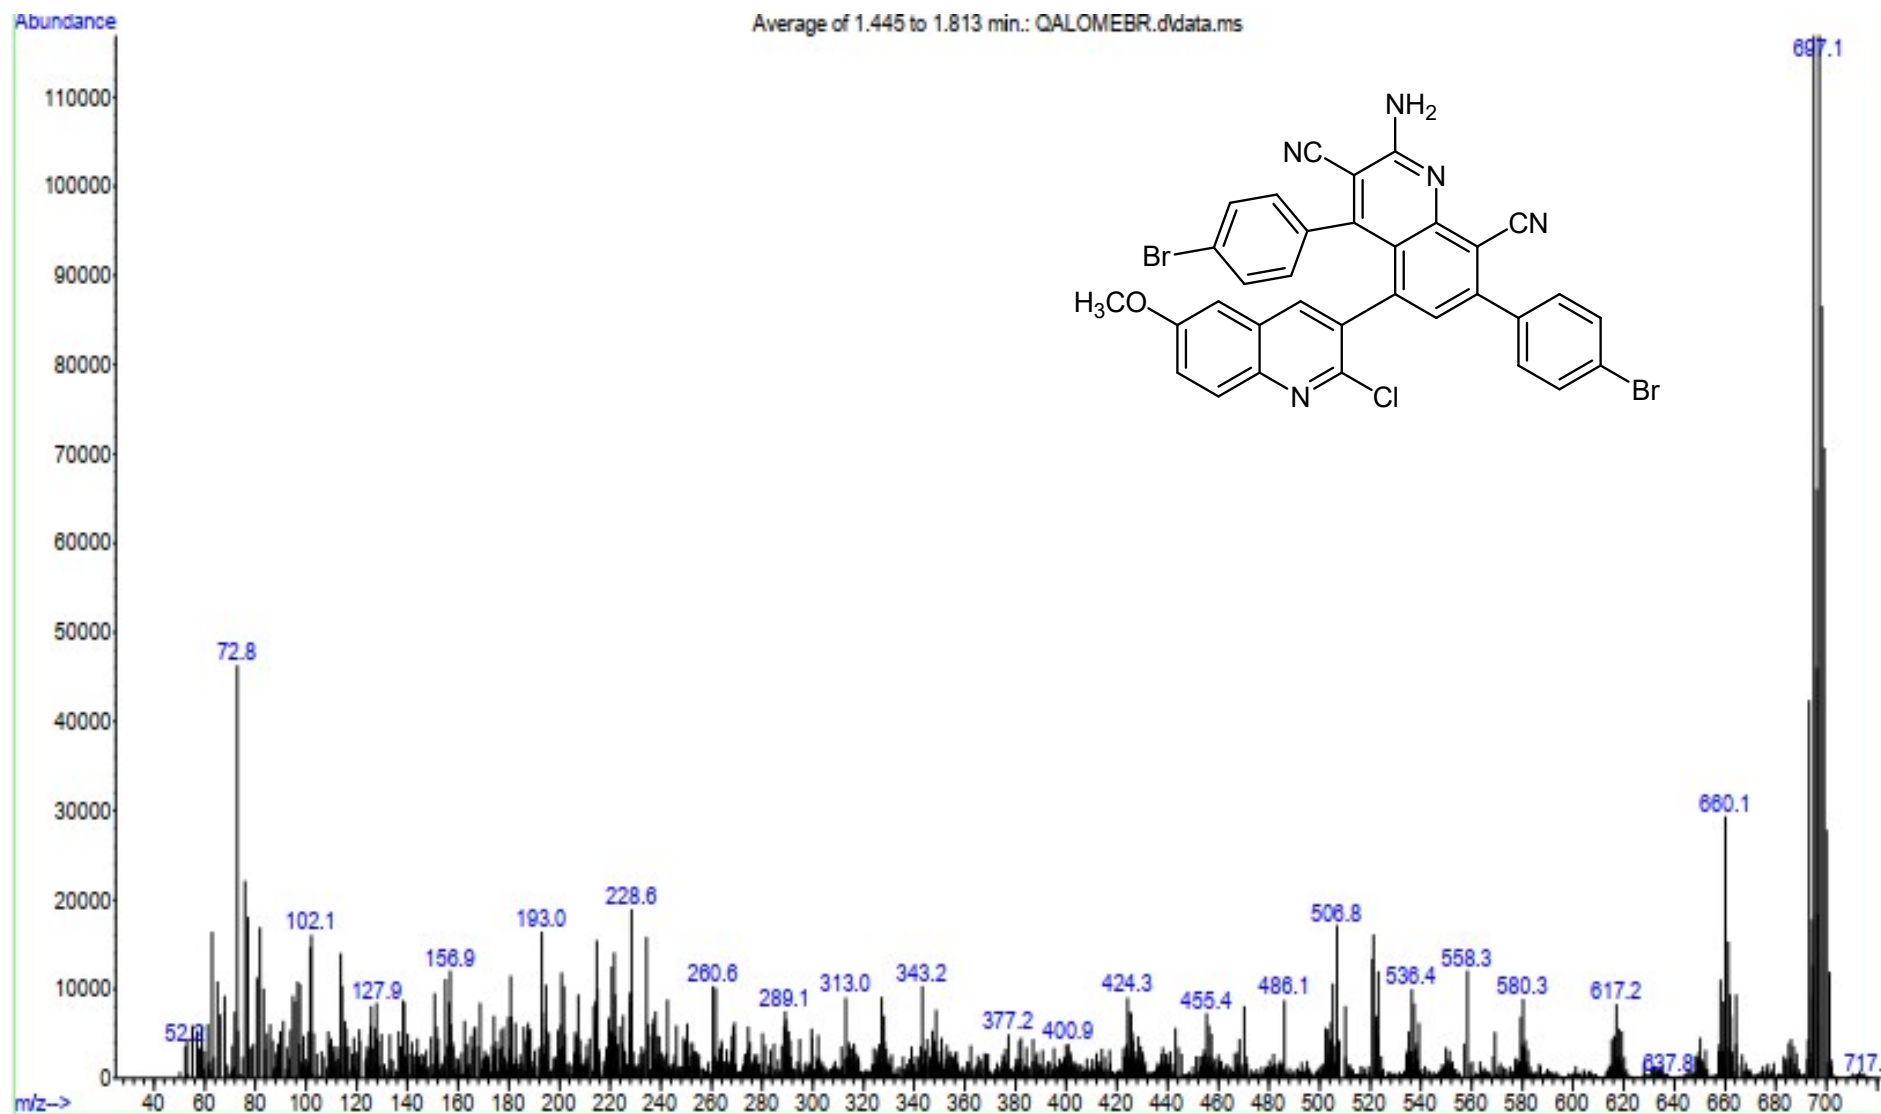

Mass Spectrum of **3d**



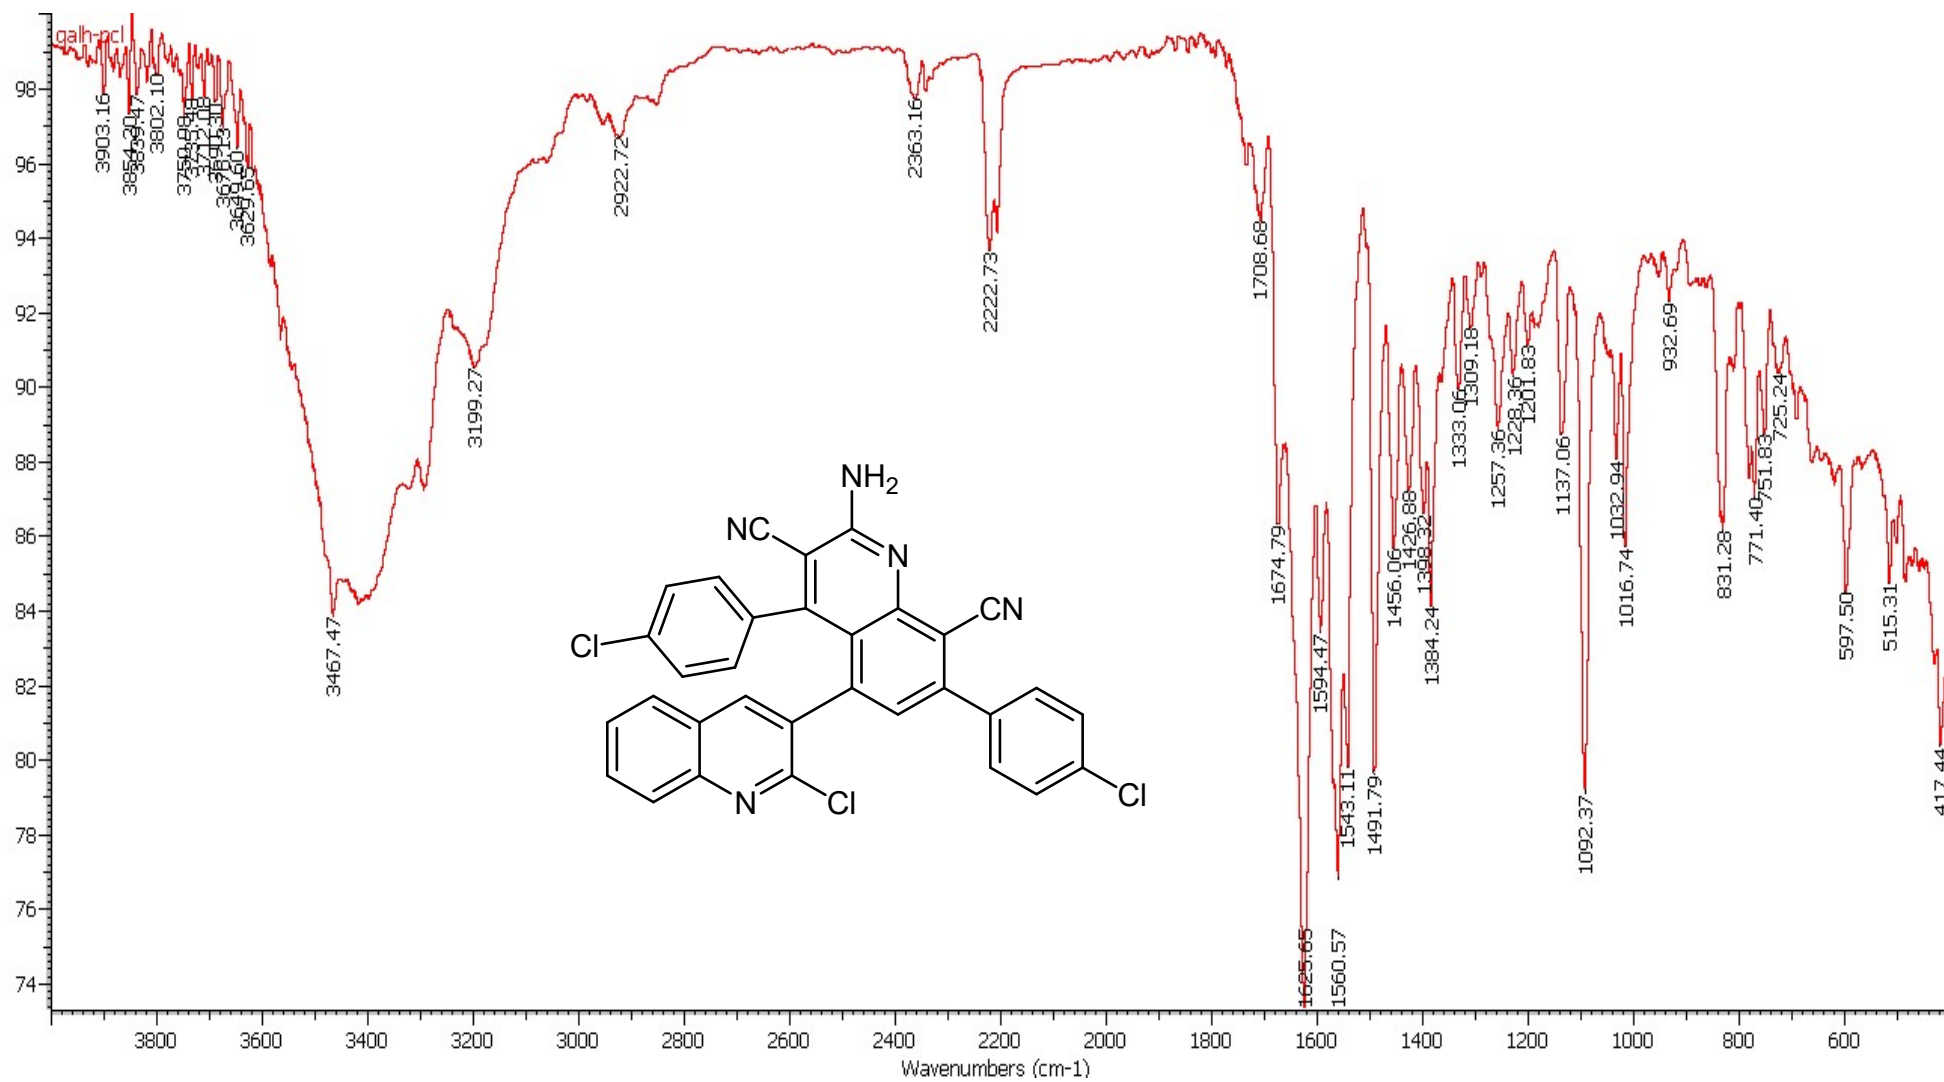

IR Spectrum of 3e

Desktop/4419  
QA14Cl Ms.Rostampour

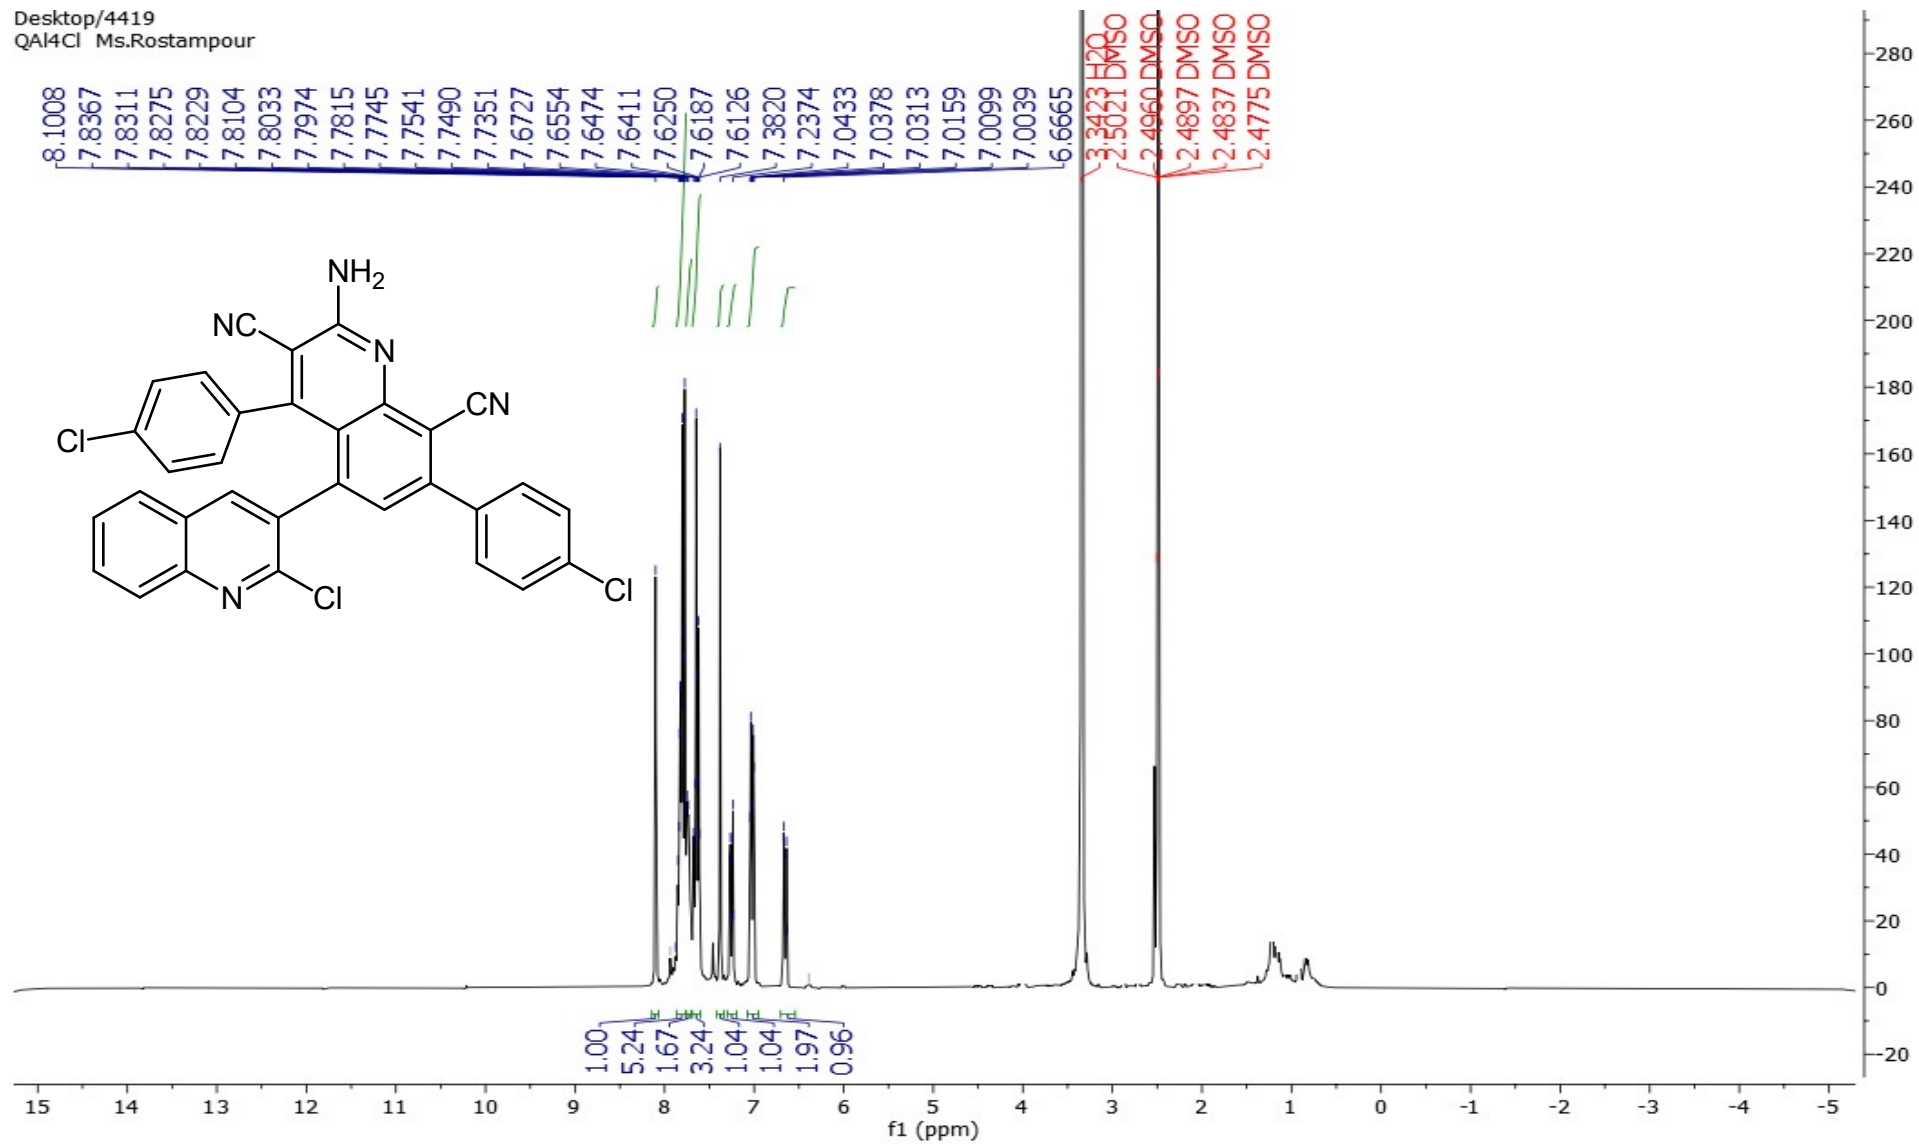

$^1\text{H}$  NMR Spectrum 3e

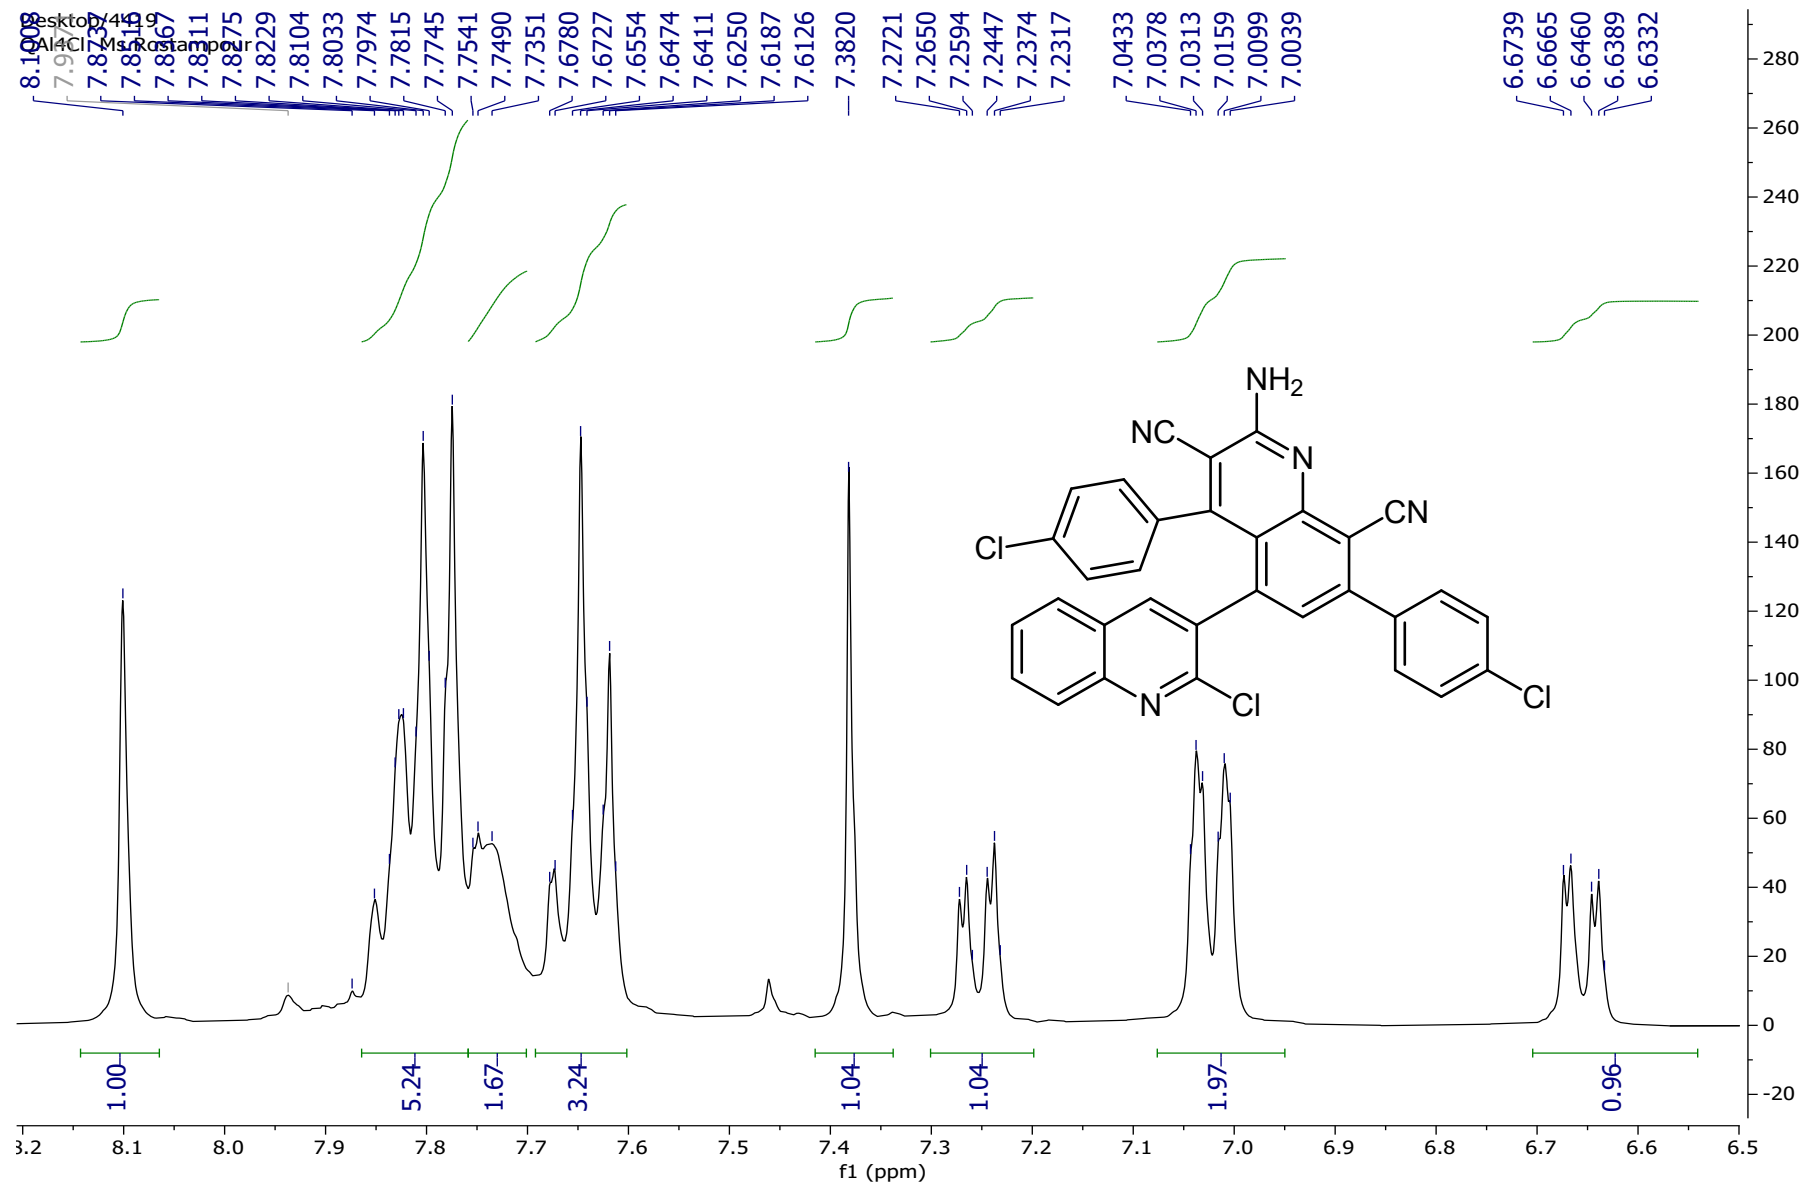

<sup>1</sup>H NMR Spectrum **3e**

Desktop/4282  
qAf-4-Cl Ms.Rostampour

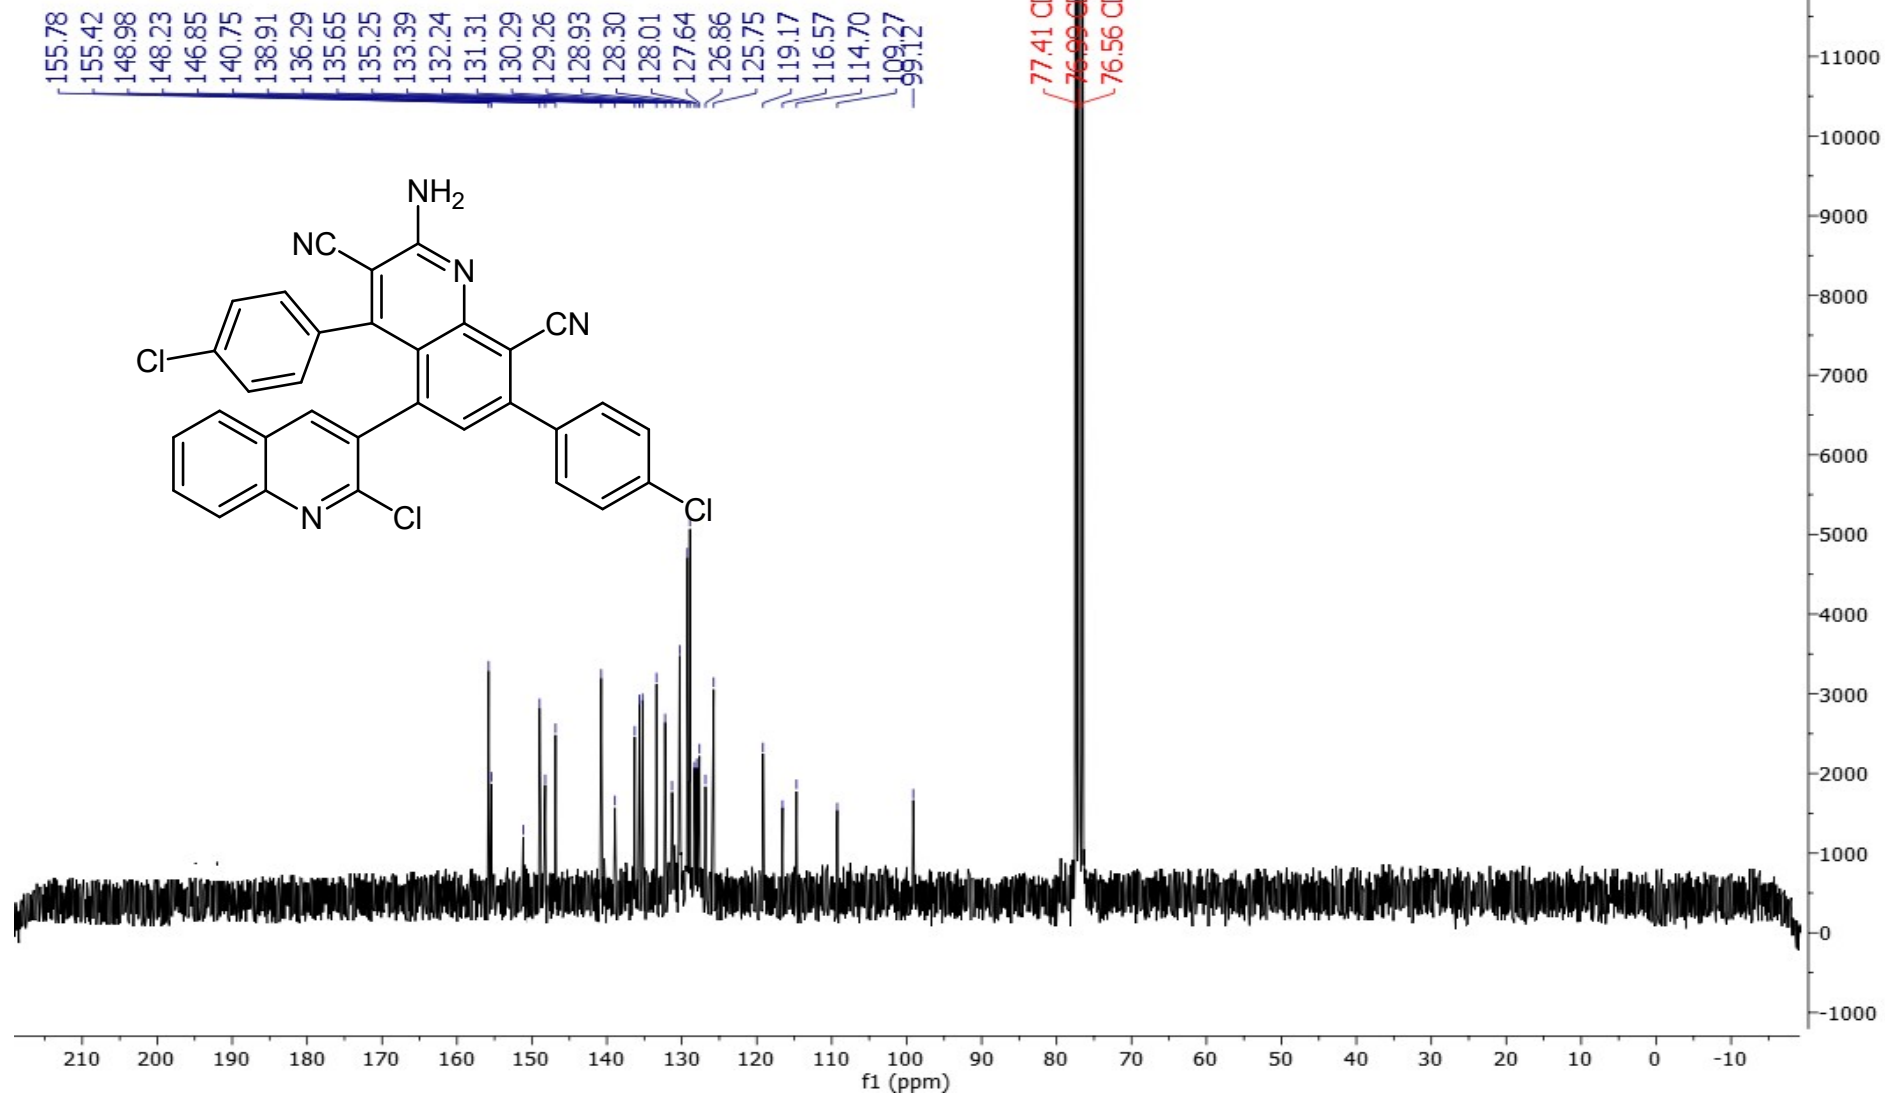

$^{13}\text{C}$  NMR Spectrum **3e**

Desktop/4282  
qAf-4-Cl Ms.Rostampour

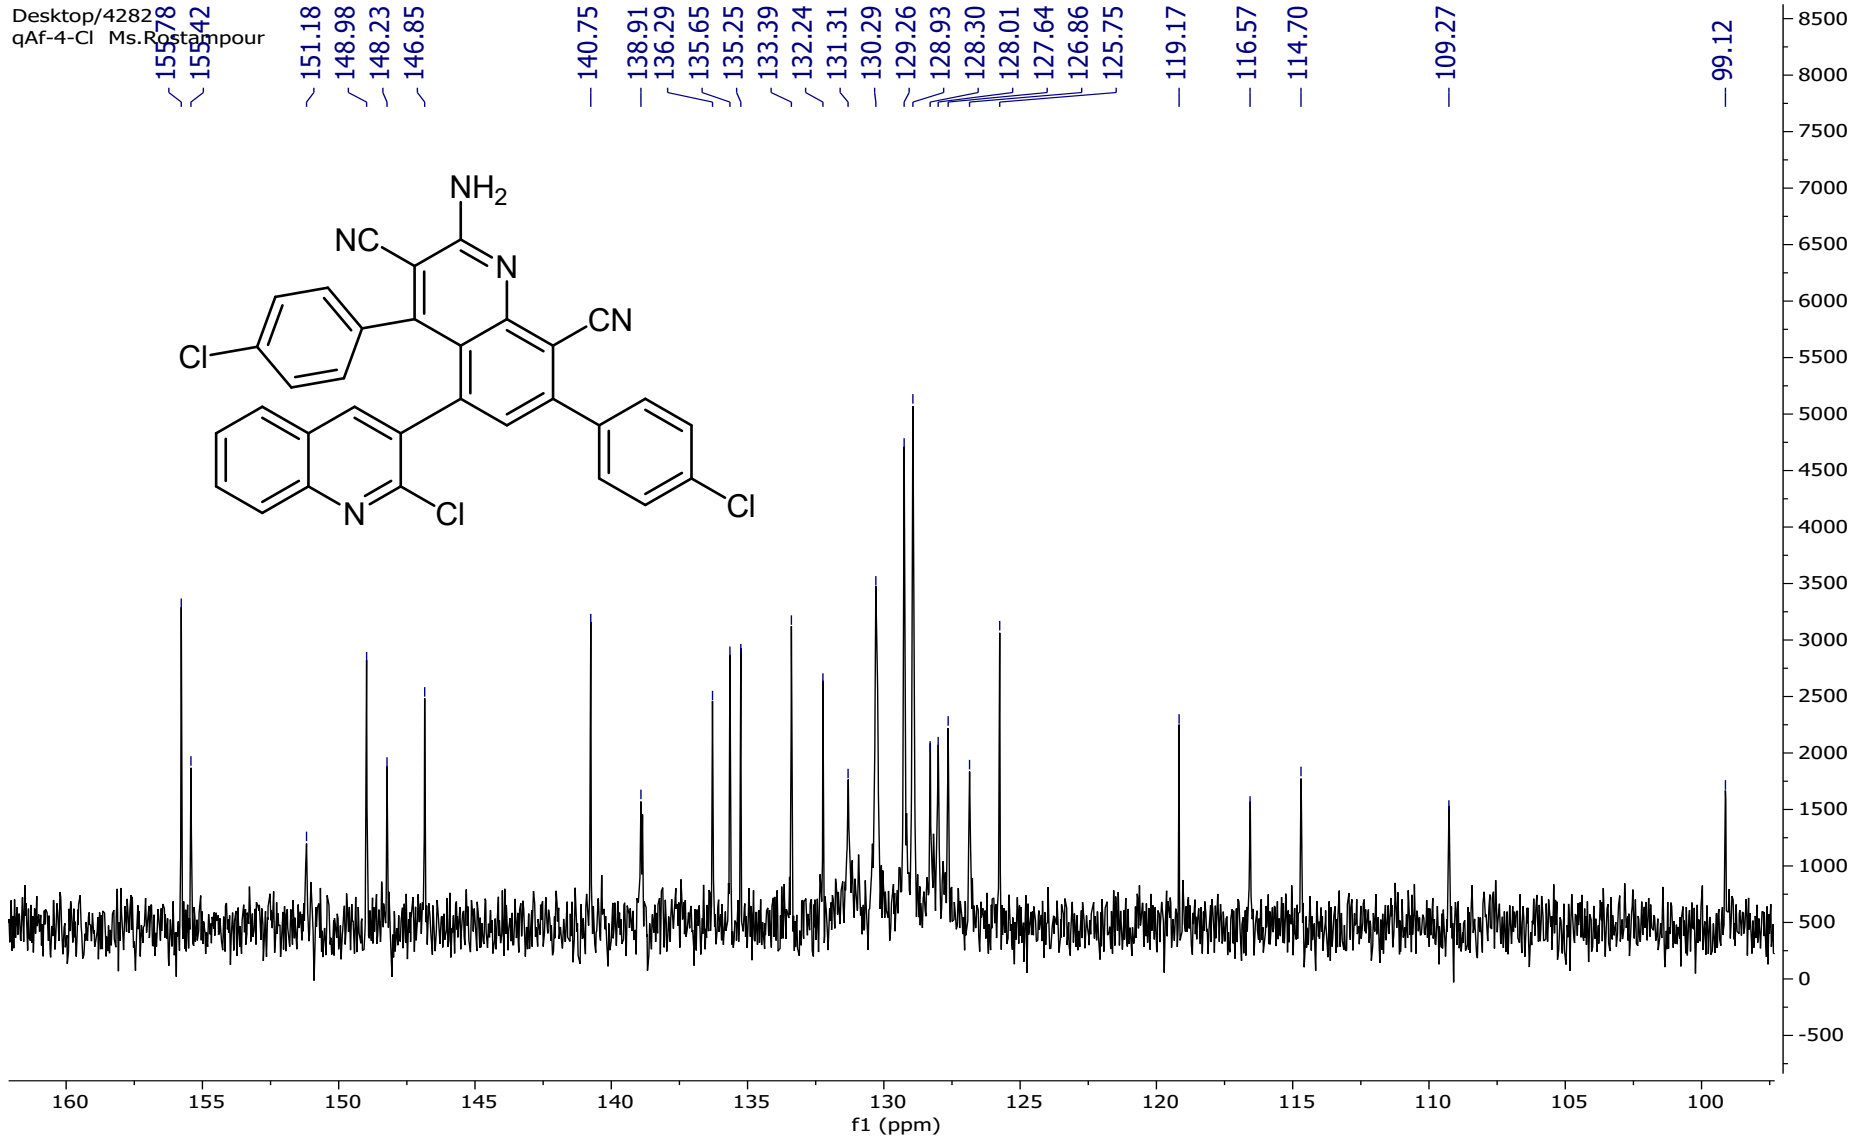

<sup>13</sup>C NMR Spectrum 3e

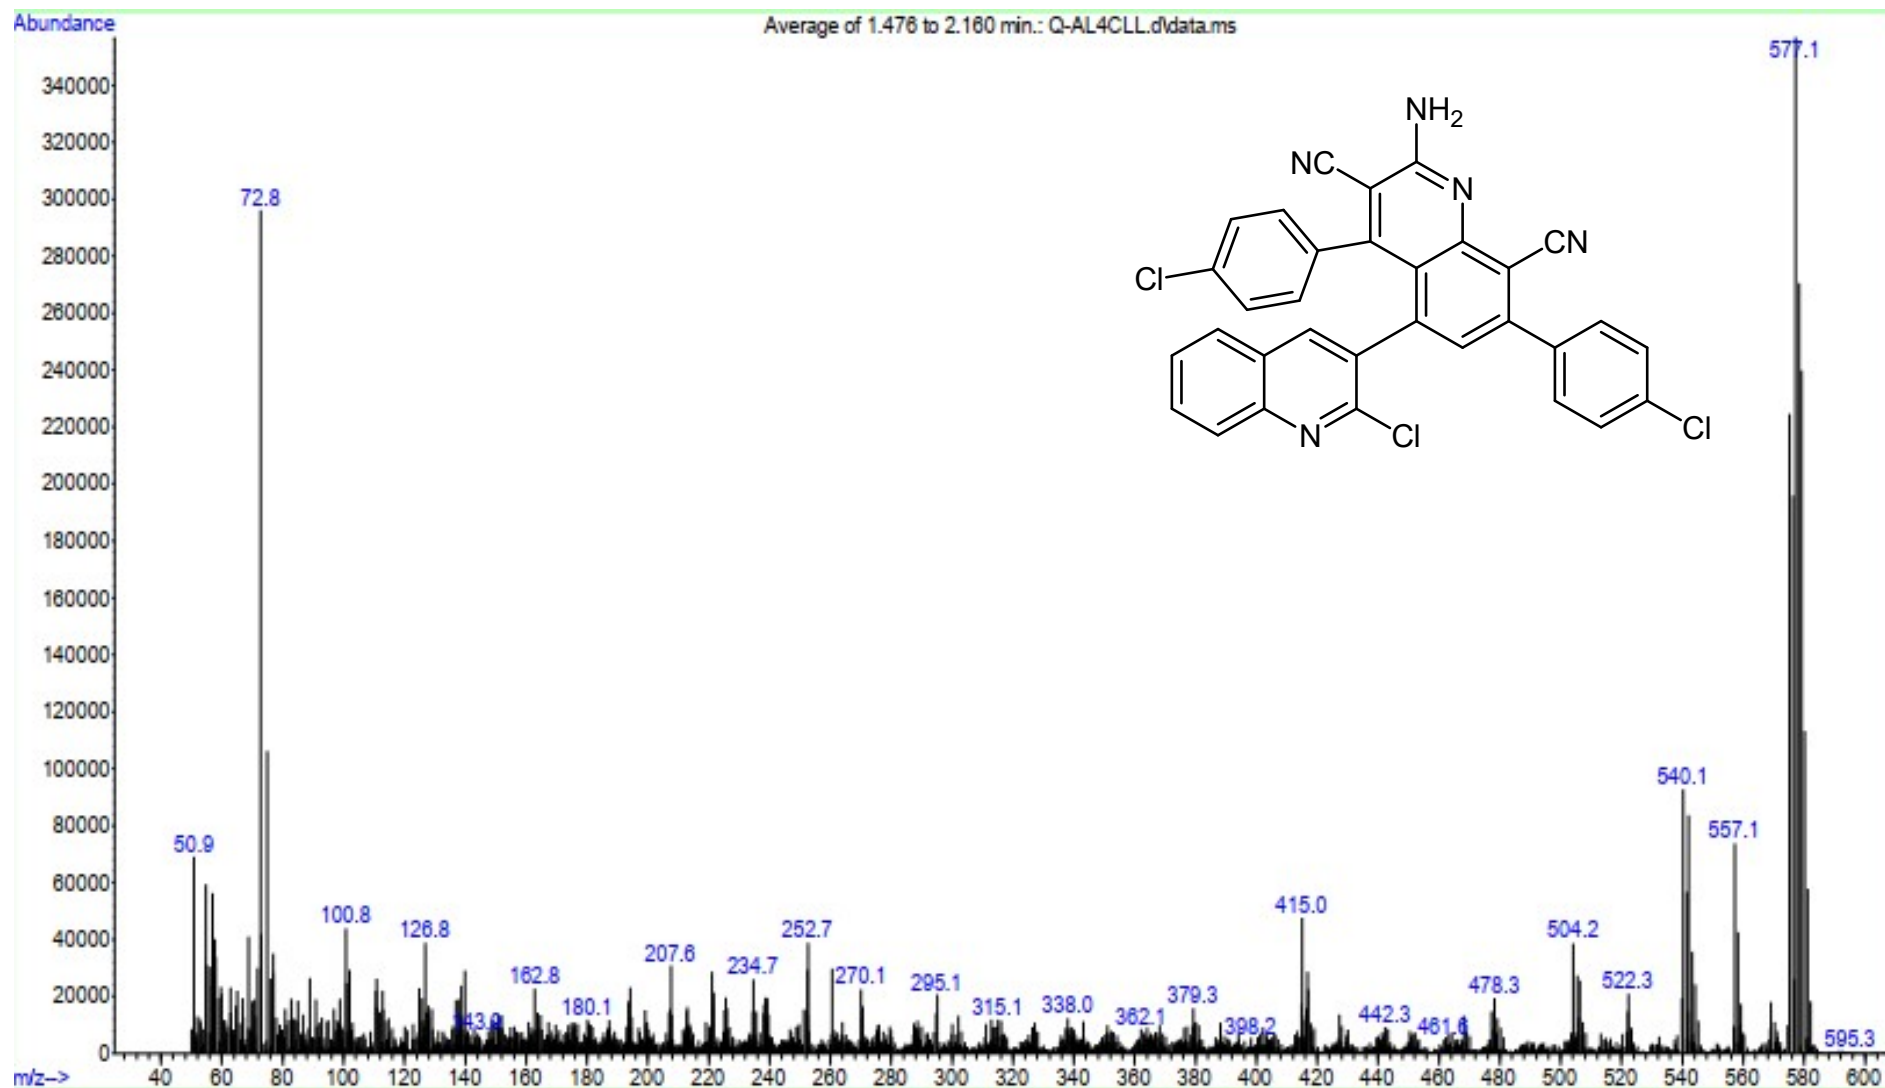

Mass Spectrum of 3e

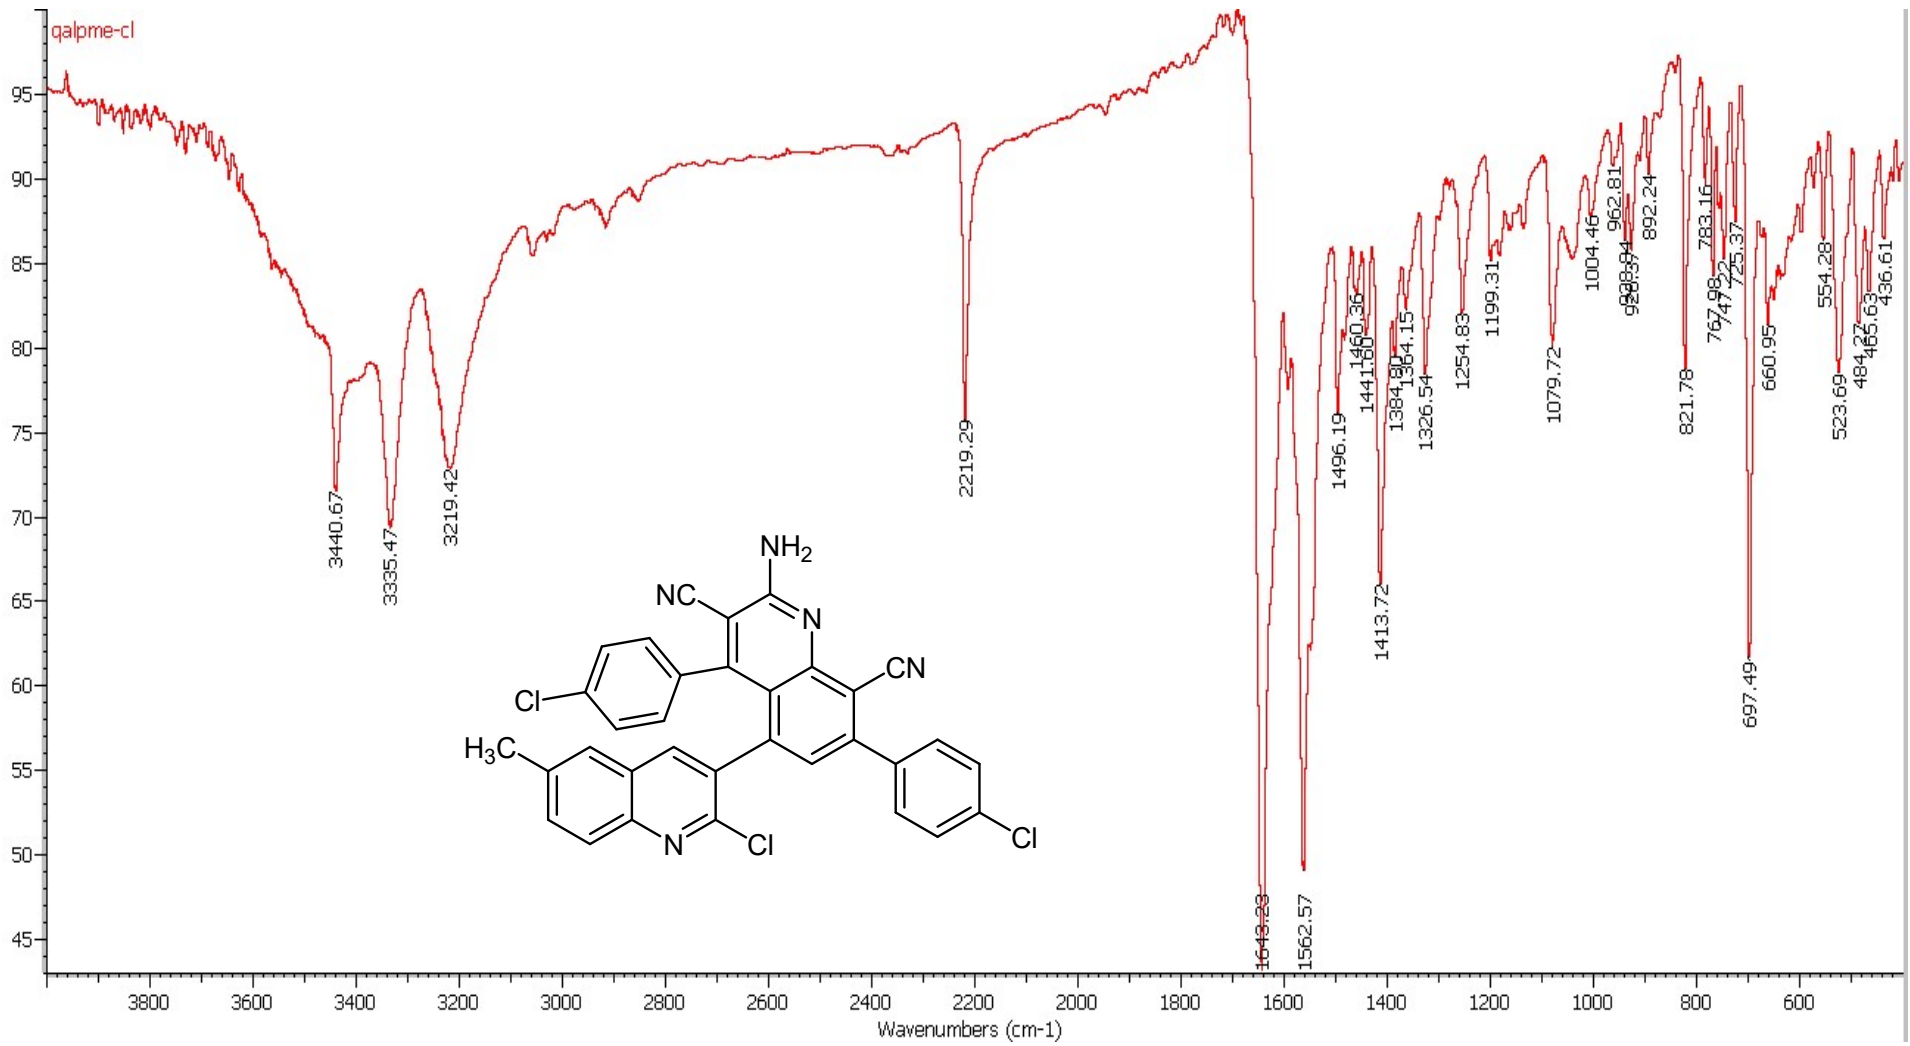

IR Spectrum 3f

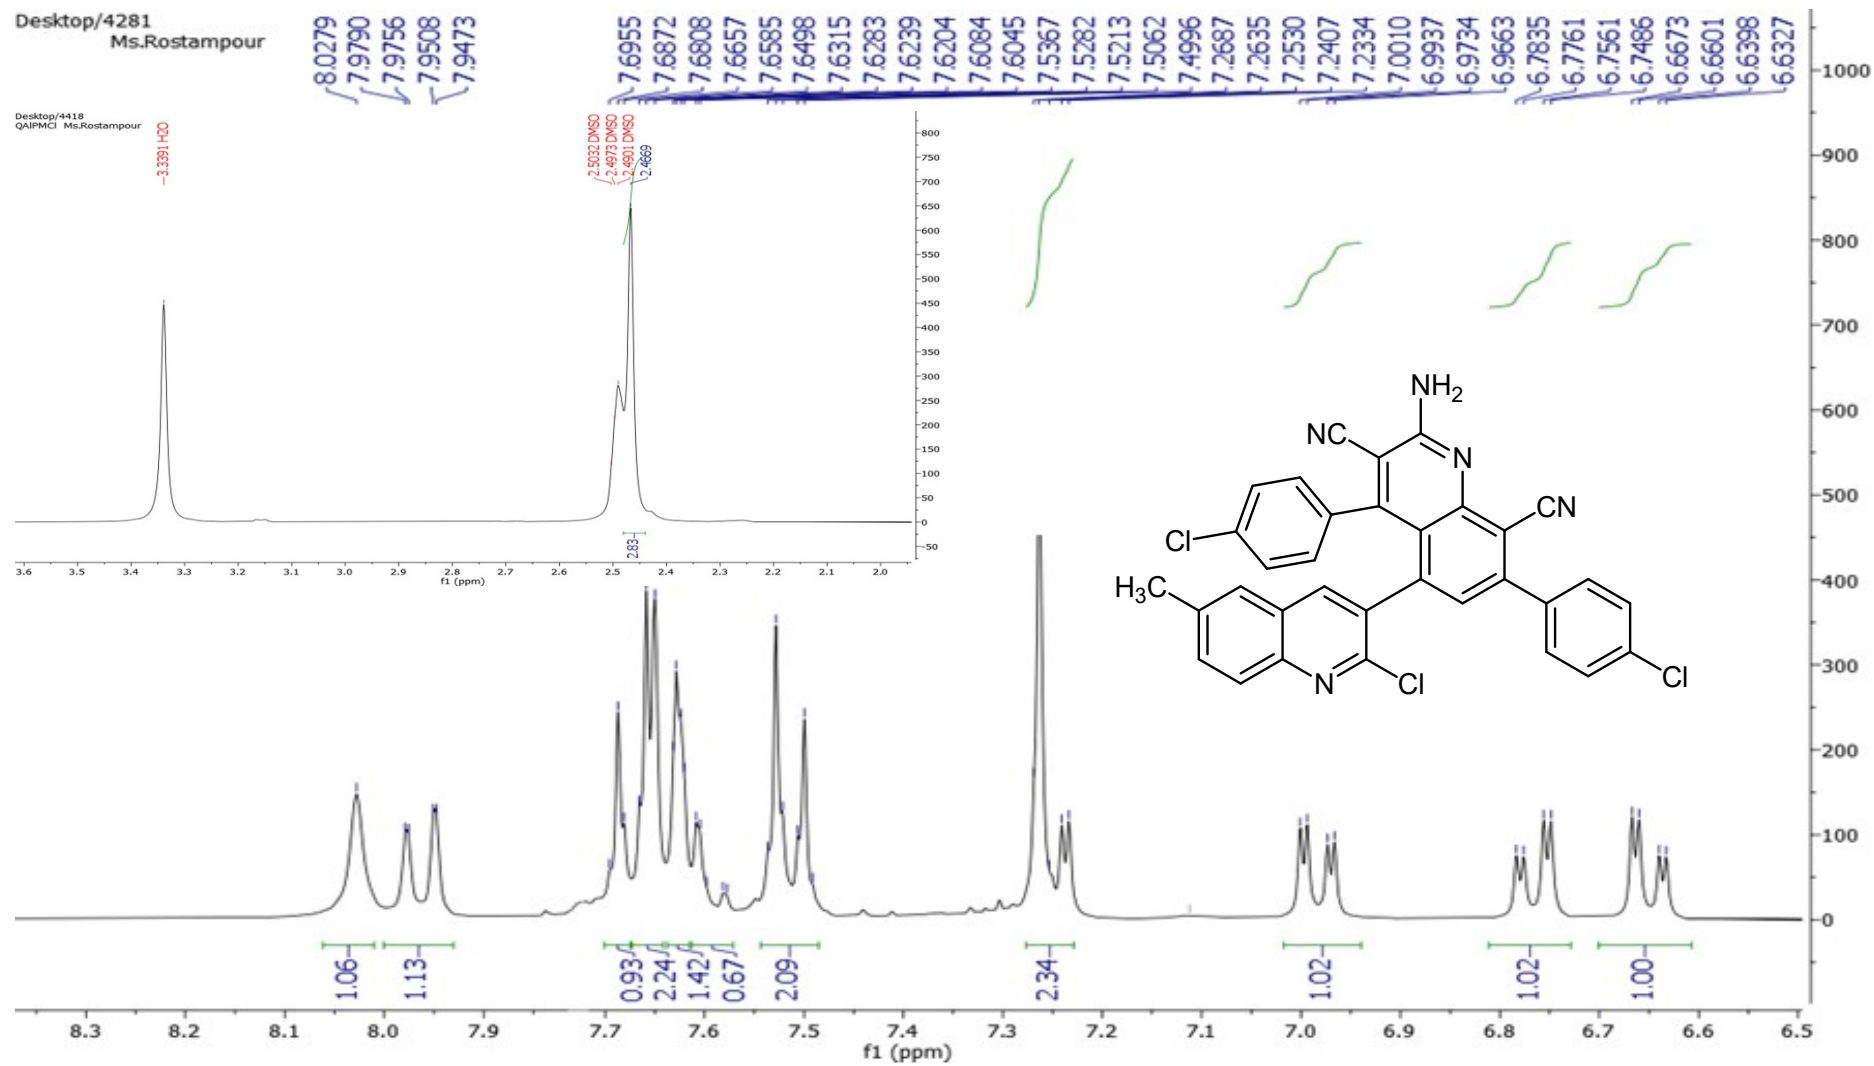

<sup>1</sup>H NMR Spectrum **3f**



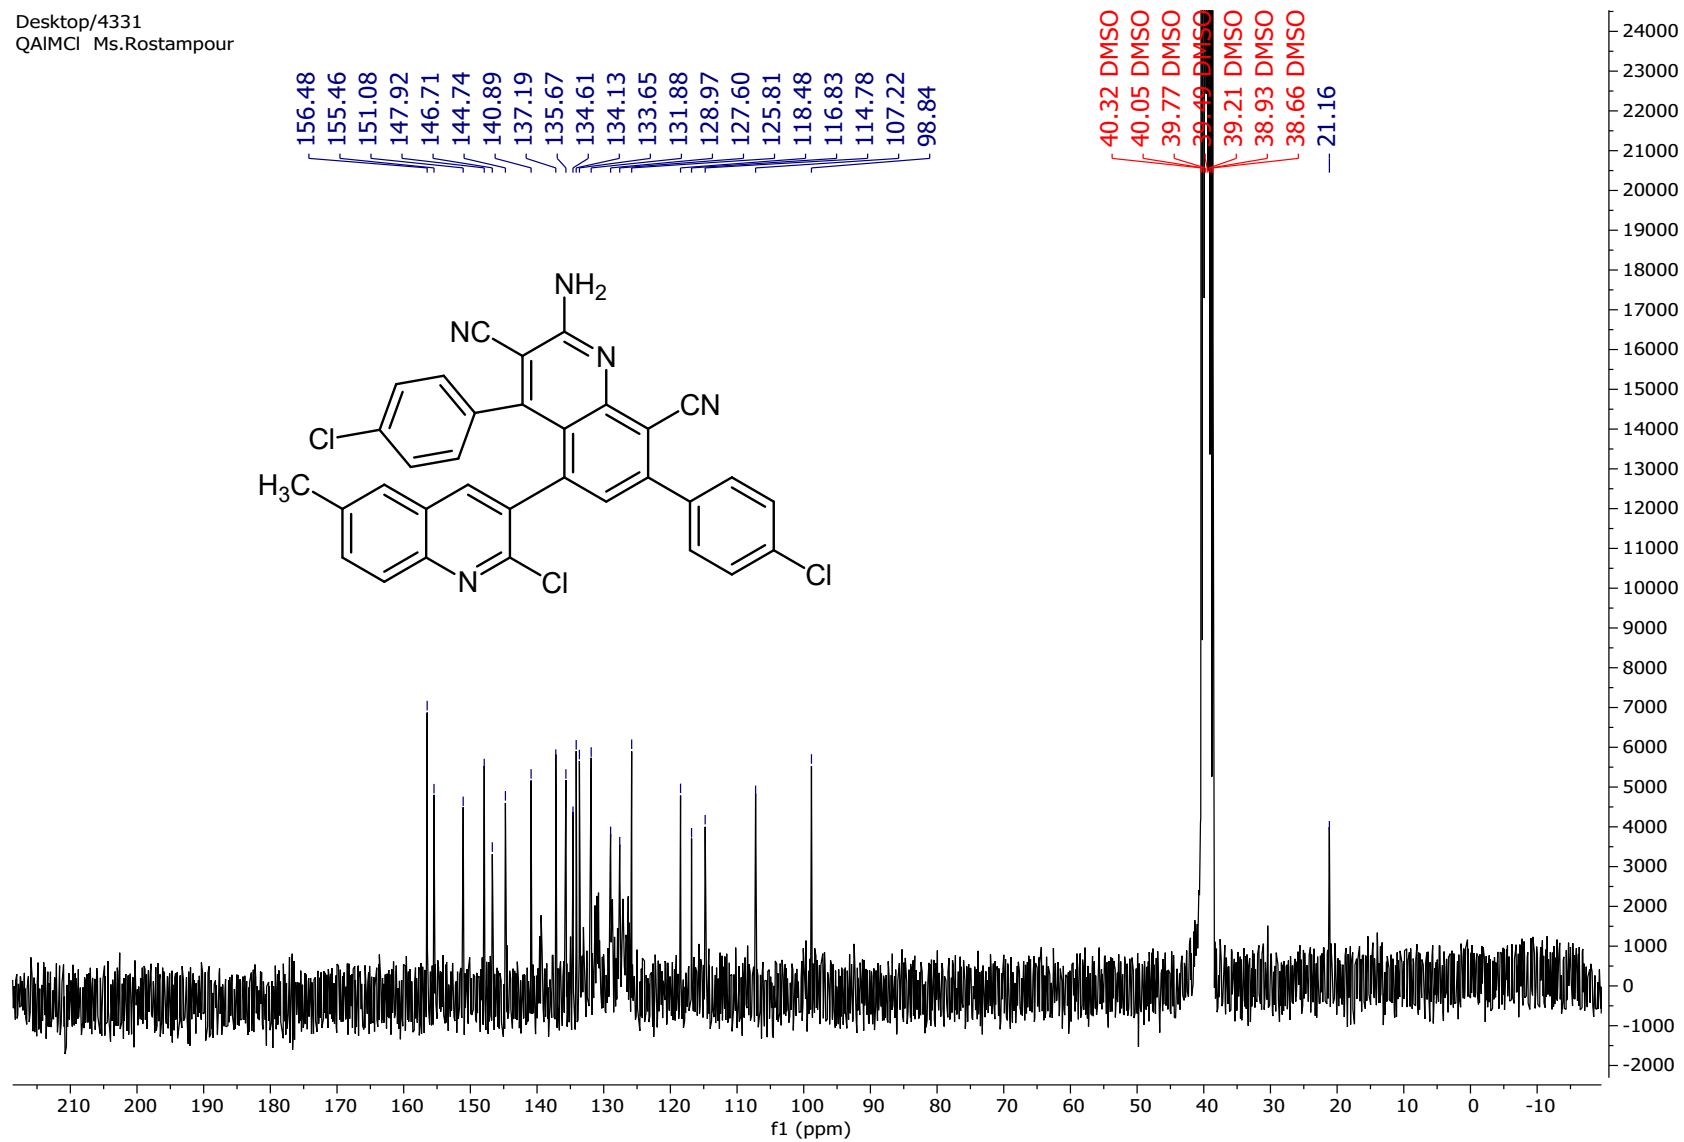

<sup>13</sup>C NMR Spectrum **3f**

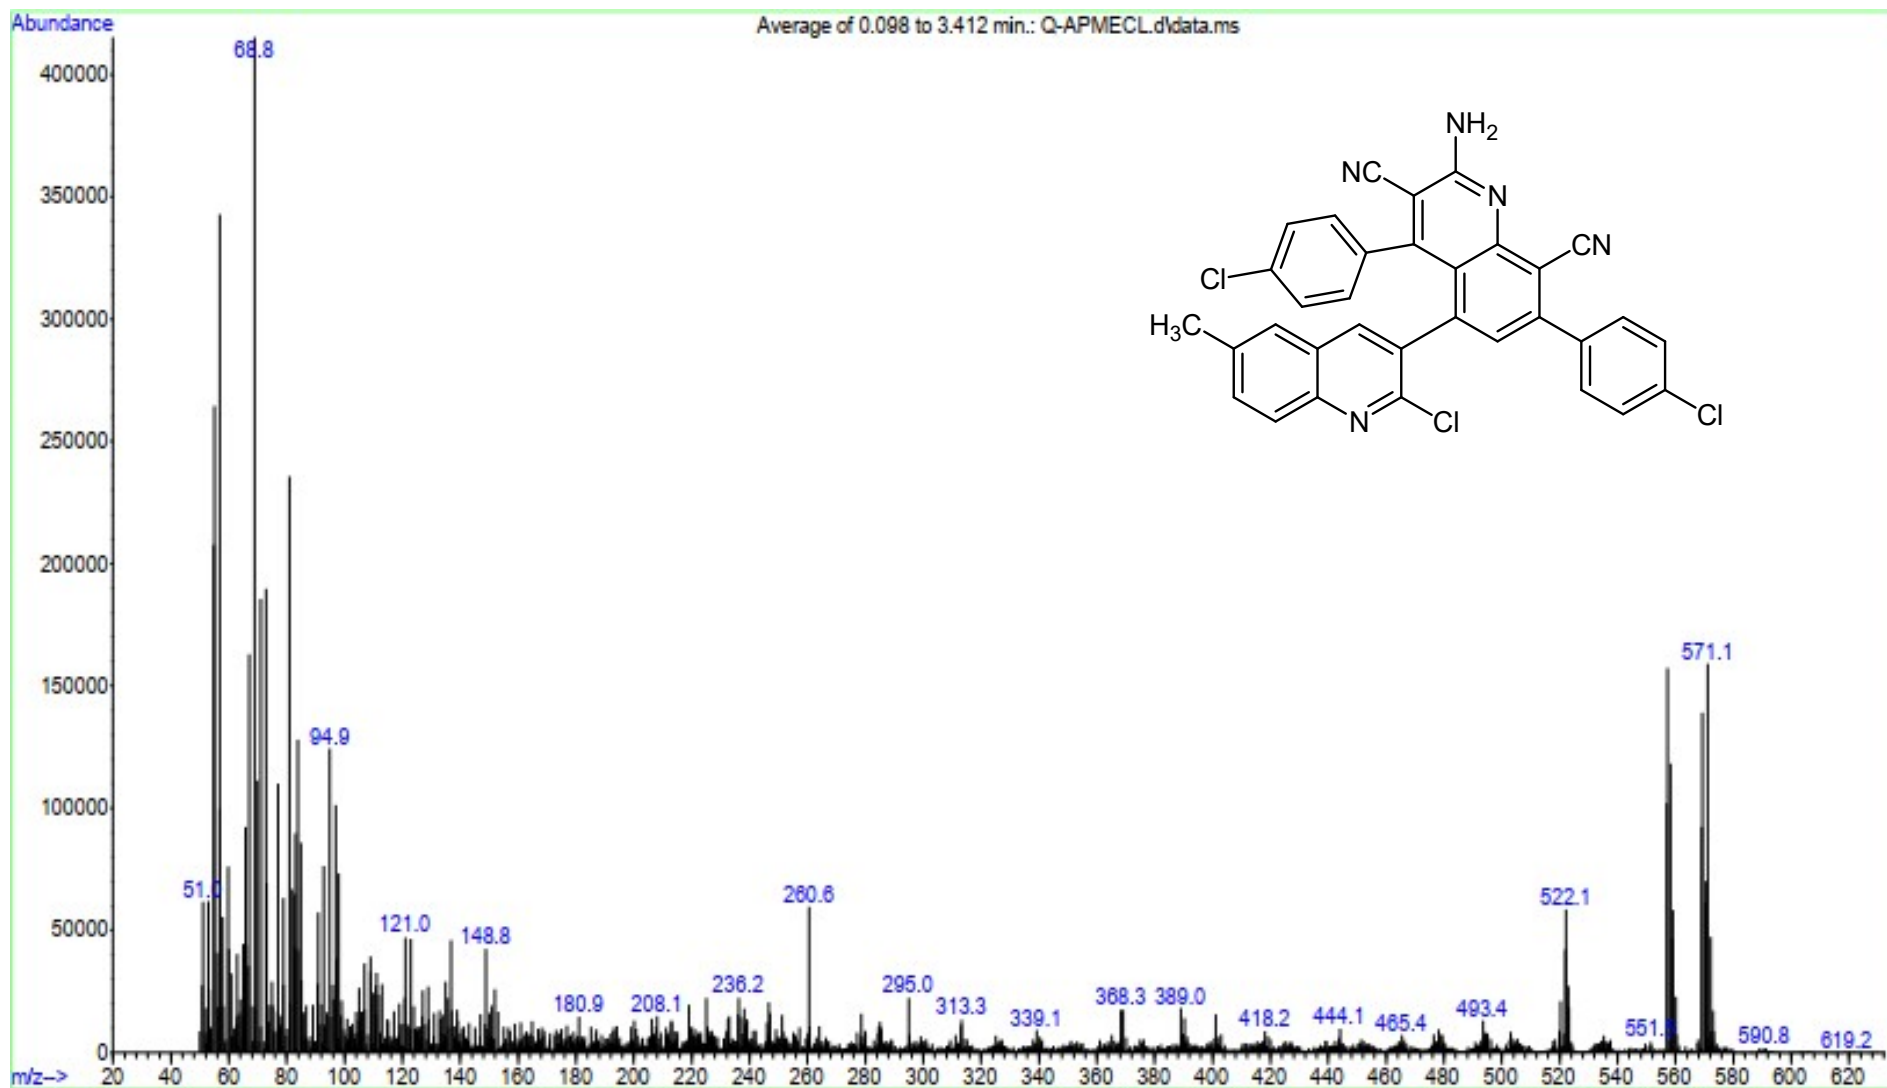

Mass Spectrum **3f**

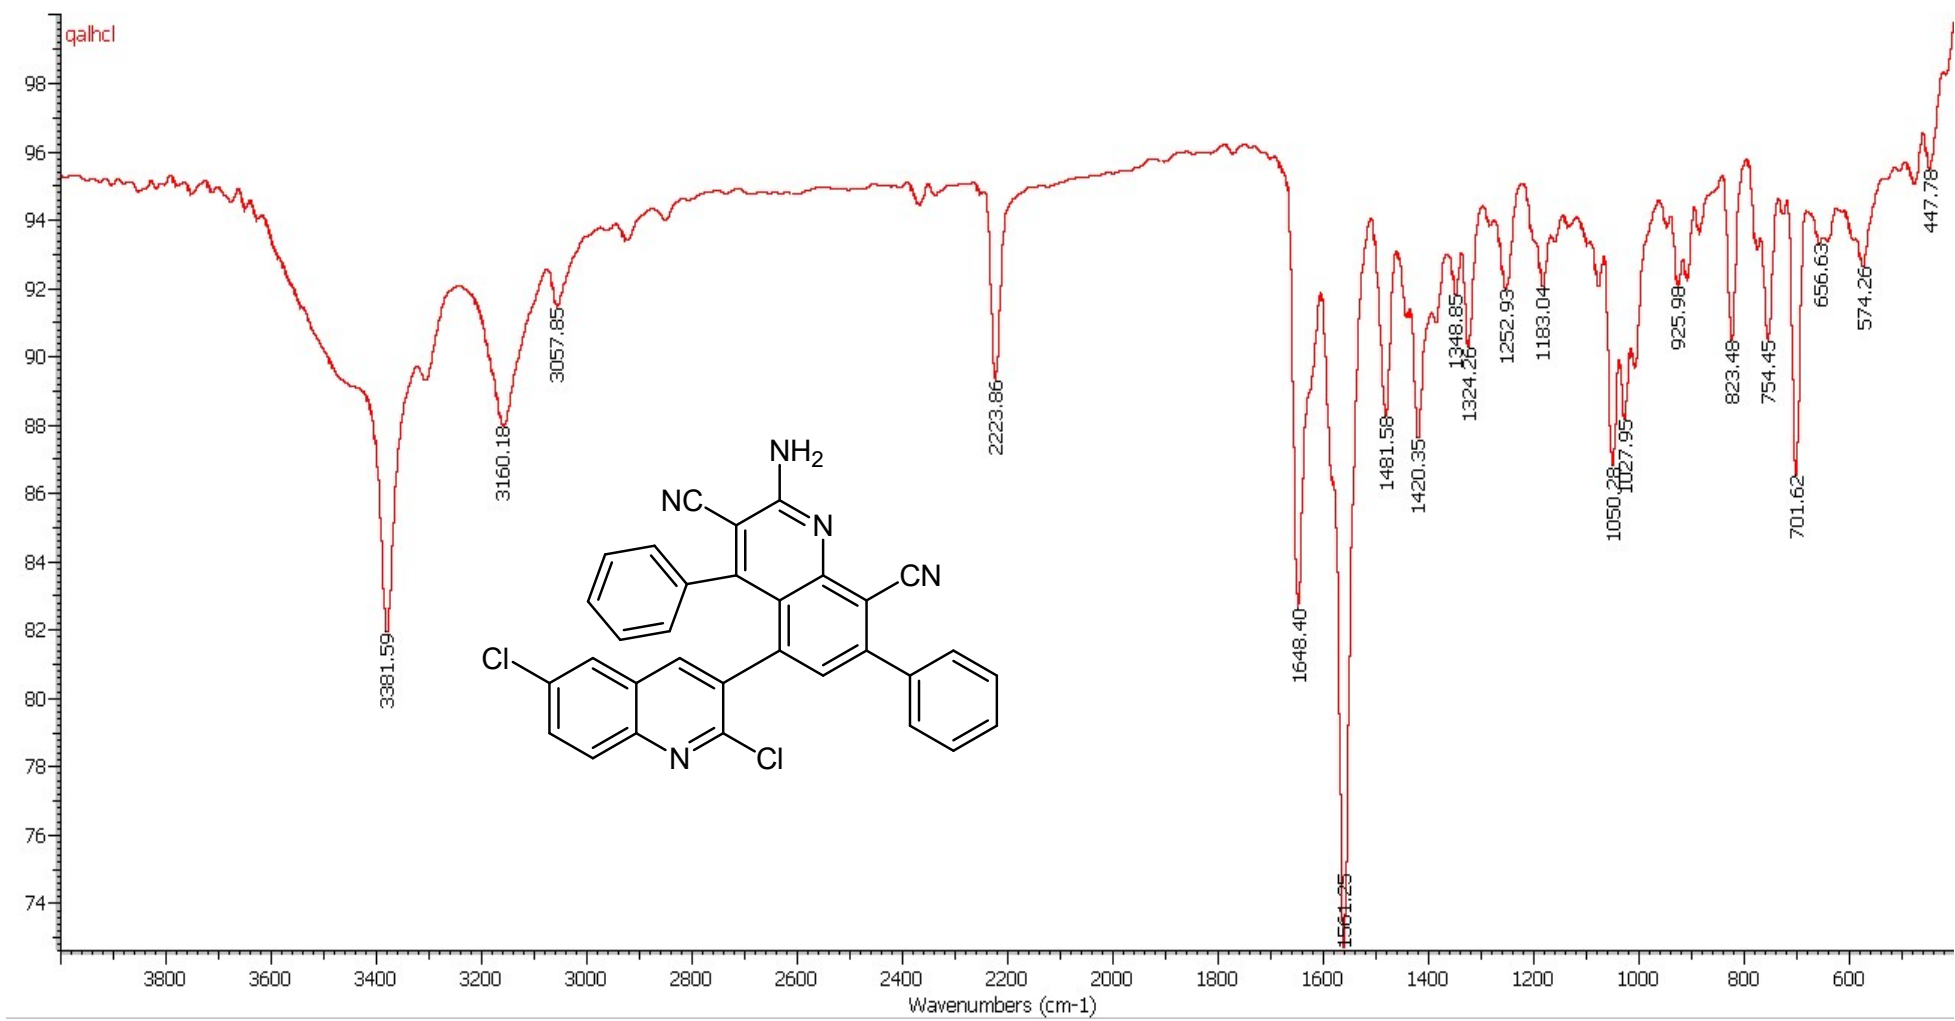

IR Spectrum 3g

Desktop/4380  
QAIHCl Ms.Rostampour

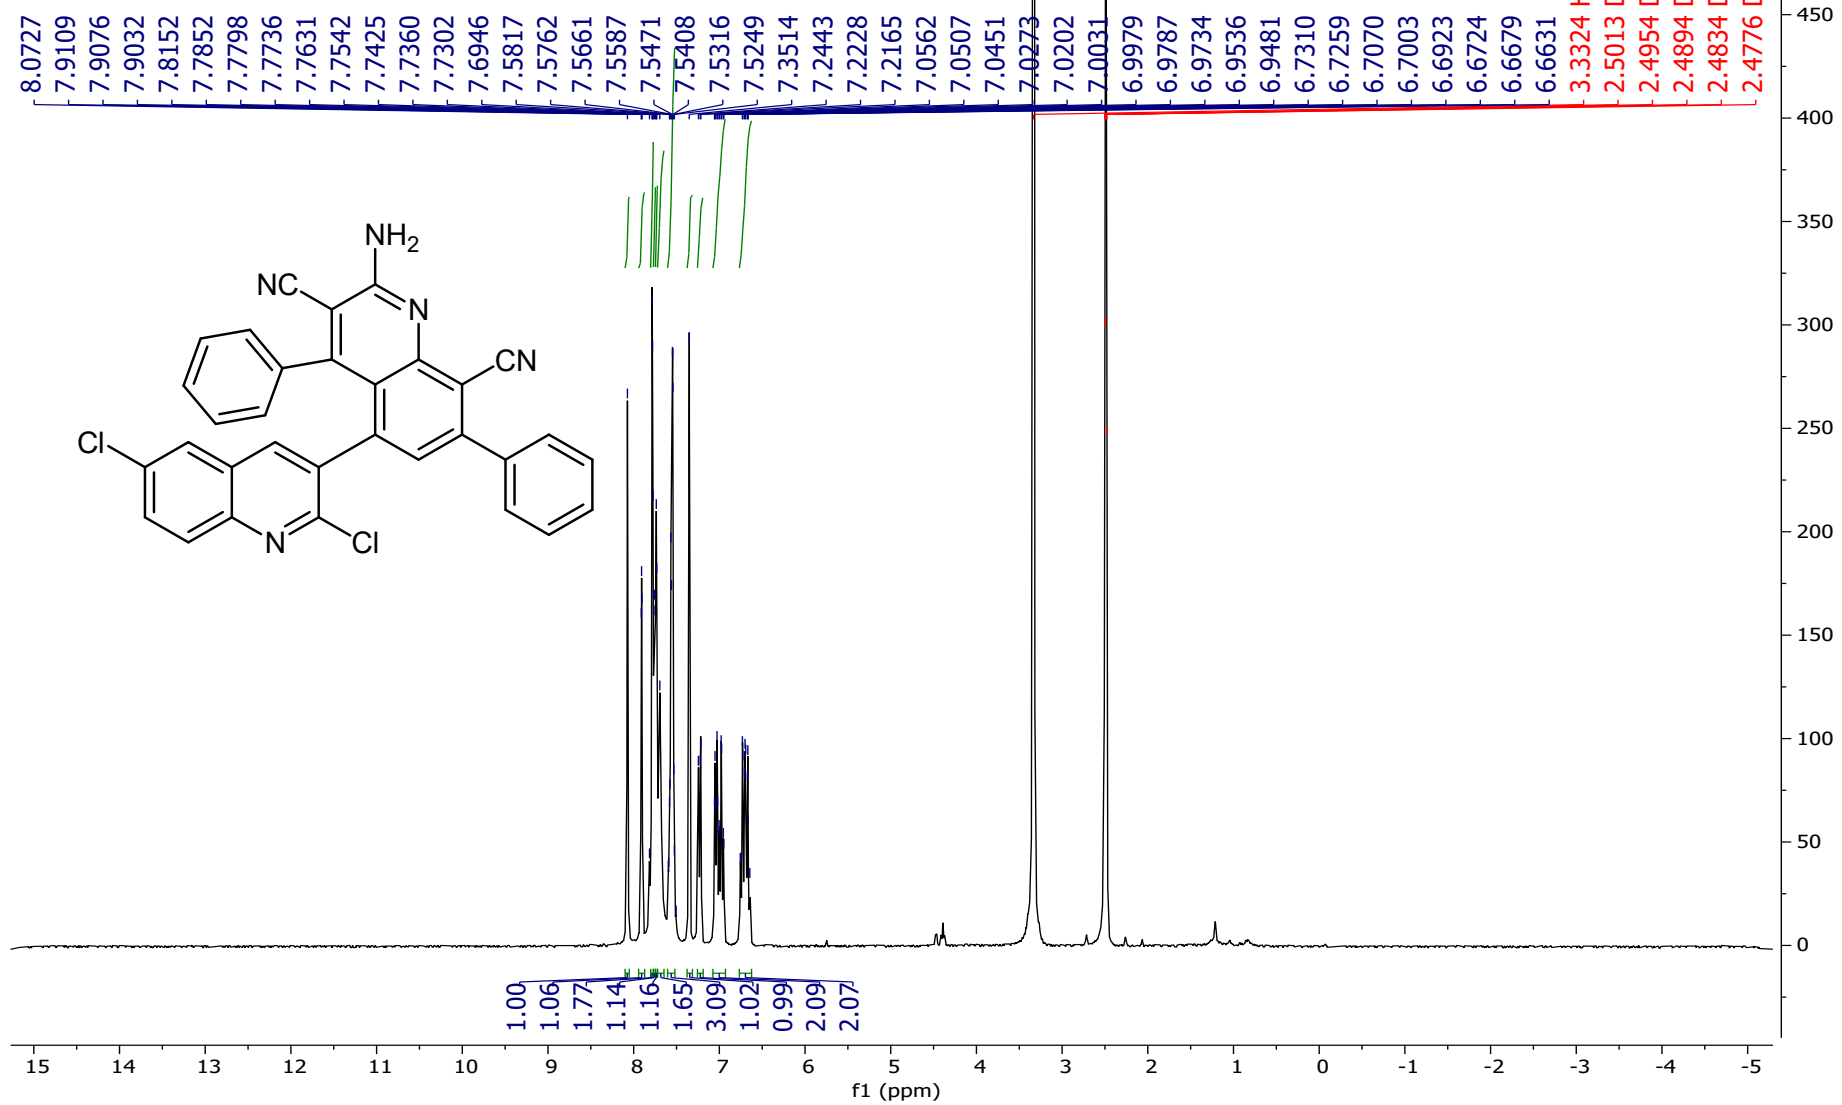

<sup>1</sup>H NMR Spectrum 3g

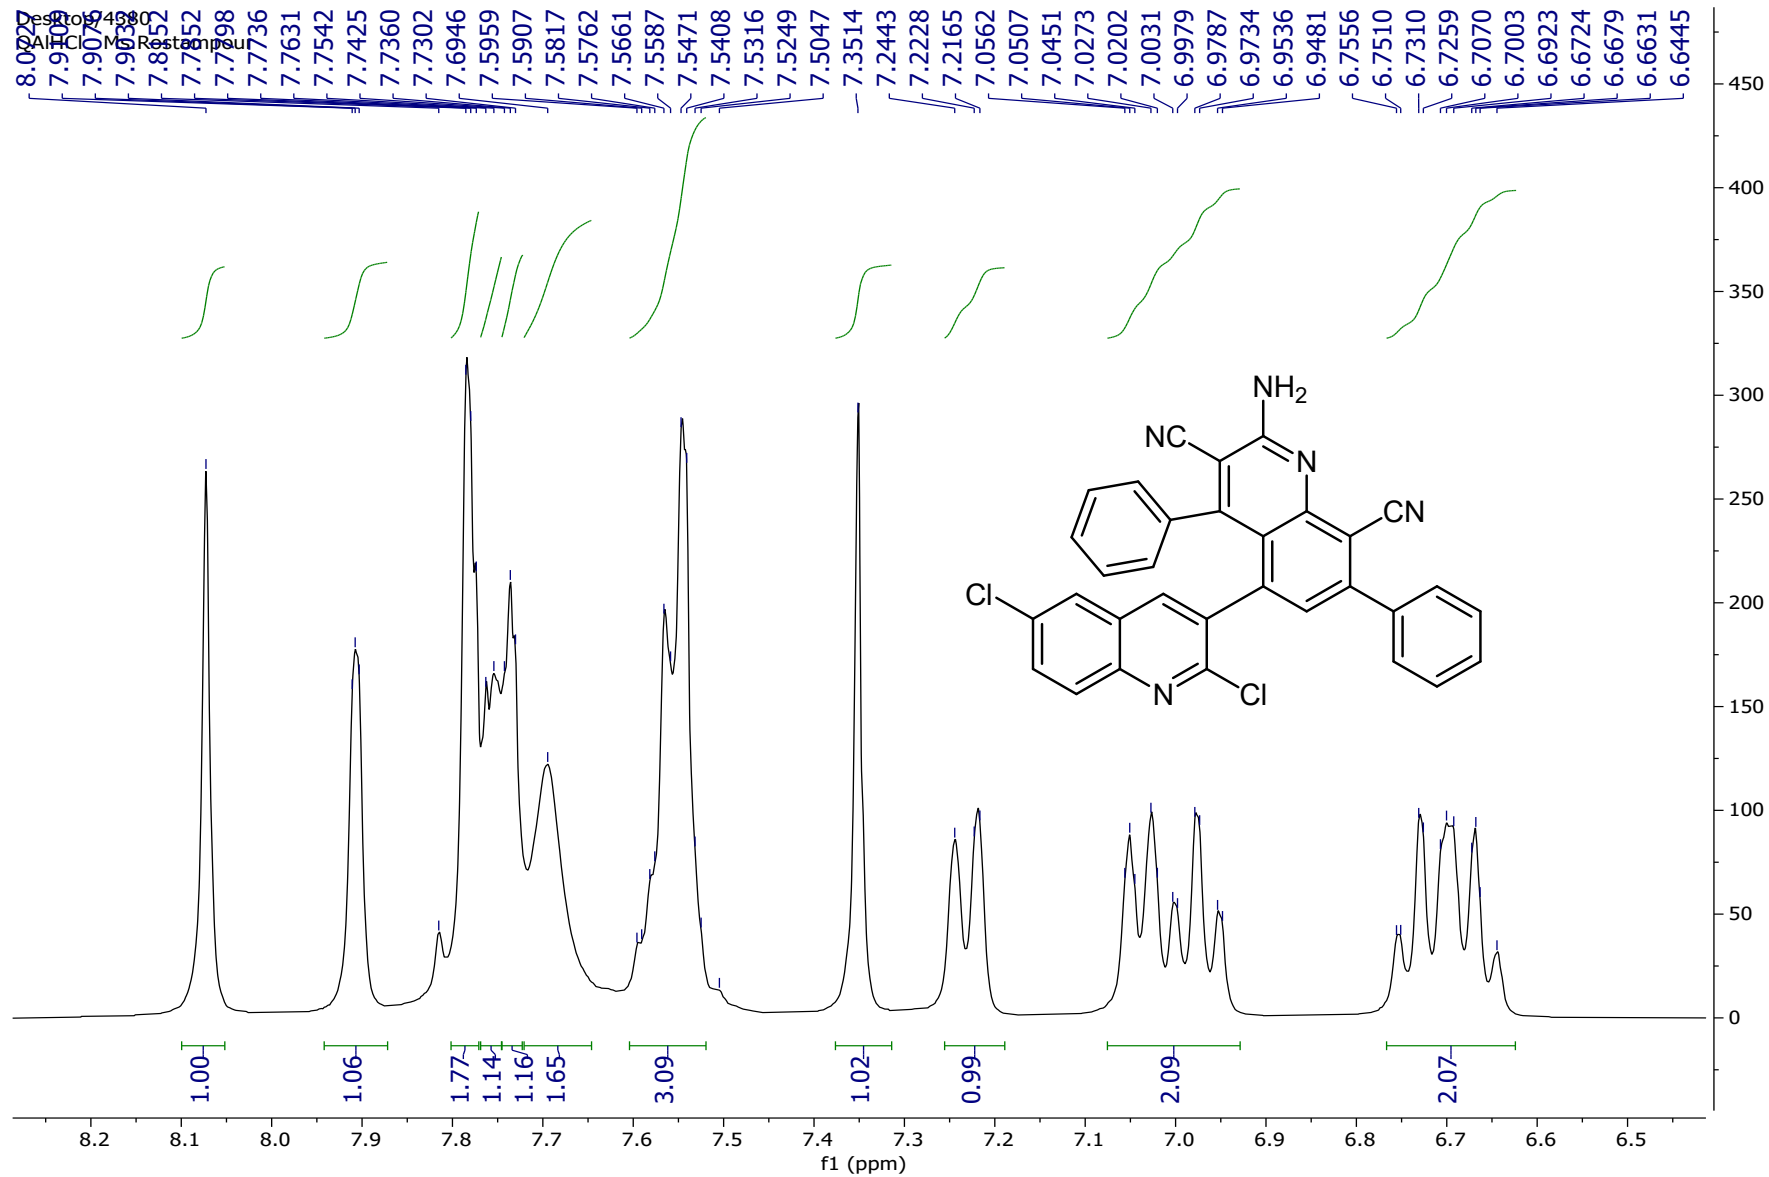

**<sup>1</sup>H NMR Spectrum 3g**

Desktop/4381  
QAIHCl Ms.Rostampour

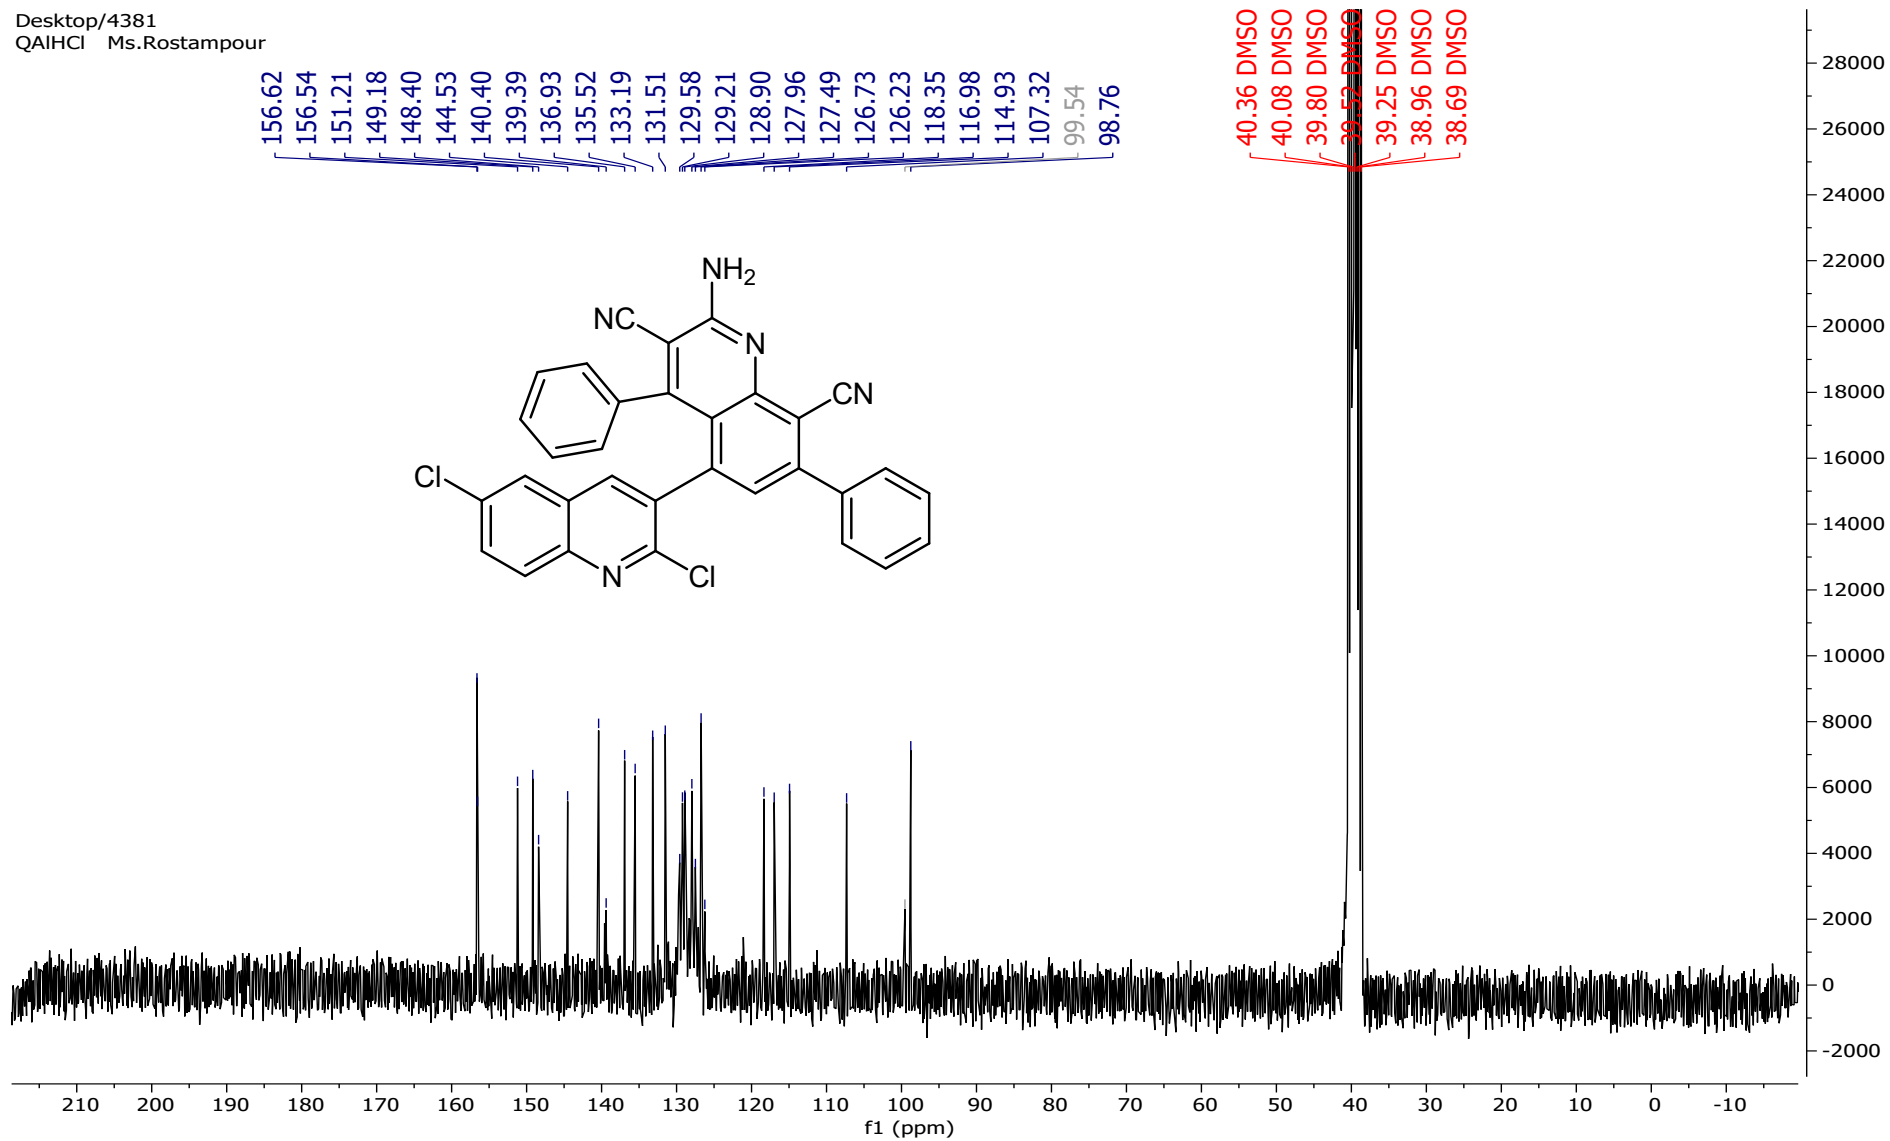

$^{13}\text{C}$  NMR Spectrum **3g**

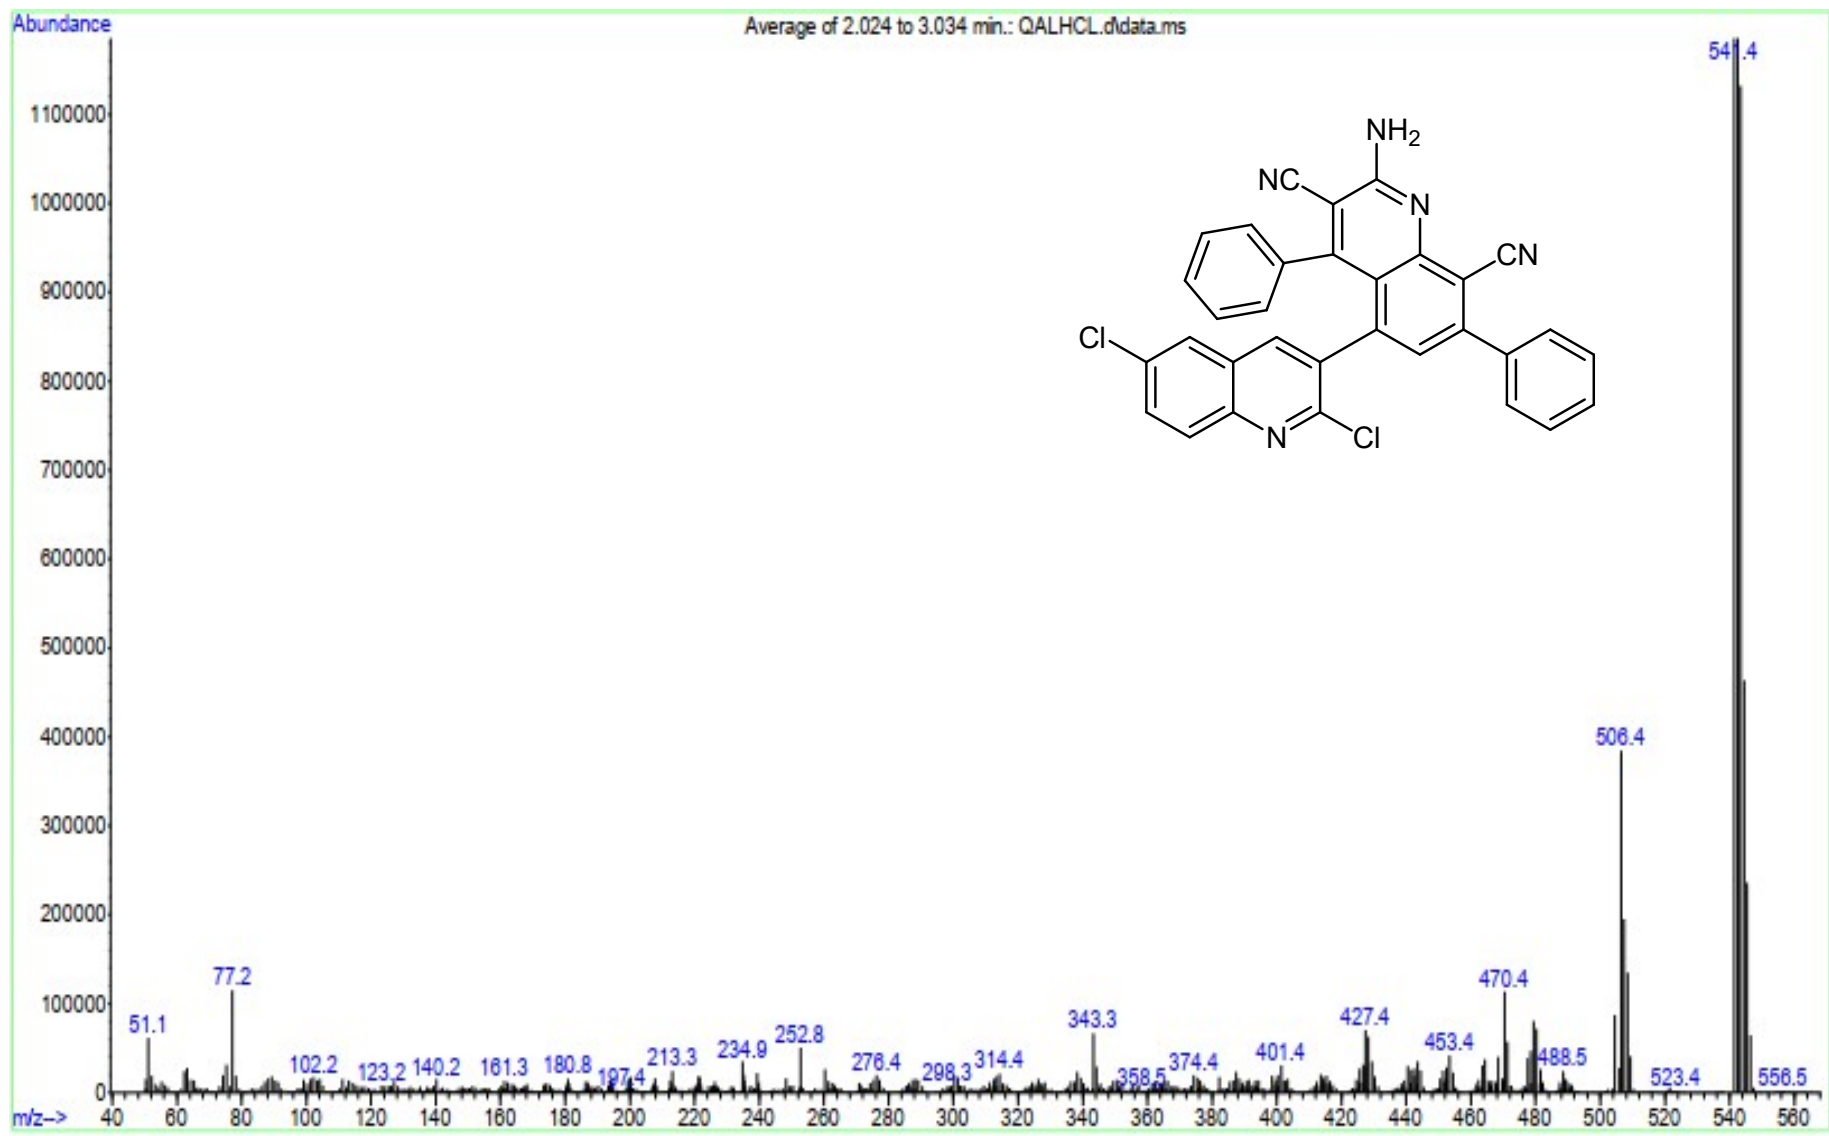

Mass

Spectrum 3g

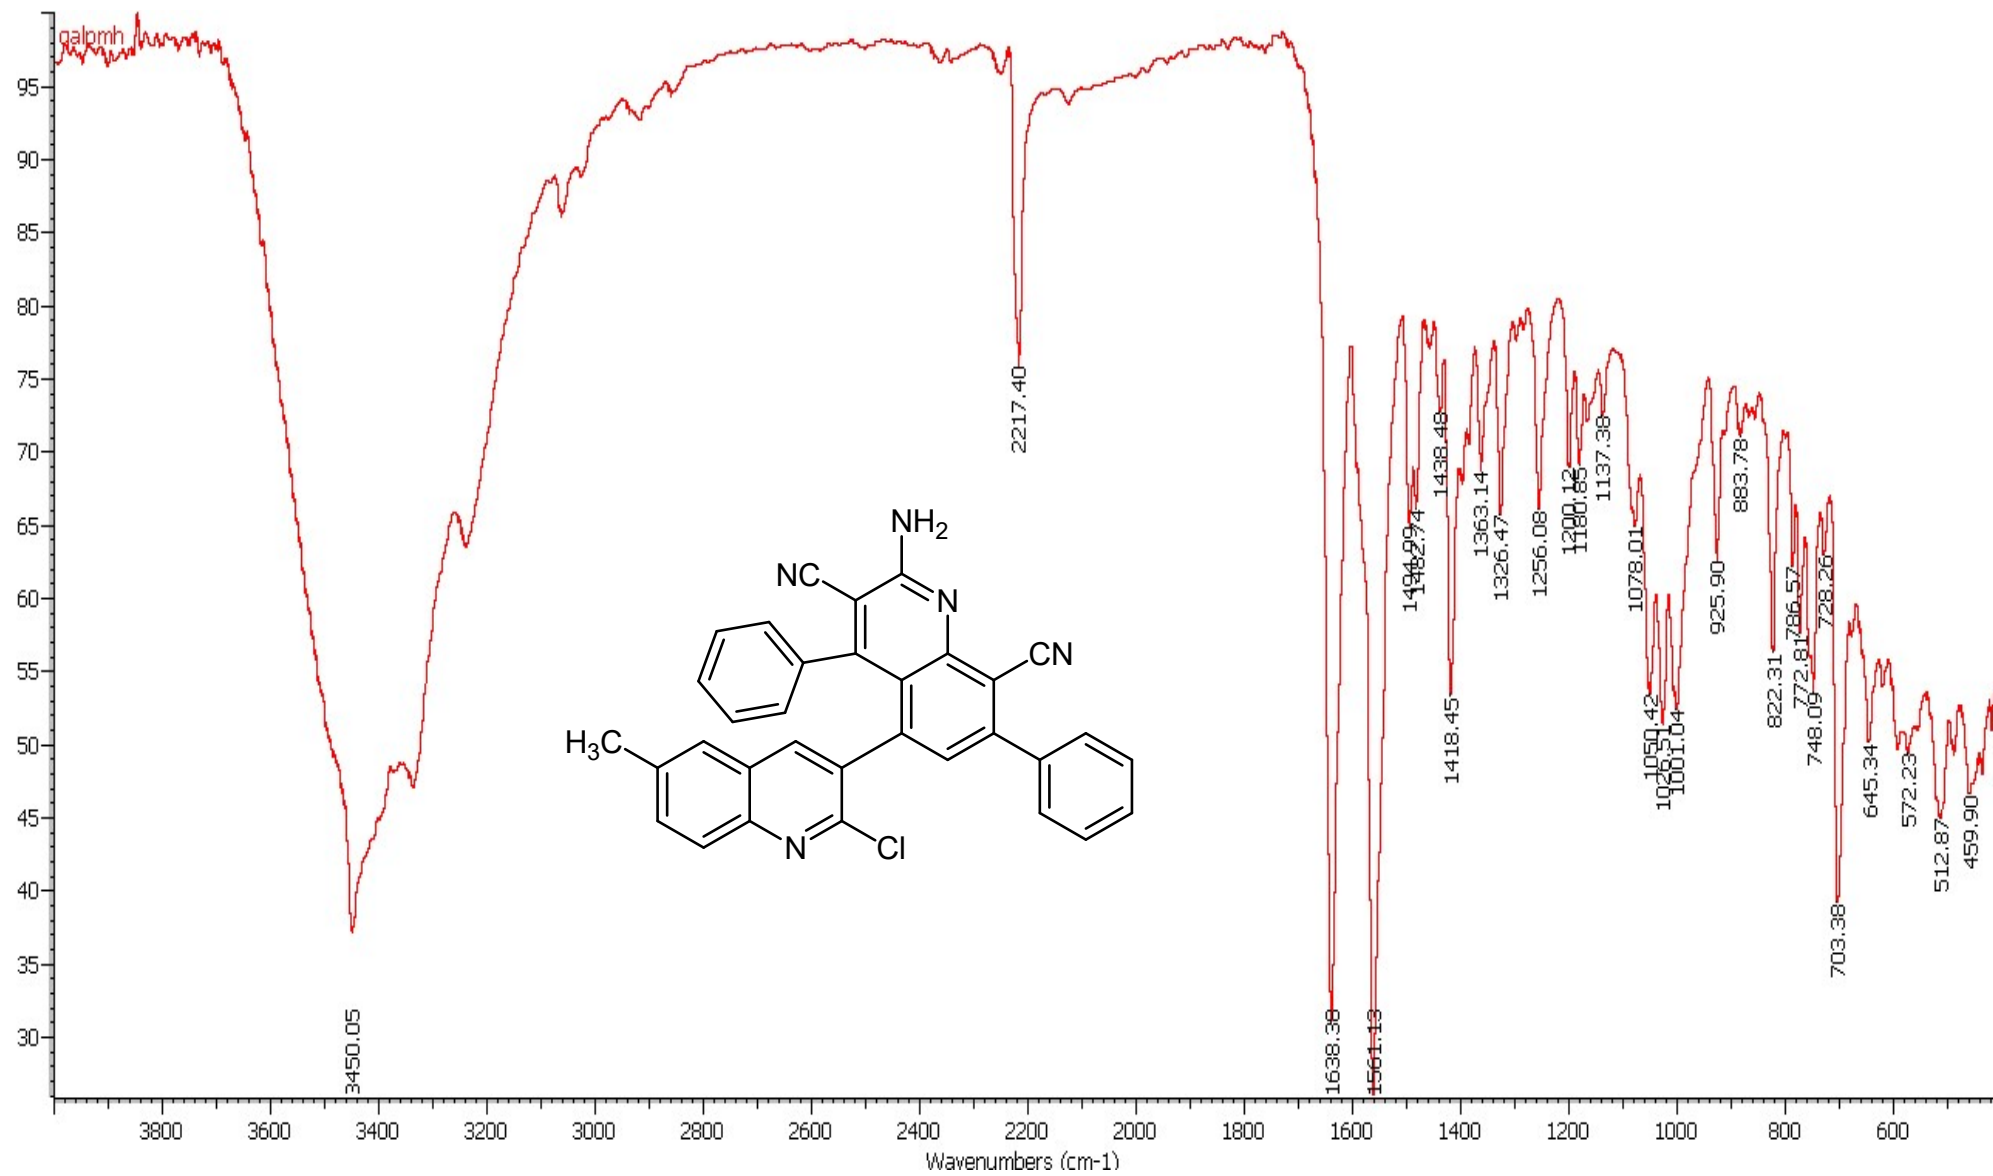

IR Spectrum **3h**



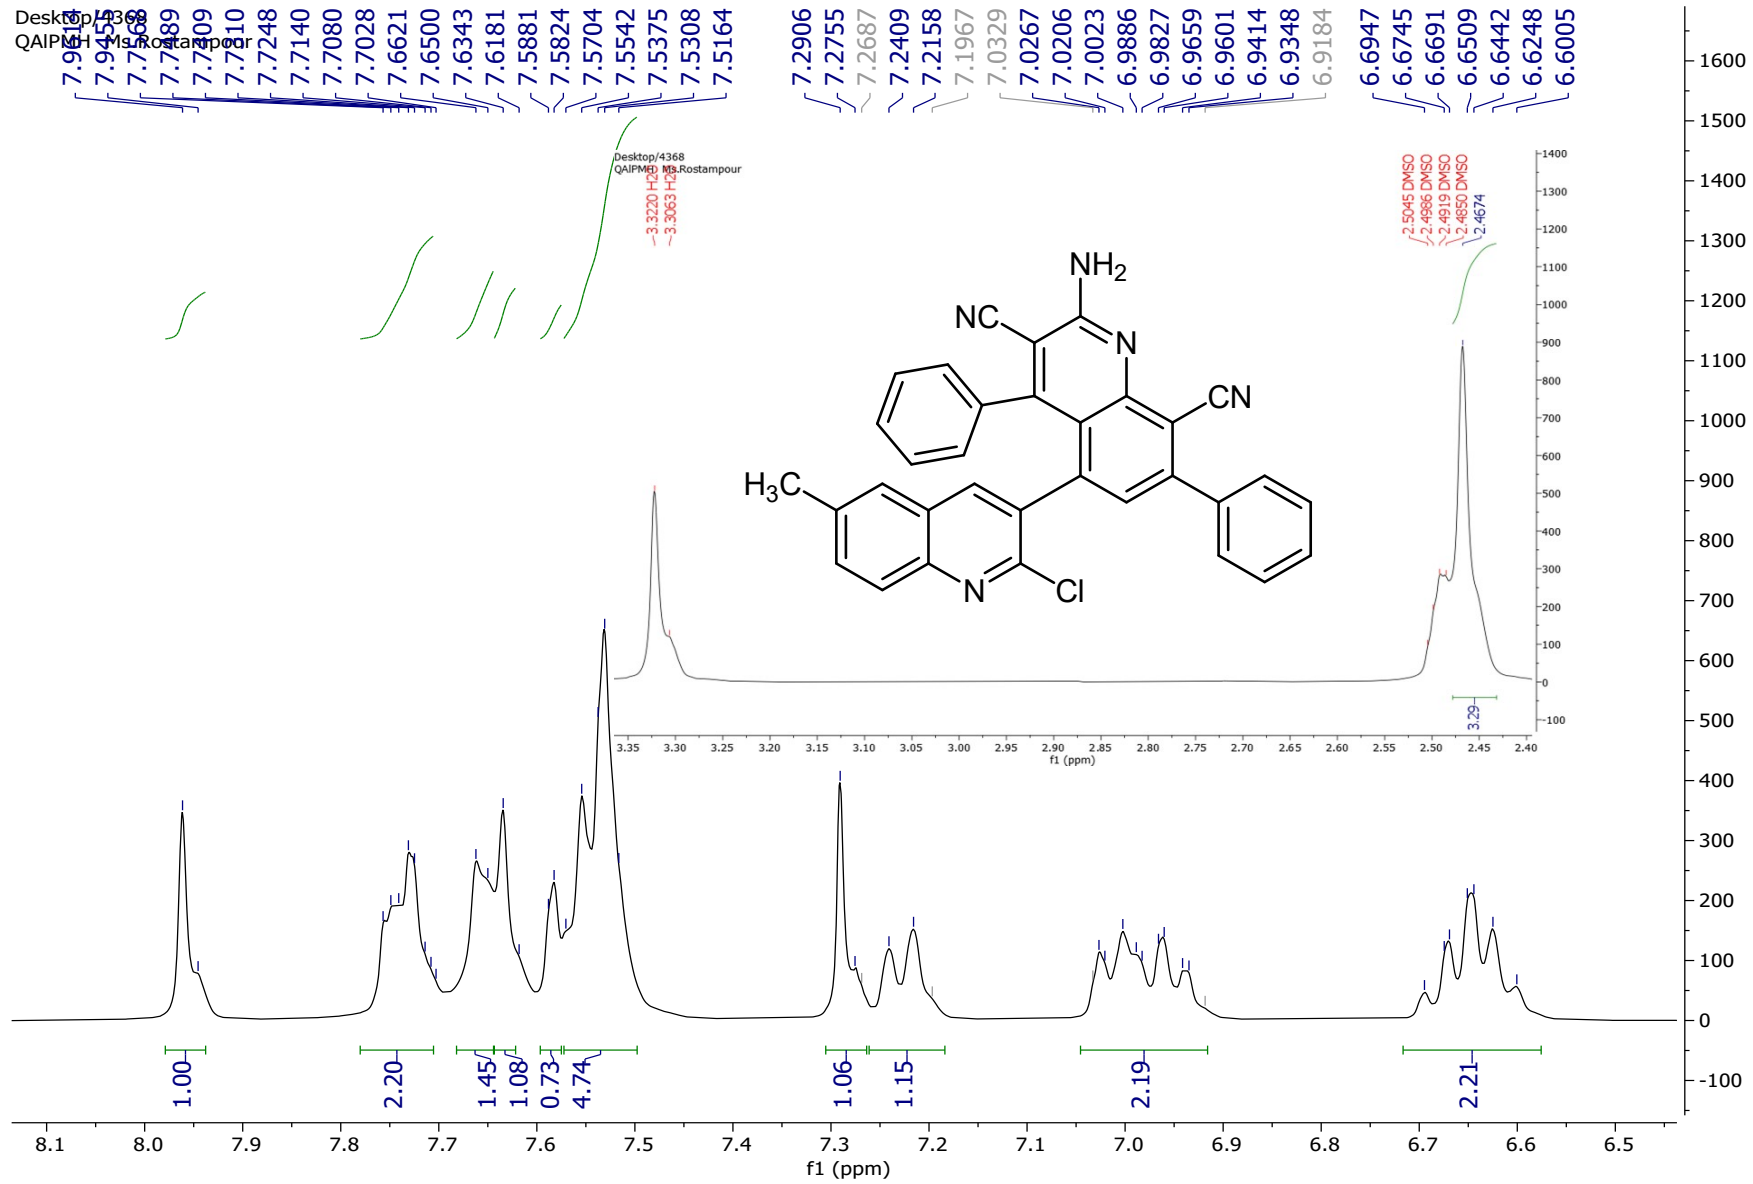

<sup>1</sup>H NMR Spectrum 3h

Desktop/4369  
QAIPMH Ms.Rostampour

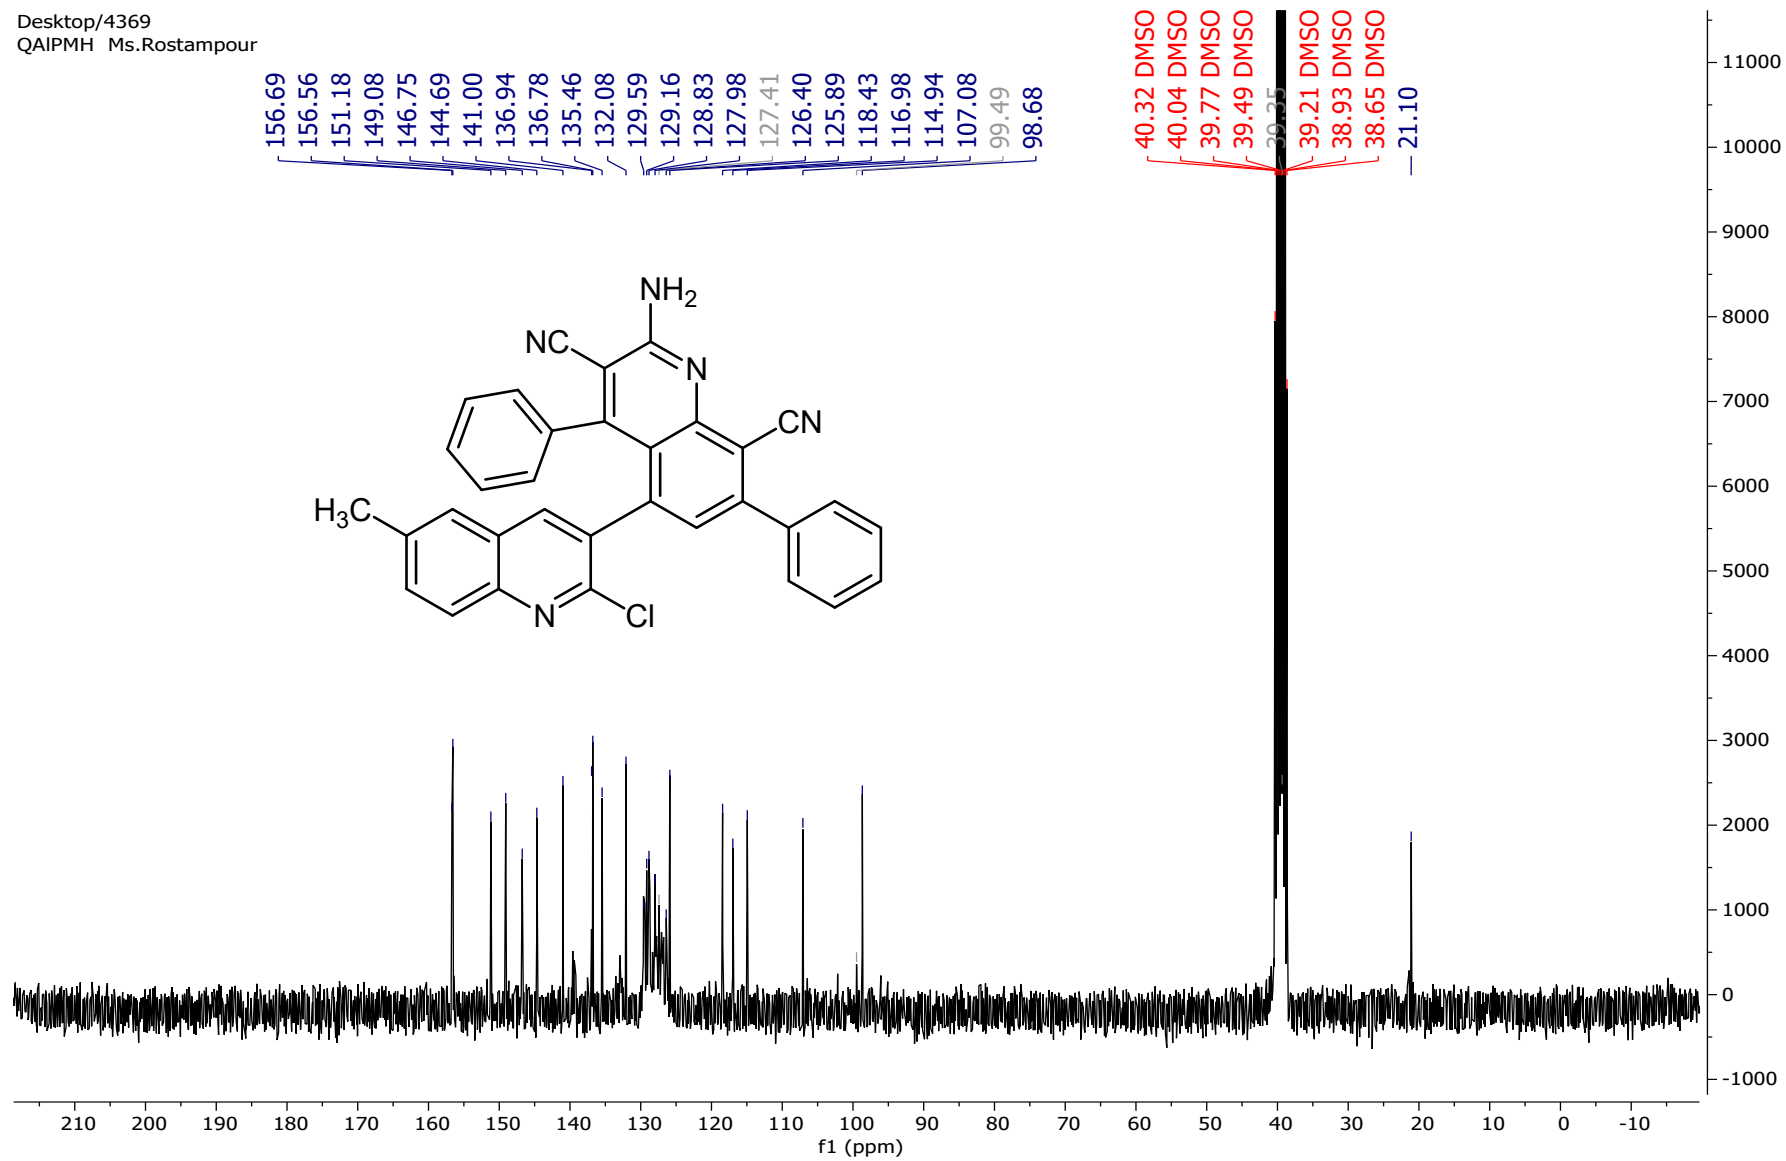

<sup>13</sup>C NMR Spectrum 3h

Sample Name:  
Misc Info :  
Vial Number: 1

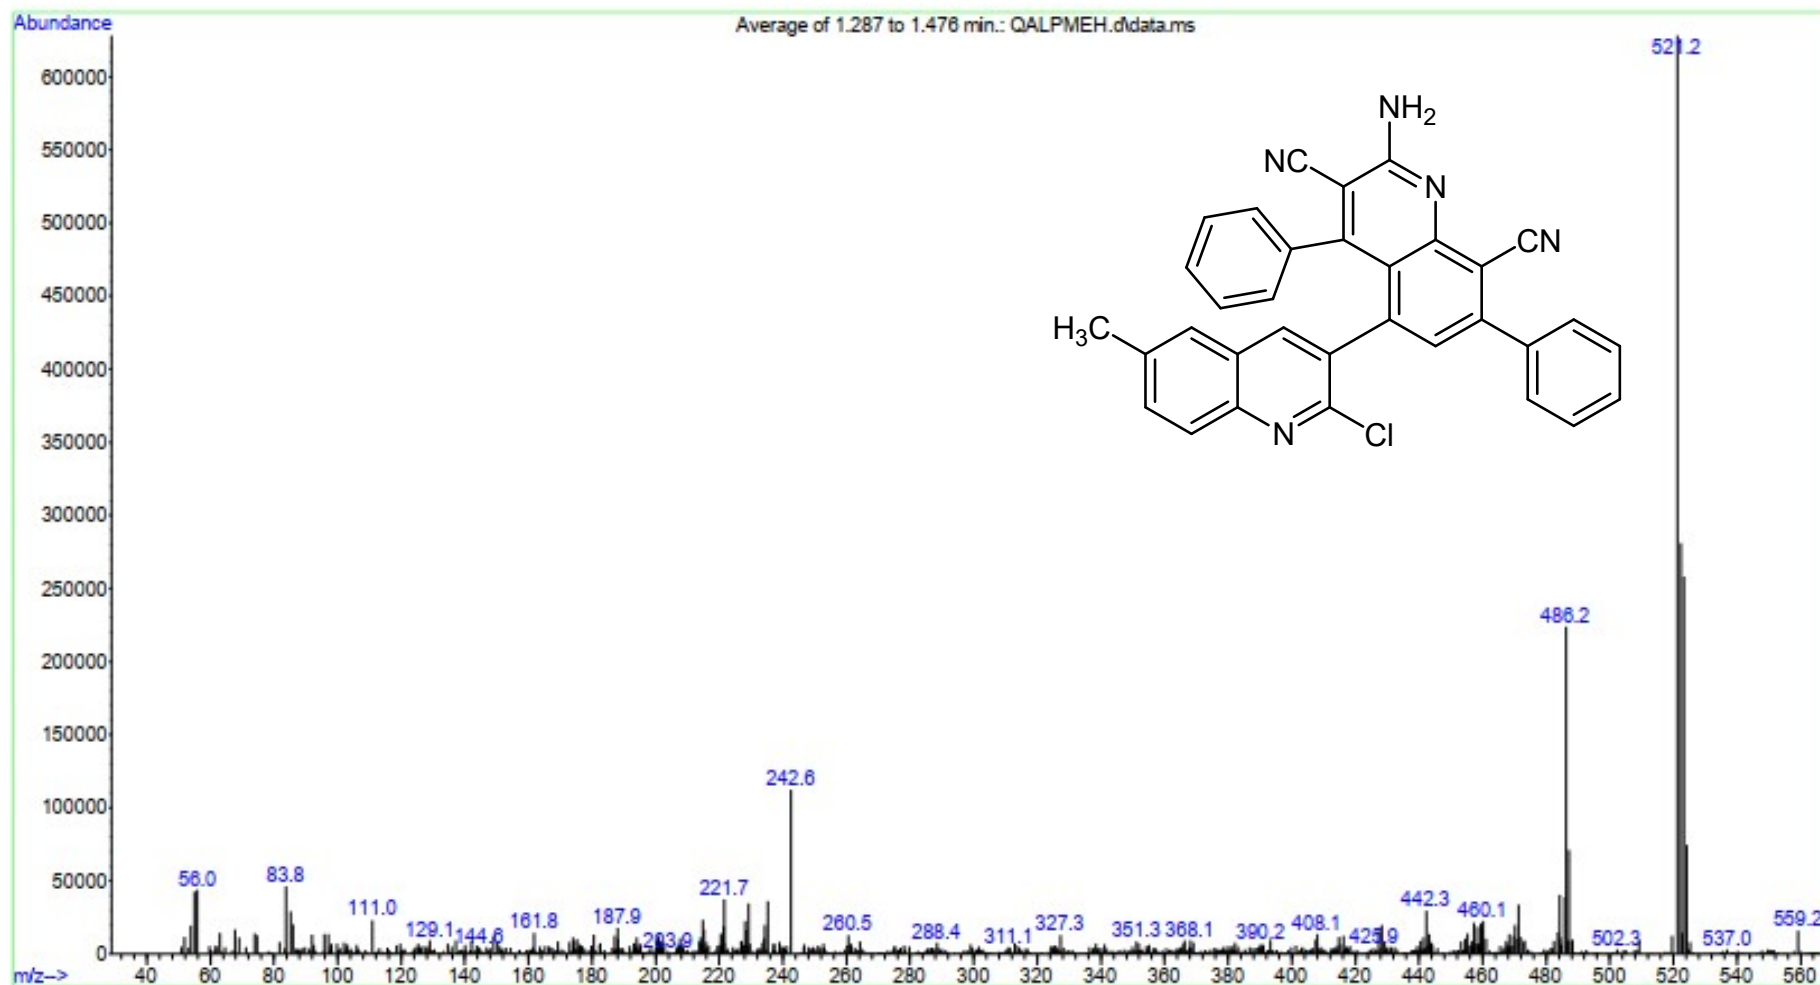

Mass spectrum **3h**

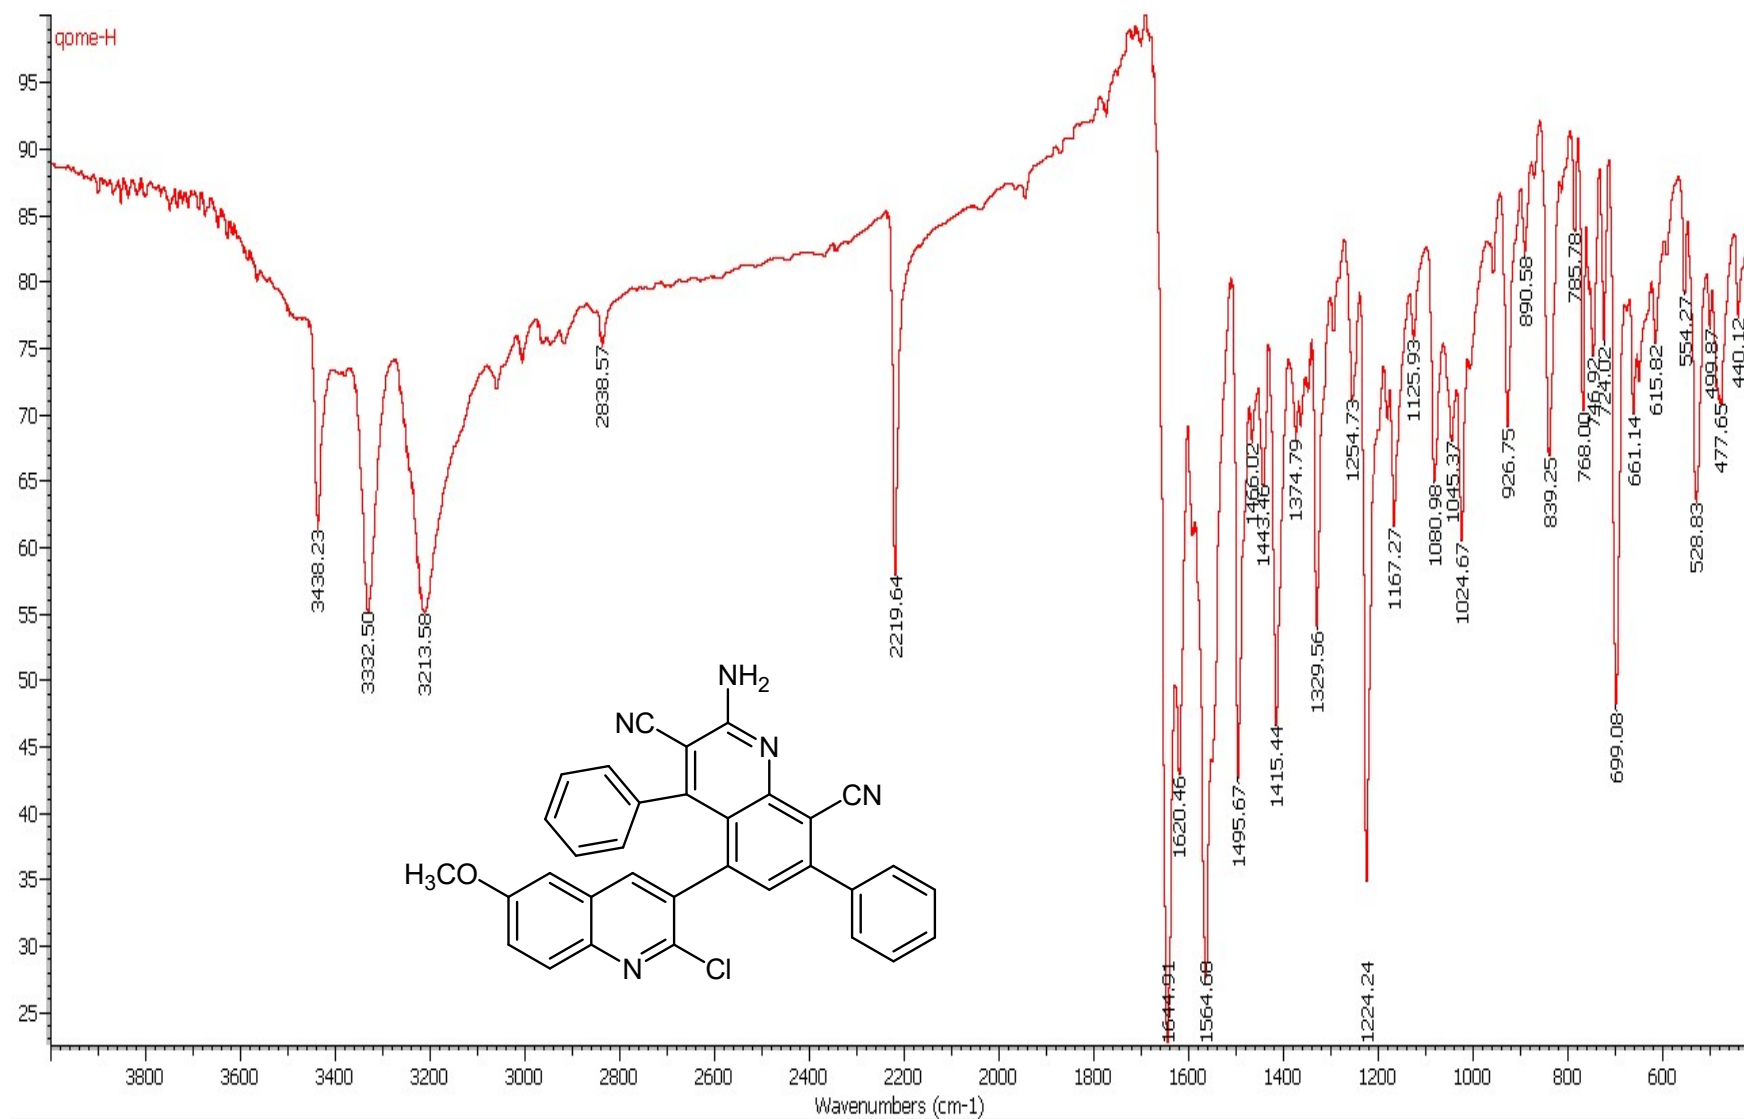

IR Spectrum **3i**

Desktop/4366  
QOMeH Ms.Rostampour

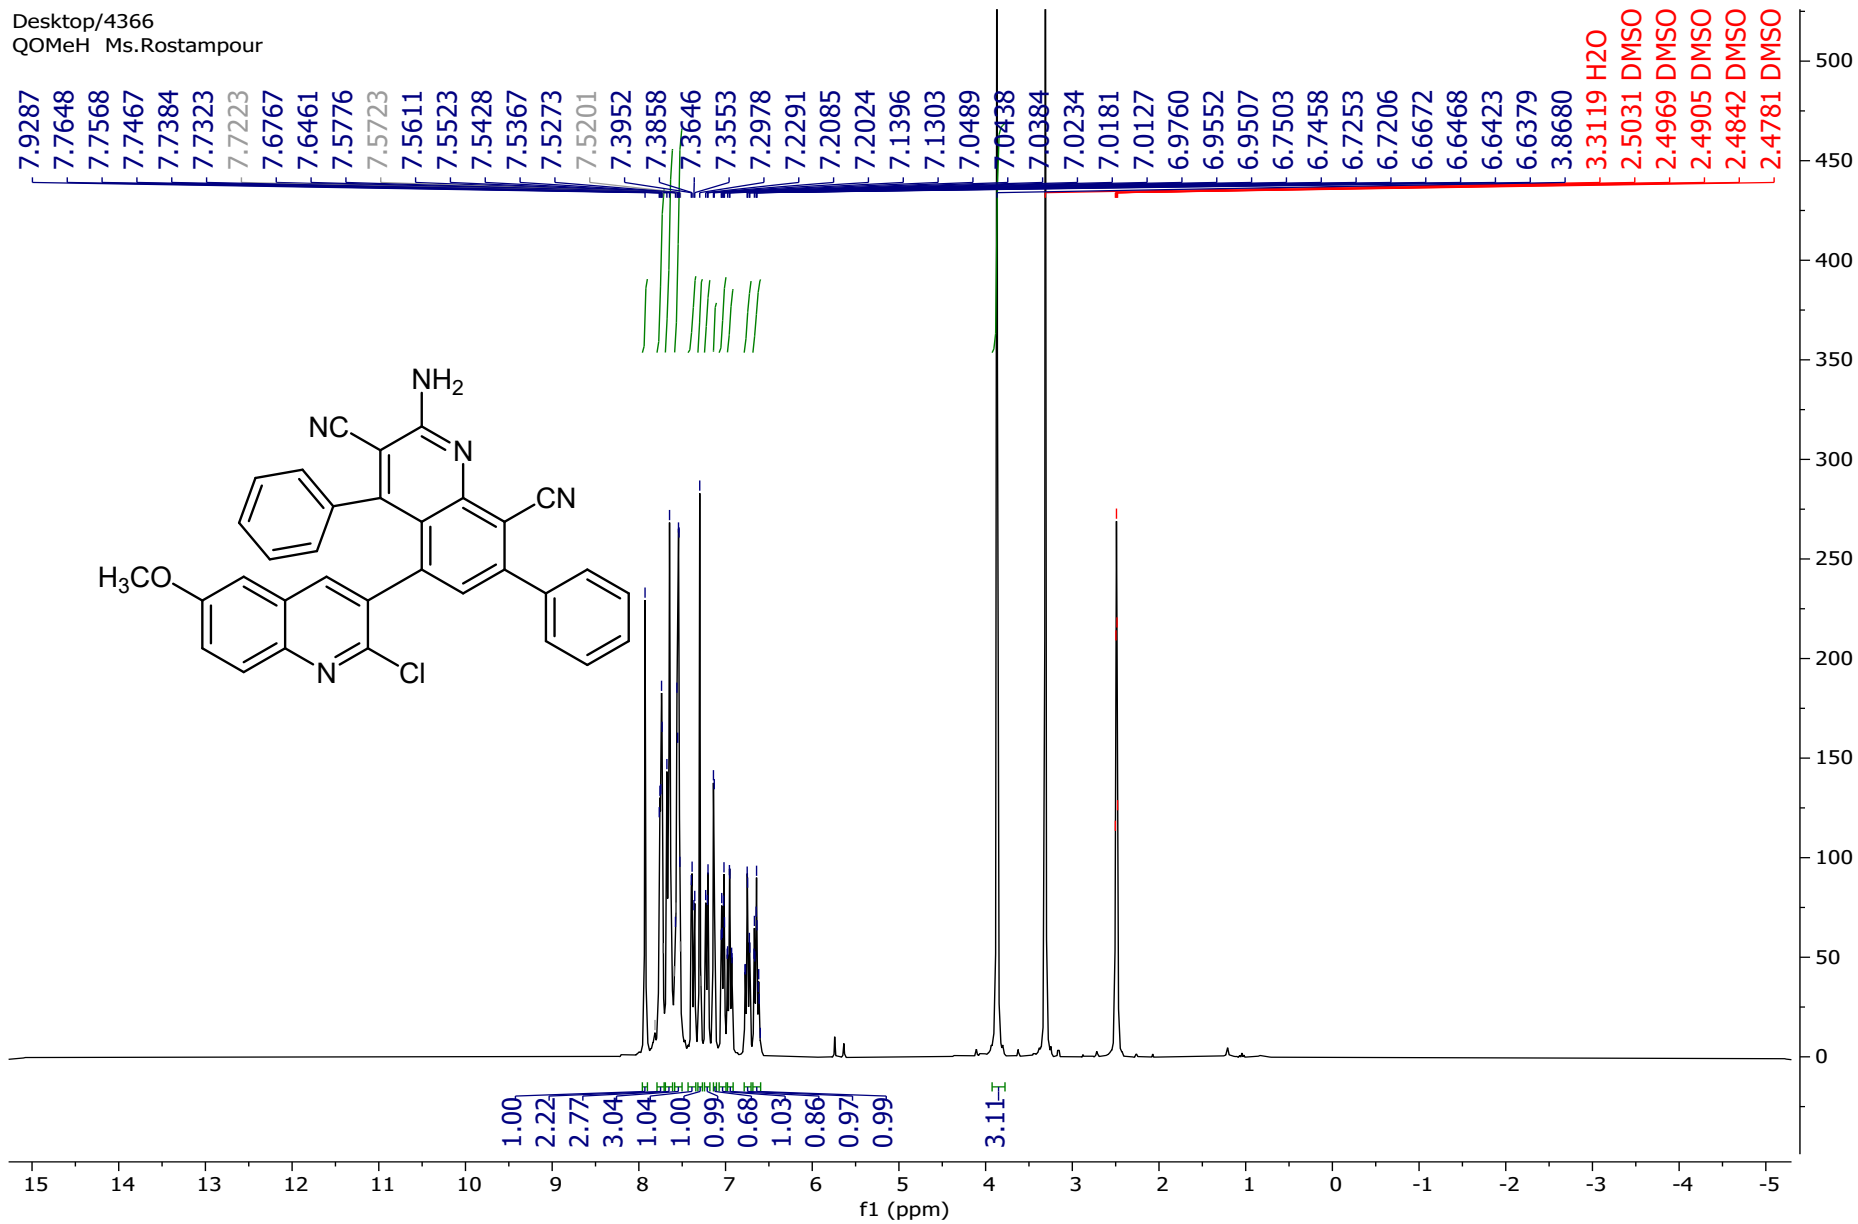

<sup>1</sup>H NMR Spectrum 3i

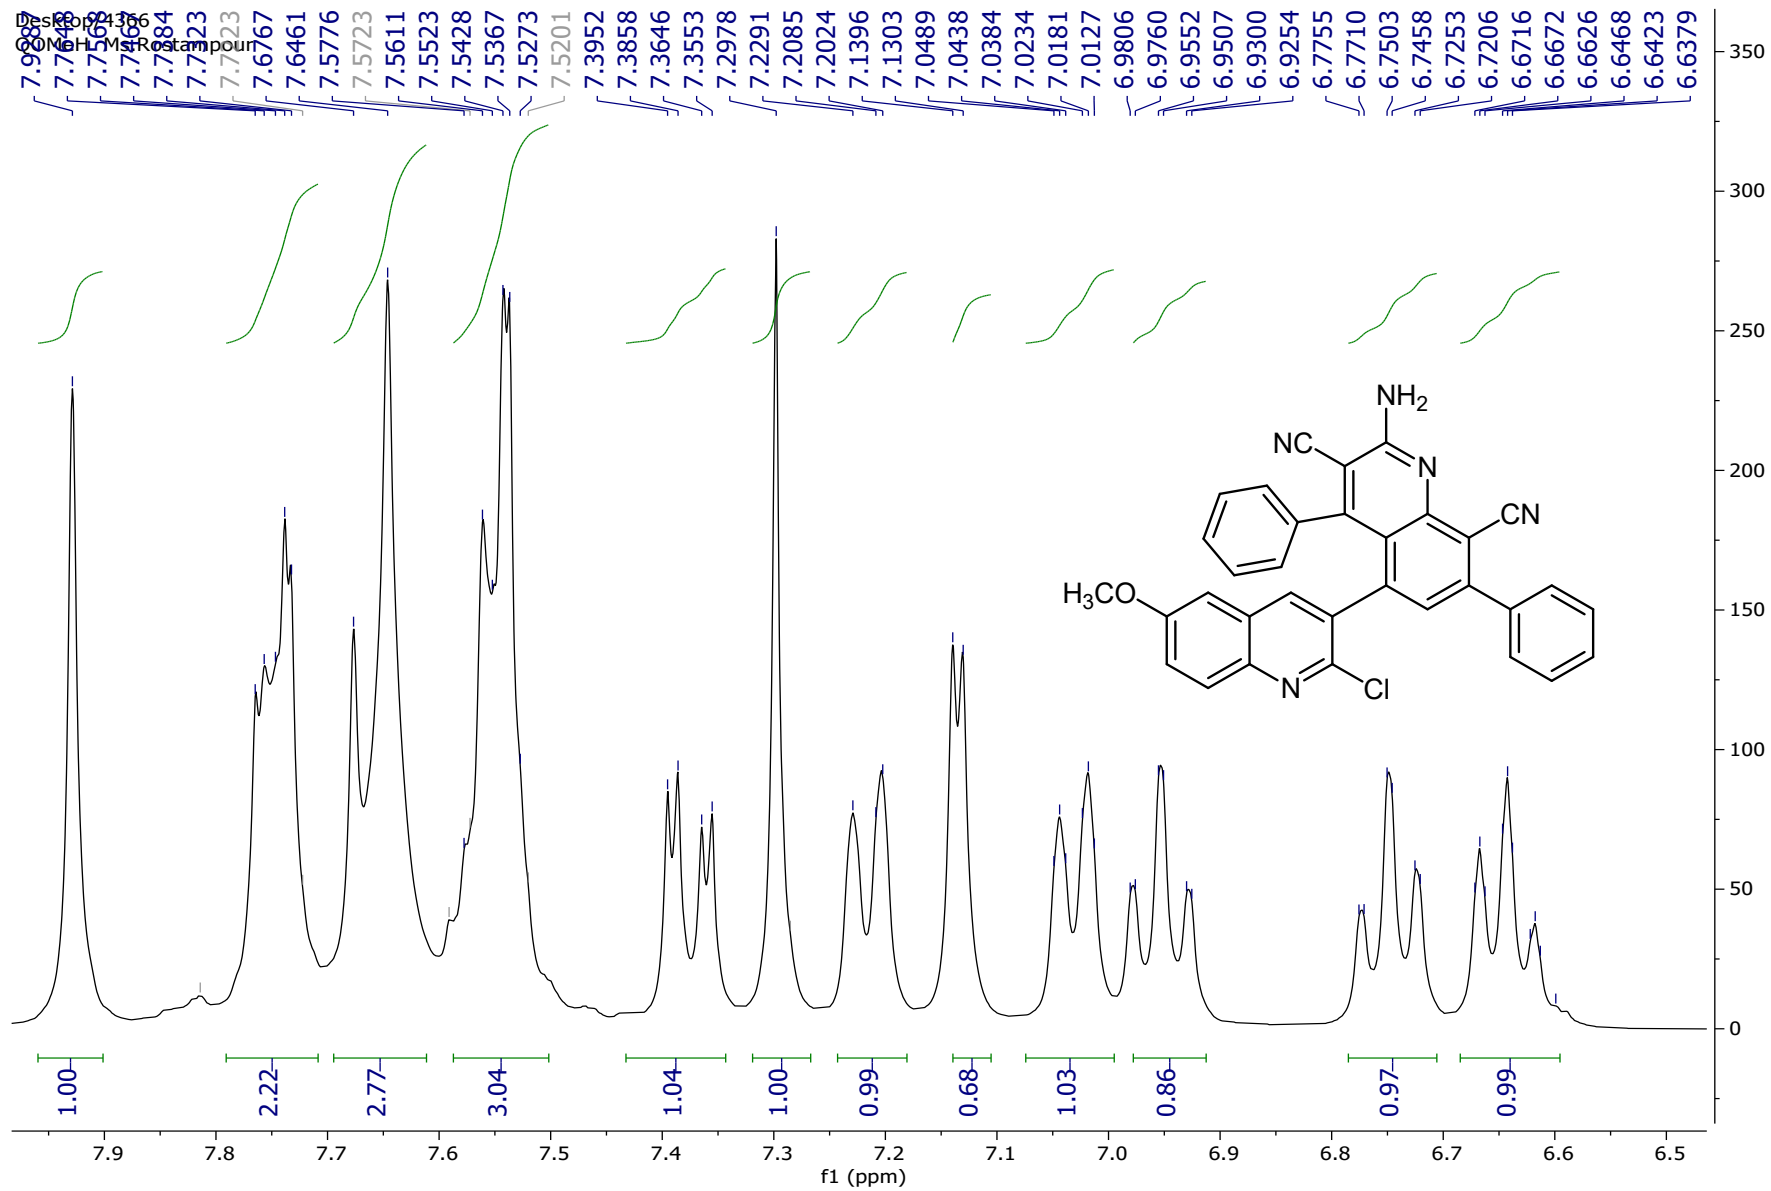

# <sup>1</sup>H NMR Spectrum 3i

Desktop/4367  
QOMeH Ms.Rostampour

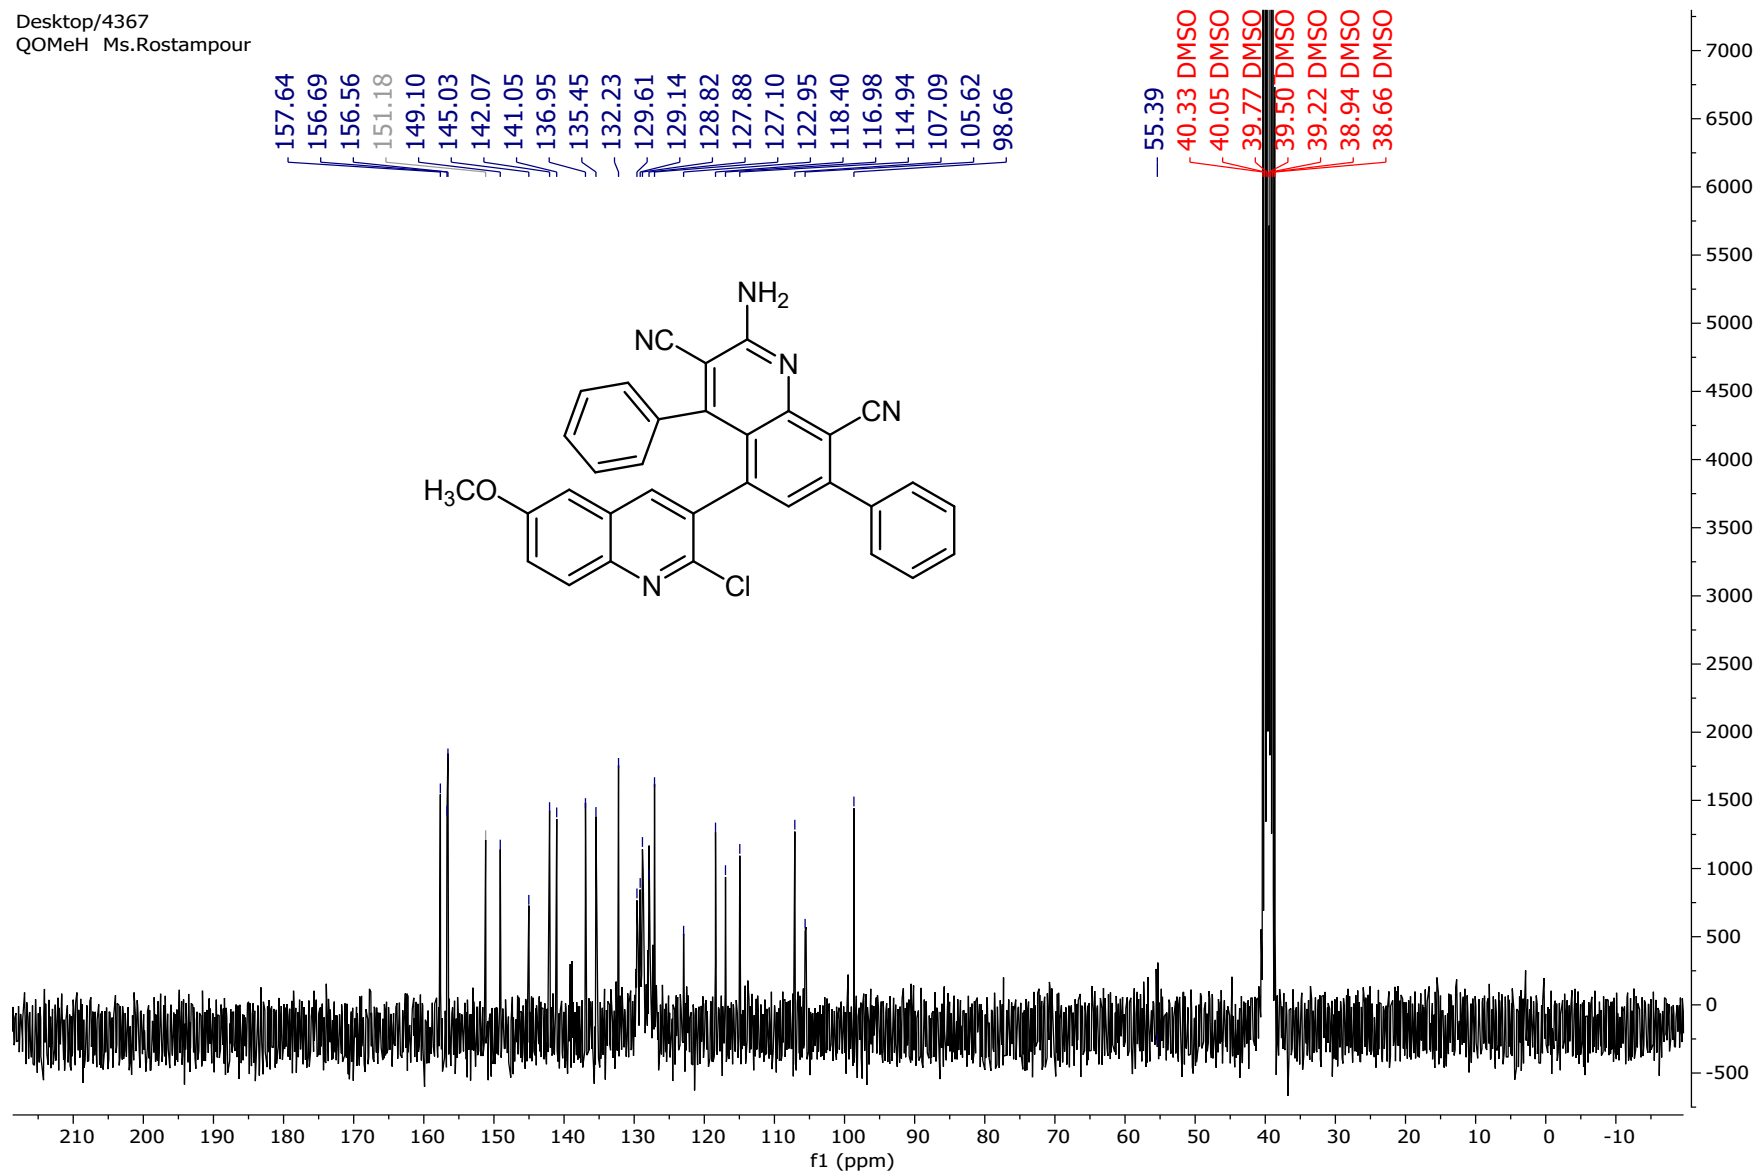

<sup>13</sup>C NMR Spectrum **3i**

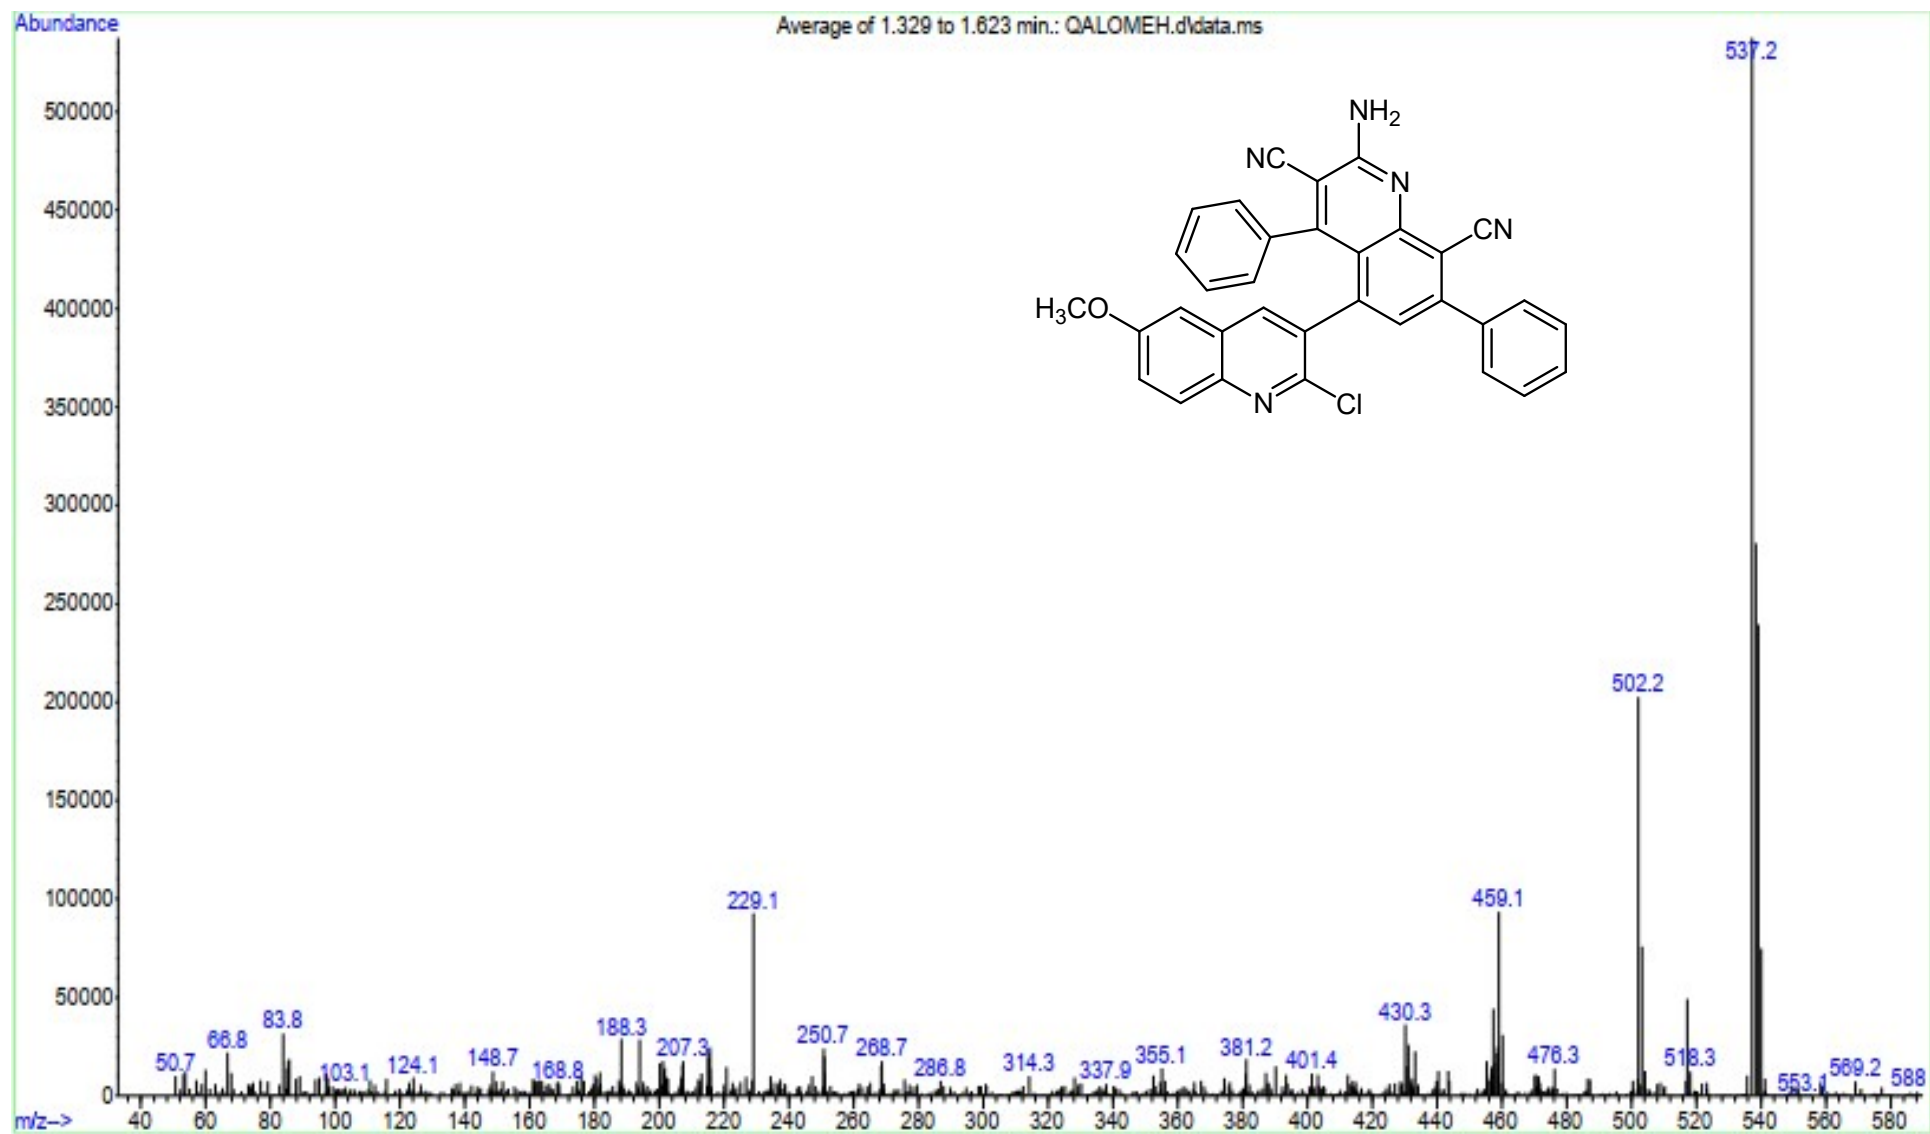



Mass spectrum 3i

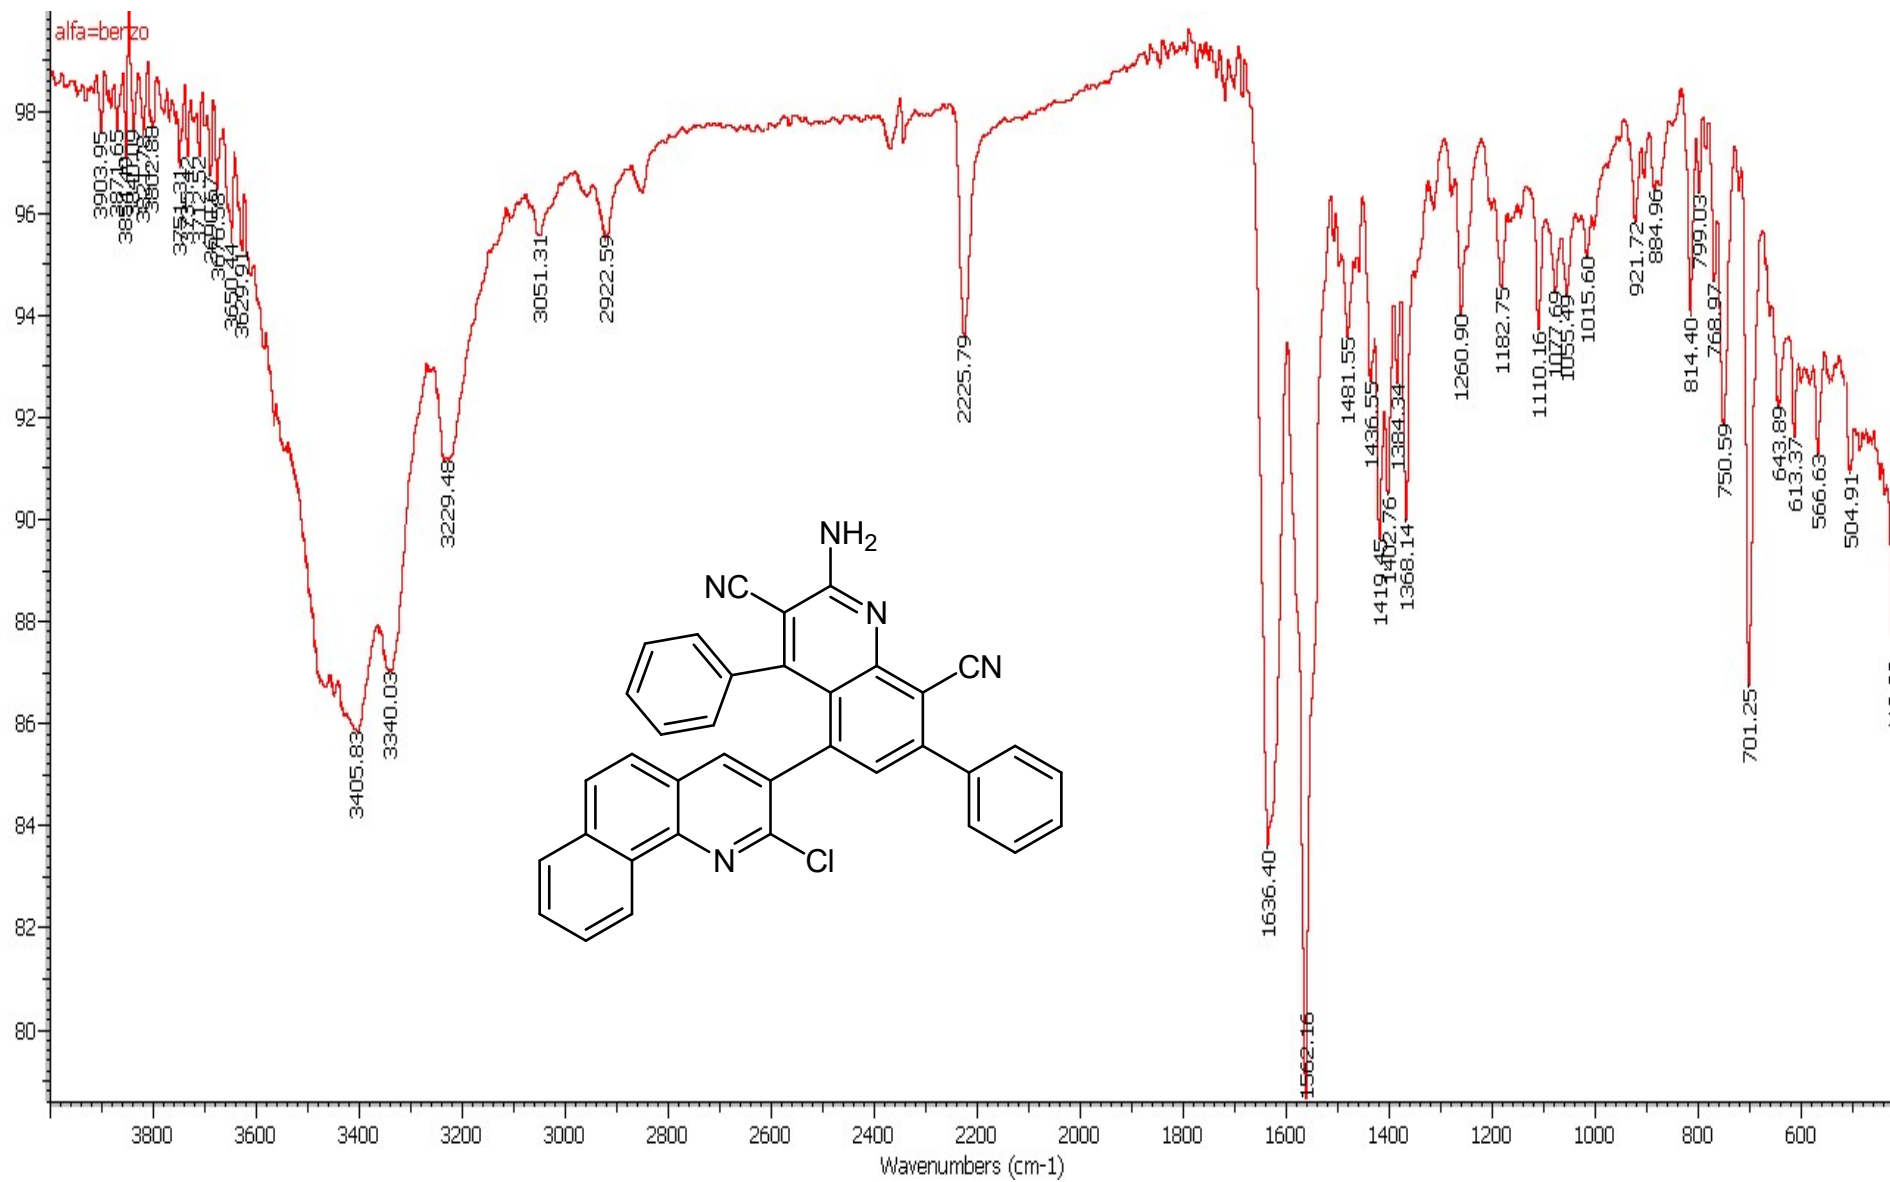

# IR Spectrum 3j

New folder (2)/4439  
Benzofa Ms.Rostampour

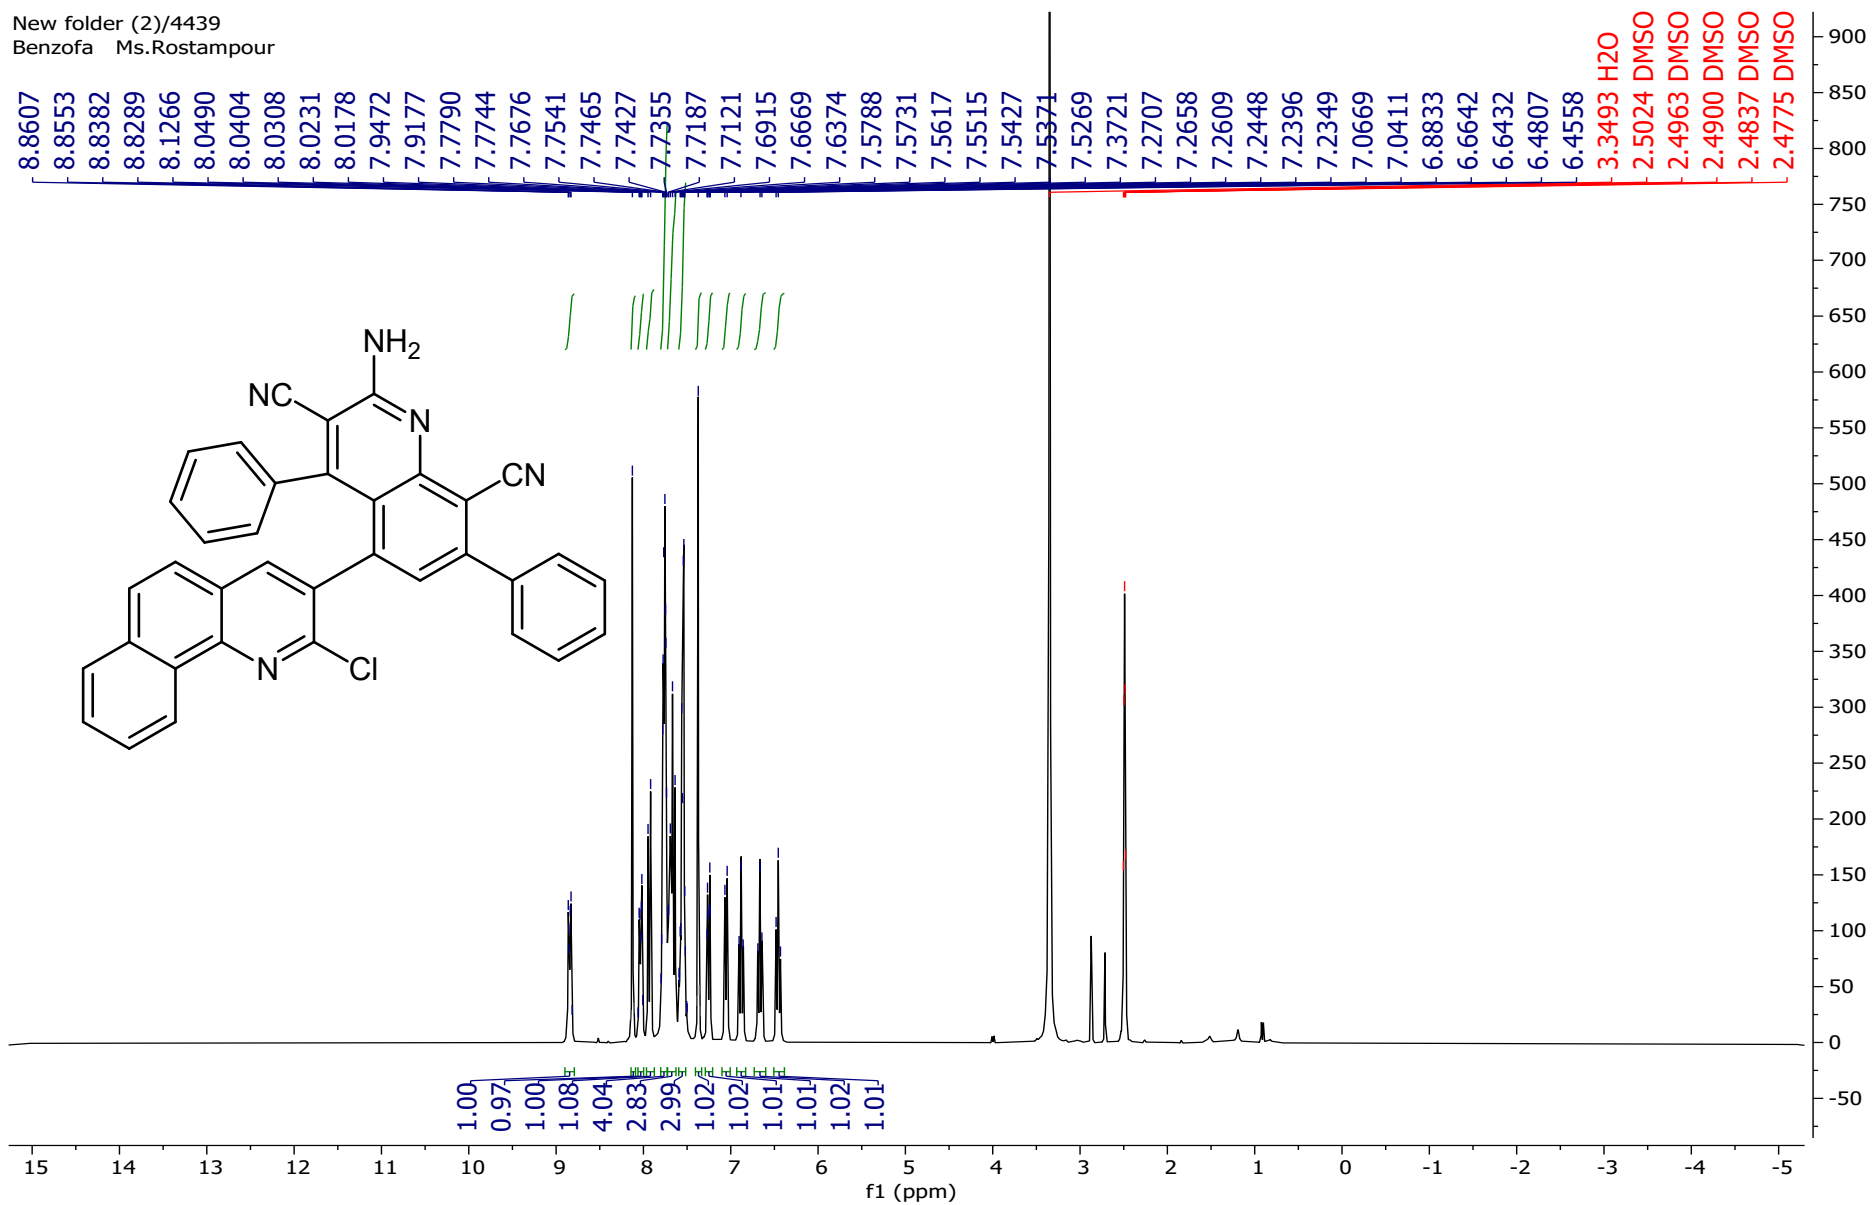

<sup>1</sup>H NMR Spectrum 3j

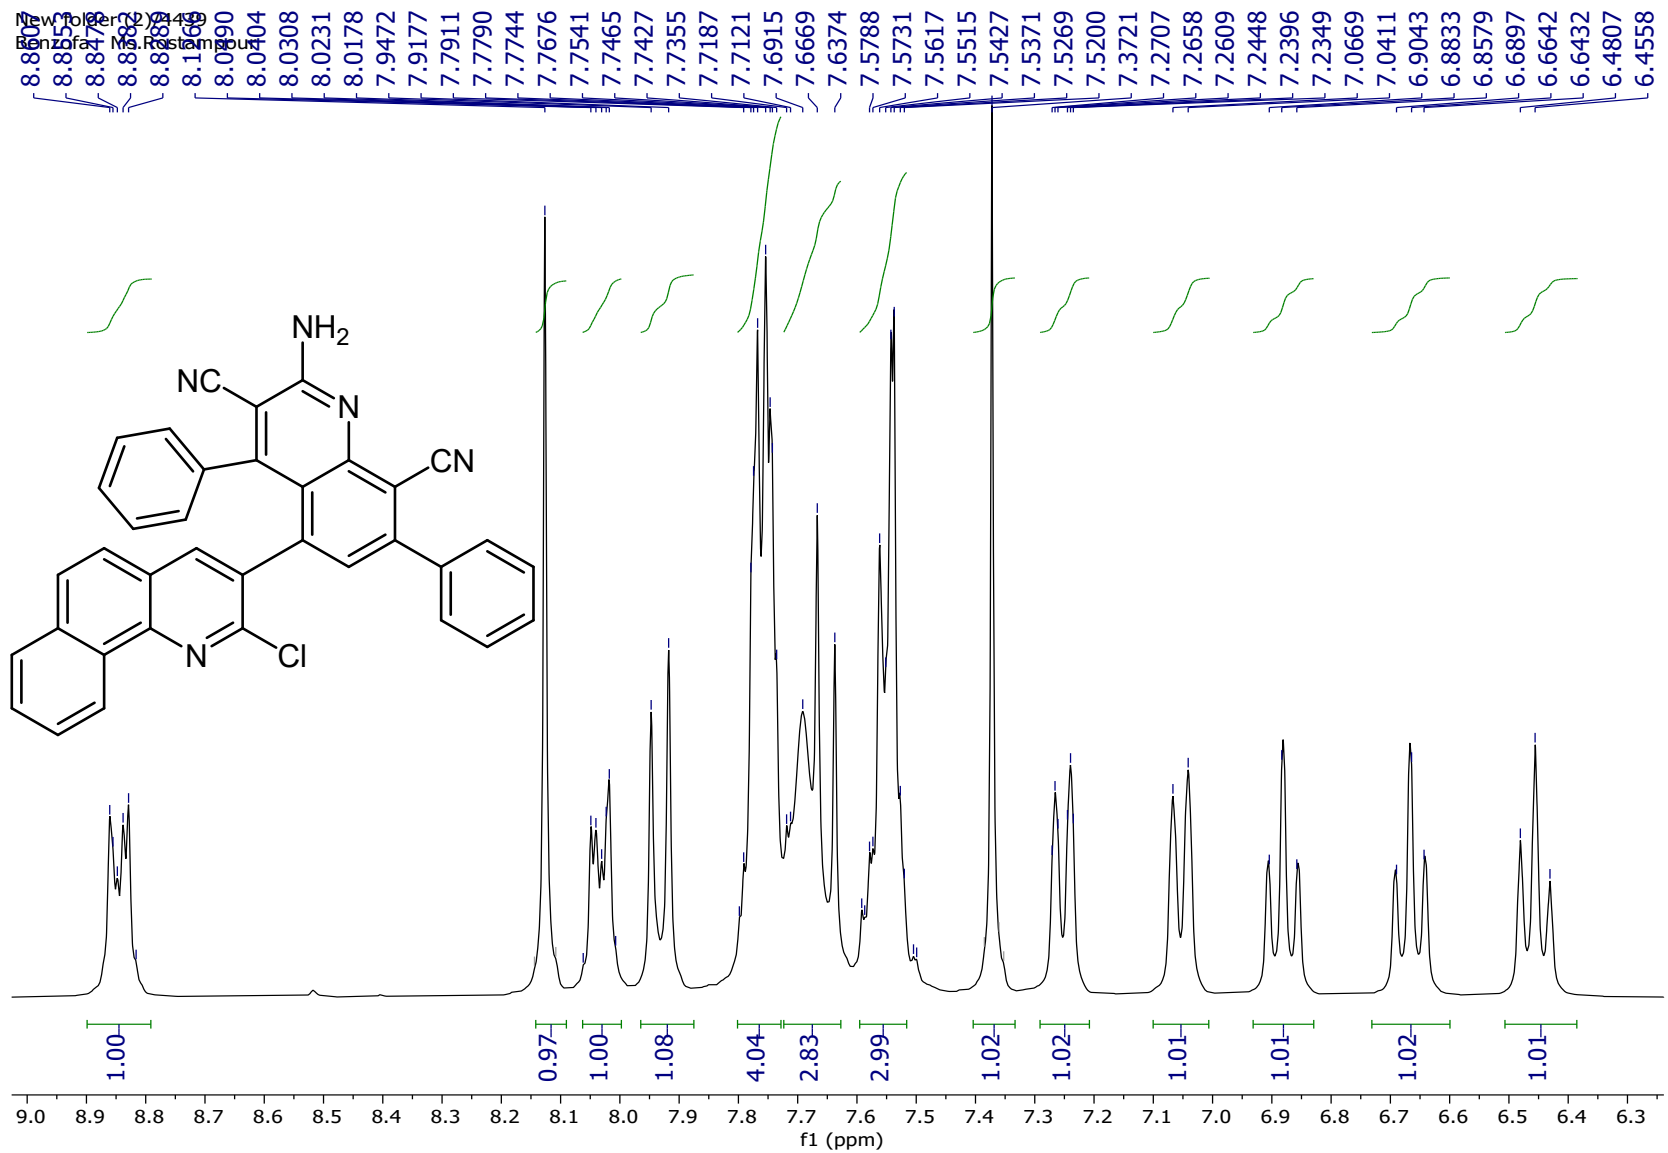

# <sup>1</sup>H NMR Spectrum 3j

New folder (2)/4440  
Benzofa Ms.Rostampour

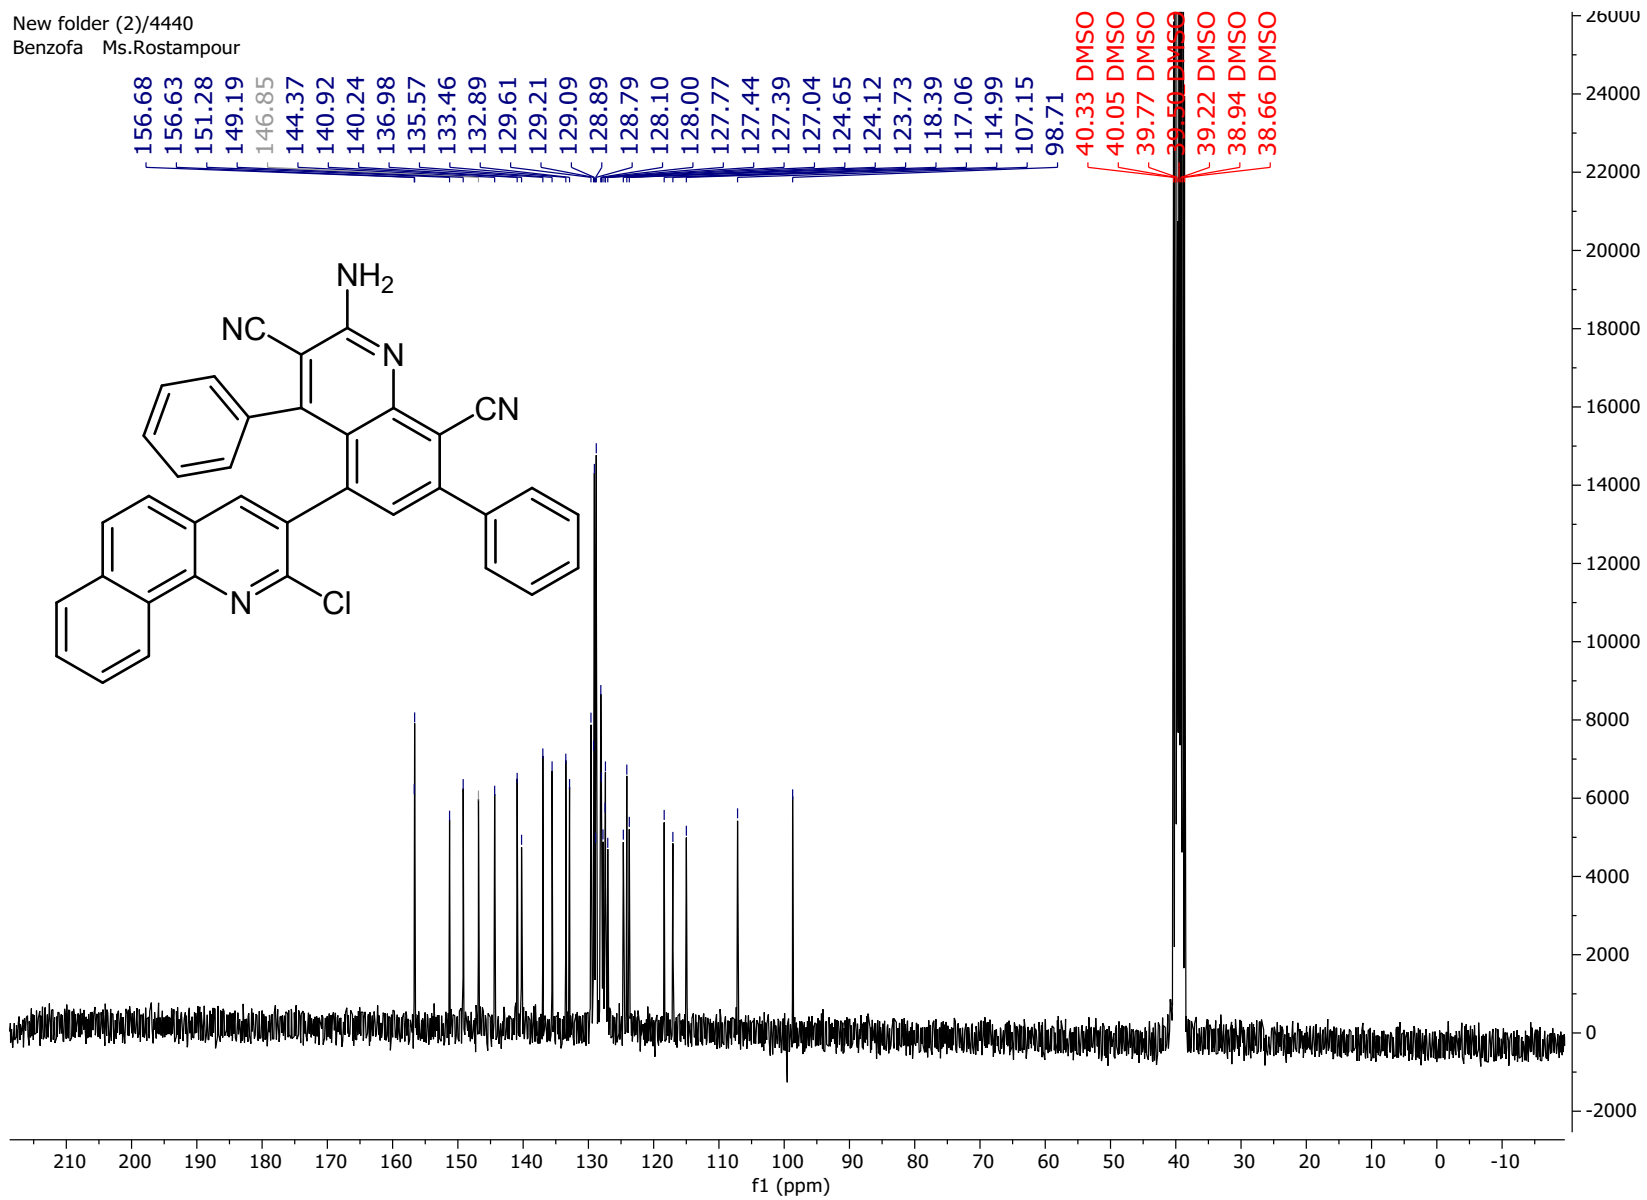

<sup>13</sup>C NMR spectrum **3j**

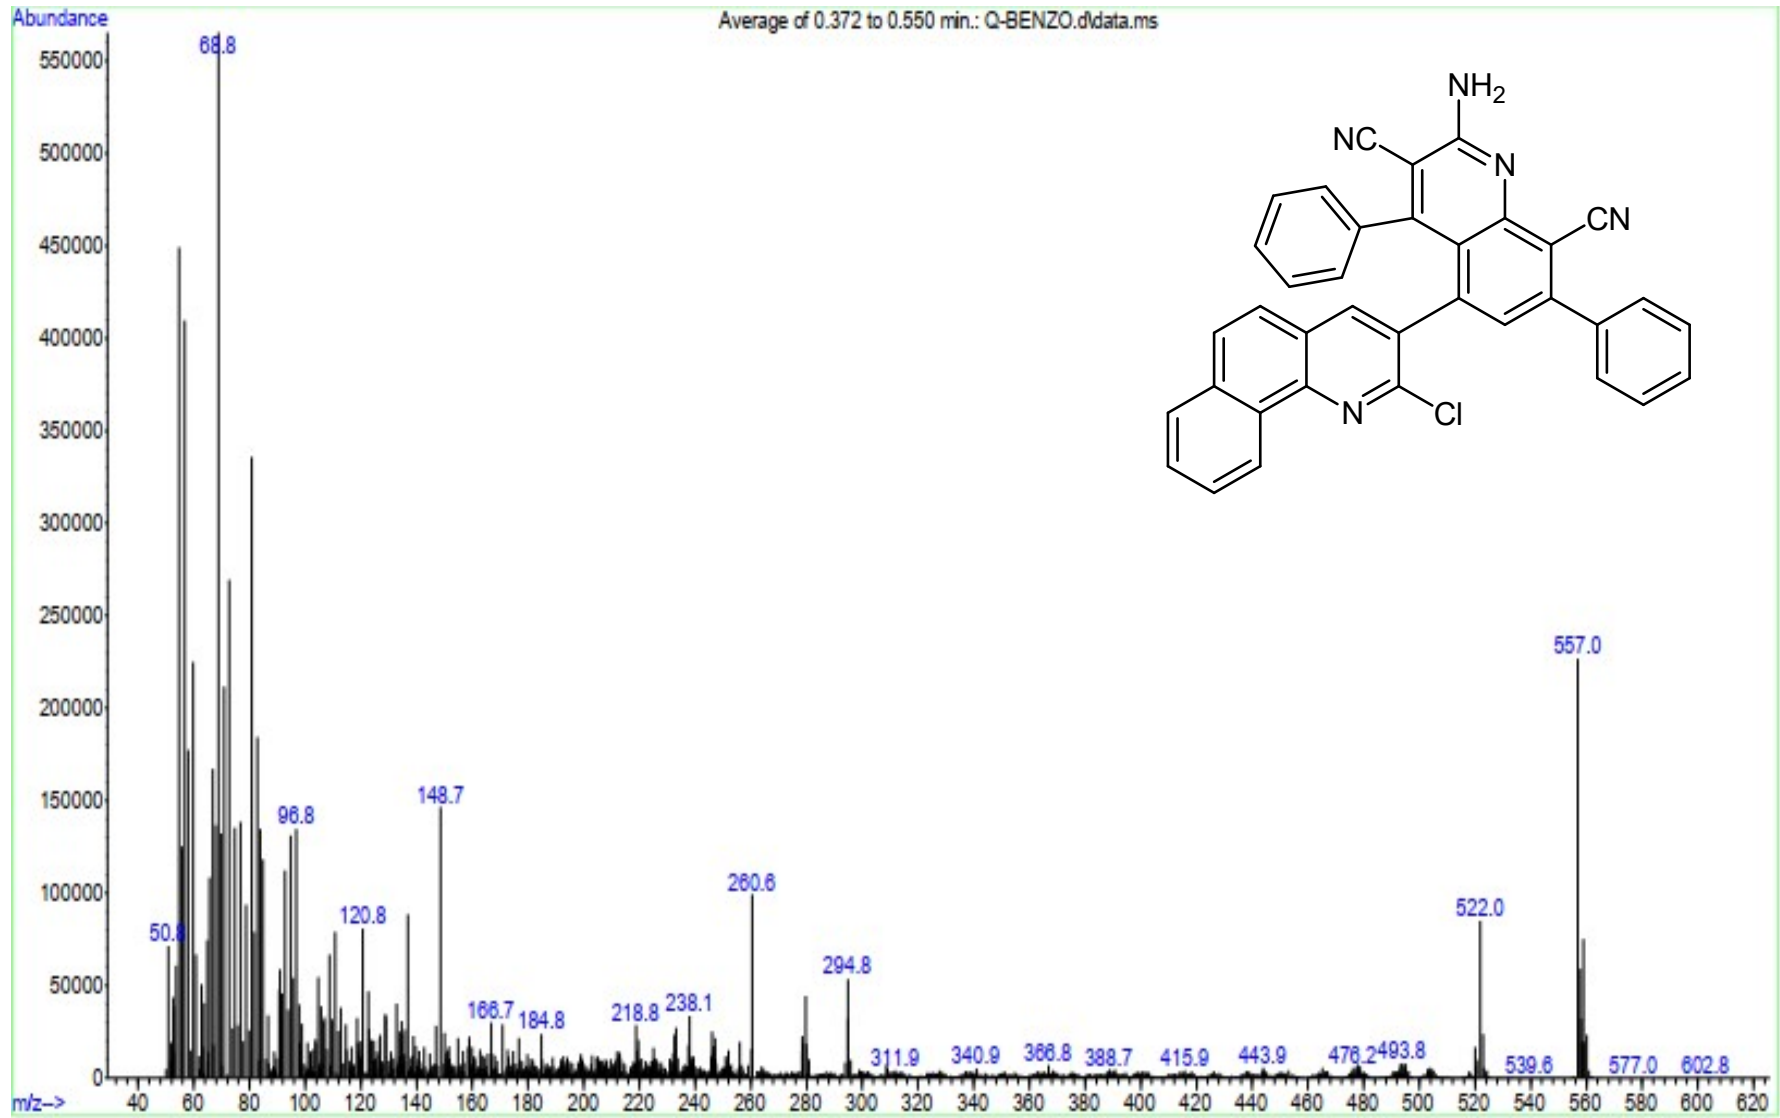

Mass spectrum **3j**
